# Supplementary material for: Effects of Digested Onion Extracts on Intestinal Gene Expression: An Interspecies Comparison Using Different Intestine Models
Source: PLoS One. 2016 Sep 15;11(9):e0160719. doi: 10.1371/journal.pone.0160719 (PMC5025074; doi:10.1371/journal.pone.0160719)
Supplement: S1 Table — Effects of digested onion extracts on mRNA expression in human Caco-2 cells. A heatmap of these data is given in Fig 1A. (XLSX) [file pone.0160719.s001.xlsx]

## Sheet: Caco2_YOdig_WOdig_SALdig_ for_C
Legend: Effects of digested onion extracts on mRNA expression in human Caco-2 cells
A heatmap of these data is given in Figure 1A.
S1 Table Caco2_WOd_YOd_affected_genes
Uniqid	NAME	Saline_Dig _1	Saline_Dig _2	Saline_Dig _3	WhiteOnion_Dig _1	WhiteOnion_Dig _2	WhiteOnion_Dig _3	YellowOnion_Dig _1	YellowOnion_Dig _2	YellowOnion_Dig _3
406969_at	MIR194-1	-0.48	0.45	0.04	-0.66	0.75	0.24	-0.72	0.59	0.17
1559_at	CYP2C9	-0.43	0.67	-0.24	-0.67	0.02	-0.03	-0.82	0.46	0.02
36_at	ACADSB	-0.61	0.27	0.33	-0.59	0.09	0.3	-0.64	-0.2	-0.05
6359_at	CCL15	-0.02	0.23	-0.21	-1.11	0.4	0.36	-0.69	-0.26	0.6
8972_at	MGAM	-0.3	-0.14	0.44	-0.75	-0.12	0.53	-0.62	-0.21	0.88
26808_at	SNORD42B	-0.62	0.2	0.42	-0.62	0.31	0.36	-0.38	0.34	0.71
10896_at	OCLM	0.13	-0.26	0.13	-0.26	0.74	0.84	-0.26	-0.14	0.89
132158_at	GLYCTK	-0.07	-0.08	0.14	-0.08	-0.25	-0.71	-0.67	-0.71	-0.75
100506127_at	LOC100506127	0.05	-0.04	-0.01	0	-0.19	-0.74	-0.48	-0.75	-0.7
4085_at	MAD2L1	0.05	-0.11	0.06	-0.15	-0.59	-0.84	-0.23	-0.38	-0.86
8318_at	CDC45	0.16	-0.06	-0.1	-0.2	-0.51	-0.67	-0.11	-0.72	-0.87
4174_at	MCM5	0.11	-0.18	0.07	0.08	-0.52	-0.74	-0.27	-0.68	-1.04
55771_at	PRR11	0.3	-0.11	-0.19	-0.18	-0.14	-0.62	-0.24	-0.61	-0.72
55008_at	HERC6	-0.33	0.51	-0.18	-0.59	-0.11	-0.27	-0.6	-0.55	-0.6
2329_at	FMO4	-0.1	0.23	-0.13	-0.62	0	-0.02	-0.81	-0.57	-0.63
10826_at	FAXDC2	-0.12	0.07	0.04	-0.68	-0.17	0.08	-0.96	-0.64	-0.38
5210_at	PFKFB4	-0.32	0.1	0.22	-0.66	-0.28	-0.66	-0.79	-0.42	-0.55
9970_at	NR1I3	-0.1	0.26	-0.16	-0.85	-0.23	-0.88	-1	-0.39	-0.58
64798_at	DEPTOR	-0.34	0.22	0.12	-0.68	-0.06	-0.6	-1.04	-0.28	-0.94
4129_at	MAOB	-0.27	0.48	-0.21	-0.7	-0.11	-0.54	-0.82	-0.17	-0.72
3223_at	HOXC6	0.08	0.07	-0.15	-0.49	-0.33	-0.69	-0.71	-0.83	-0.55
51478_at	HSD17B7	0.03	-0.02	-0.01	-0.76	-1.07	-0.74	-1.31	-1.1	-0.82
56997_at	ADCK3	0.05	-0.01	-0.04	-0.27	-0.43	-0.6	-0.7	-0.57	-0.75
883_at	CCBL1	-0.11	-0.08	0.2	-0.38	-0.34	-0.61	-0.61	-0.69	-0.83
593_at	BCKDHA	-0.13	0.02	0.11	-0.27	-0.52	-0.69	-0.6	-0.56	-0.85
151313_at	FAHD2B	-0.12	-0.03	0.15	-0.52	-0.65	-0.75	-0.79	-0.74	-0.78
147040_at	KCTD11	-0.16	0.1	0.06	-0.37	-0.49	-0.68	-0.65	-0.59	-0.55
84987_at	COX14	-0.14	0.09	0.05	-0.4	-0.39	-0.62	-0.77	-0.76	-0.73
221_at	ALDH3B1	-0.08	0.03	0.05	-0.34	-0.5	-0.52	-0.68	-0.67	-0.75
163175_at	LGI4	-0.01	-0.05	0.05	-0.34	-0.46	-0.67	-0.77	-0.83	-0.65
89846_at	FGD3	0.06	-0.03	-0.03	-0.44	-0.44	-0.49	-0.68	-0.63	-0.68
1612_at	DAPK1	0.04	-0.01	-0.02	-0.74	-0.81	-0.9	-0.97	-0.87	-1.24
340277_at	FAM221A	-0.12	0.08	0.04	-0.68	-0.48	-0.55	-0.62	-0.64	-0.83
8731_at	RNMT	-0.09	0.04	0.06	-0.5	-0.52	-0.39	-0.64	-0.71	-0.76
3155_at	HMGCL	-0.1	0.1	0	-0.57	-0.48	-0.37	-0.68	-0.6	-0.75
131920_at	TMEM207	-0.03	0.07	-0.05	-0.75	-0.55	-0.53	-0.88	-0.9	-1.03
725_at	C4BPB	-0.04	0.08	-0.04	-0.67	-0.61	-0.58	-0.68	-0.8	-0.86
3638_at	INSIG1	-0.04	0.01	0.03	-0.91	-0.77	-0.82	-1.09	-0.97	-1.04
9990_at	SLC12A6	-0.03	-0.04	0.07	-0.67	-0.42	-0.43	-0.59	-0.62	-0.52
158160_at	HSD17B7P2	-0.07	-0.09	0.17	-1.42	-1.16	-1.01	-1.15	-1.28	-1.22
80014_at	WWC2	-0.04	-0.11	0.15	-0.63	-0.63	-0.57	-0.69	-0.75	-0.77
9388_at	LIPG	-0.07	-0.05	0.12	-0.57	-0.79	-0.65	-0.57	-0.85	-0.78
3099_at	HK2	0.05	-0.06	0.01	-0.55	-0.63	-0.64	-0.54	-0.57	-0.69
285830_at	HLA-F-AS1	0.04	-0.06	0.02	-0.6	-0.54	-0.62	-0.46	-0.78	-0.73
255738_at	PCSK9	0.1	-0.08	-0.01	-0.49	-0.48	-0.76	-0.61	-0.82	-0.7
9249_at	DHRS3	-0.15	0.13	0.02	-0.58	-0.54	-0.65	-0.72	-0.49	-0.7
388403_at	YPEL2	-0.23	0.21	0.02	-0.91	-0.59	-0.86	-0.91	-0.73	-0.91
2886_at	GRB7	-0.08	0.08	0	-0.96	-0.75	-1.07	-0.86	-0.78	-1.15
5915_at	RARB	0.07	0.21	-0.28	-0.9	-0.5	-0.73	-1.06	-0.82	-1.19
26959_at	HBP1	0.06	0.1	-0.16	-0.83	-0.58	-0.89	-1.04	-0.68	-1.01
259266_at	ASPM	0.17	-0.06	-0.11	-0.32	-0.32	-0.66	-0.49	-0.61	-1.17
1063_at	CENPF	0.31	-0.2	-0.11	-0.41	-0.35	-0.59	-0.47	-0.68	-1
63920_at	C5orf54	0.12	-0.07	-0.04	-0.18	-0.4	-0.59	-0.26	-0.59	-0.59
51421_at	AMOTL2	0.11	-0.15	0.04	-0.33	-0.41	-0.83	-0.46	-0.86	-0.79
78987_at	CRELD1	0.02	0.01	-0.03	-0.36	-0.37	-0.71	-0.25	-0.68	-0.67
11119_at	BTN3A1	0.02	-0.02	0	-0.42	-0.34	-0.73	-0.7	-0.88	-1.11
147841_at	SPC24	0.08	-0.04	-0.05	-0.43	-0.34	-0.67	-0.52	-0.78	-0.8
1643_at	DDB2	-0.03	-0.02	0.04	-0.5	-0.47	-0.61	-0.68	-0.9	-0.9
1628_at	DBP	-0.02	0.03	-0.01	-0.51	-0.4	-0.63	-0.63	-0.8	-0.76
9694_at	EMC2	0.06	-0.01	-0.05	-0.4	-0.43	-0.52	-0.64	-0.78	-0.87
83990_at	BRIP1	0.09	-0.06	-0.03	-0.45	-0.4	-0.5	-0.64	-0.79	-0.96
995_at	CDC25C	0.05	-0.09	0.03	-0.3	-0.25	-0.59	-0.46	-0.87	-0.89
3148_at	HMGB2	0.15	-0.11	-0.04	-0.48	-0.37	-0.64	-0.5	-1.04	-1.19
286122_at	C8orf31	-0.03	0.03	0	-0.33	-0.37	-0.61	-0.39	-0.88	-0.82
29028_at	ATAD2	0.11	-0.1	-0.01	-0.33	-0.58	-0.59	-0.5	-0.75	-0.9
946_at	SIGLEC6	0.23	-0.01	-0.22	-0.47	-0.52	-0.98	-0.71	-1.1	-1.22
353322_at	ANKRD37	0.27	-0.05	-0.22	-0.44	-0.43	-0.9	-0.48	-0.85	-1.15
9918_at	NCAPD2	0.15	-0.12	-0.04	-0.19	-0.38	-0.66	-0.43	-0.72	-0.97
5984_at	RFC4	0.12	-0.13	0.01	-0.13	-0.29	-0.67	-0.5	-0.68	-0.85
3200_at	HOXA3	0.21	-0.03	-0.18	-0.49	-0.53	-0.54	-0.77	-0.81	-0.99
200765_at	TIGD1	0.2	0	-0.2	-0.52	-0.56	-0.56	-0.68	-0.8	-0.79
10282_at	BET1	-0.03	0.02	0.02	-0.27	-0.24	-0.15	-0.59	-0.7	-0.79
150135_at	LINC00479	0.13	0.1	-0.23	-0.29	-0.09	-0.39	-1.02	-0.72	-0.81
8549_at	LGR5	0.28	-0.08	-0.2	-0.18	-0.42	-0.68	-1.05	-0.86	-1.22
80862_at	ZNRD1-AS1	0.19	-0.07	-0.12	-0.22	-0.38	-0.44	-0.7	-0.84	-0.6
123876_at	ACSM2A	-0.35	-0.1	0.44	-0.97	-0.68	-0.38	-0.97	-0.72	-0.6
6480_at	ST6GAL1	-0.19	0	0.19	-0.6	-0.49	-0.14	-0.94	-0.85	-0.36
57198_at	ATP8B2	-0.22	-0.01	0.24	-0.7	-0.82	-0.47	-1.16	-0.98	-0.42
6568_at	SLC17A1	-0.12	-0.14	0.26	-0.58	-0.52	-0.46	-1.12	-1.22	-0.83
10050_at	SLC17A4	-0.08	0.19	-0.11	-0.77	-0.26	-0.42	-1	-0.62	-0.33
253017_at	TECRL	0.1	0.22	-0.32	-0.94	-0.45	-0.3	-0.95	-0.8	-0.95
90673_at	PPP1R3E	-0.08	0.07	0.01	-0.44	-0.05	-0.59	-0.69	-0.65	-0.66
200197_at	TMEM51-AS1	-0.24	0.19	0.05	-0.3	-0.09	-0.48	-0.69	-0.61	-0.66
1942_at	EFNA1	-0.19	0.1	0.09	-0.52	-0.33	-0.74	-0.98	-0.6	-1
1610_at	DAO	-0.45	0.23	0.22	-0.41	-0.22	-0.19	-0.95	-0.61	-0.63
389643_at	NUGGC	-0.33	0.19	0.14	-0.77	-0.06	-0.27	-0.8	-0.71	-0.64
3437_at	IFIT3	-0.45	0.28	0.17	-0.63	-0.22	-0.16	-0.74	-0.61	-0.74
6718_at	AKR1D1	-0.44	0.34	0.1	-0.9	-0.09	-0.09	-1.19	-0.53	-0.83
64081_at	PBLD	-0.36	0.34	0.01	-1.16	-0.37	-0.3	-1.4	-0.42	-0.73
255394_at	TCP11L2	-0.4	0.36	0.04	-1.38	-0.5	-0.47	-1.7	-0.62	-0.92
64080_at	RBKS	-0.25	0.37	-0.13	-0.68	-0.27	-0.27	-0.94	-0.52	-0.65
25840_at	METTL7A	-0.23	0.31	-0.08	-0.63	-0.1	-0.35	-0.94	-0.46	-0.67
2203_at	FBP1	-0.27	0.35	-0.09	-0.64	-0.27	-0.42	-0.78	-0.48	-0.76
2538_at	G6PC	-0.66	0.58	0.08	-1.25	-0.18	-0.6	-1.64	-0.57	-1.07
148003_at	LGALS16	-0.11	0.1	0.01	-0.91	-0.08	-0.19	-0.96	-0.55	-0.83
5324_at	PLAG1	-0.06	0.1	-0.05	-0.97	-0.32	-0.12	-0.97	-0.73	-0.8
135114_at	HINT3	-0.09	0.14	-0.04	-1.05	-0.37	-0.16	-1.14	-0.53	-0.71
8916_at	HERC3	-0.1	0.08	0.02	-1.04	-0.33	-0.42	-0.8	-0.57	-0.6
89953_at	KLC4	-0.21	0.02	0.19	-0.56	-0.35	-0.62	-0.61	-0.76	-0.55
80045_at	GPR157	-0.27	0.02	0.24	-0.6	-0.42	-0.54	-0.9	-0.8	-0.59
29986_at	SLC39A2	-0.25	0.16	0.09	-0.69	-0.26	-0.63	-0.69	-0.69	-0.68
6857_at	SYT1	-0.07	0.12	-0.05	-0.68	-0.22	-0.17	-1.09	-0.7	-0.4
26035_at	GLCE	-0.22	0.06	0.16	-0.76	-0.41	-0.26	-1.15	-0.73	-0.49
57158_at	JPH2	-0.11	0.01	0.1	-0.68	-0.32	-0.35	-0.97	-0.79	-0.56
55512_at	SMPD3	-0.21	0.13	0.08	-0.92	-0.48	-0.54	-1.39	-0.94	-0.61
9175_at	MAP3K13	-0.22	0.2	0.03	-0.65	-0.18	-0.36	-0.96	-0.69	-0.42
79818_at	ZNF552	-0.14	0.05	0.09	-1.14	-0.32	-0.41	-1.26	-0.96	-0.88
8743_at	TNFSF10	-0.39	0.2	0.19	-1	-0.51	-0.18	-1.3	-0.83	-0.66
56034_at	PDGFC	-0.27	0.18	0.1	-1.09	-0.39	-0.22	-1.22	-0.72	-0.49
9050_at	PSTPIP2	-0.41	0.25	0.15	-0.66	-0.26	-0.33	-1.01	-0.58	-0.81
80339_at	PNPLA3	-0.35	0.1	0.24	-0.67	-0.29	-0.36	-1.25	-0.84	-0.77
51471_at	NAT8B	-0.41	0.15	0.26	-0.9	-0.29	-0.63	-1.59	-1	-1.09
112611_at	RWDD2A	-0.24	0.11	0.13	-0.71	-0.29	-0.48	-1.13	-0.71	-0.78
9110_at	MTMR4	-0.18	0.07	0.11	-0.58	-0.27	-0.37	-0.8	-0.67	-0.66
653808_at	ZG16	-0.39	0.11	0.28	-0.69	-0.36	-0.42	-0.97	-0.6	-0.54
200010_at	SLC5A9	-0.19	0.07	0.12	-0.6	-0.53	-0.56	-0.91	-0.61	-0.55
134429_at	STARD4	-0.2	0.03	0.17	-0.79	-0.83	-0.57	-0.97	-0.84	-0.64
8556_at	CDC14A	-0.26	0.14	0.12	-0.97	-0.67	-0.42	-0.78	-0.65	-0.62
9766_at	KIAA0247	-0.25	0.11	0.14	-1	-0.74	-0.62	-1.14	-0.71	-0.82
51316_at	PLAC8	-0.13	0	0.13	-0.73	-0.47	-0.34	-0.73	-0.58	-0.6
646023_at	ADORA2A-AS1	-0.11	0.01	0.1	-0.87	-0.32	-0.67	-1.04	-0.77	-0.52
57507_at	ZNF608	-0.05	0.06	-0.01	-0.78	-0.38	-0.59	-1	-0.67	-0.57
9027_at	NAT8	-0.3	0.23	0.07	-0.93	-0.71	-0.43	-1.35	-1.01	-1.19
9792_at	SERTAD2	0.01	0.04	-0.06	-0.78	-0.23	-0.33	-0.72	-0.66	-0.61
8395_at	PIP5K1B	0.07	0.01	-0.07	-1.16	-0.51	-0.63	-1.09	-0.96	-1.23
80227_at	PAAF1	-0.02	0.01	0.02	-0.71	-0.29	-0.4	-0.65	-0.56	-0.62
84961_at	FBXL20	-0.21	0.16	0.05	-0.65	-0.35	-0.53	-0.94	-0.62	-0.79
5272_at	SERPINB9	-0.18	0.08	0.1	-0.69	-0.29	-0.45	-0.88	-0.52	-0.69
2053_at	EPHX2	-0.22	0.15	0.07	-0.68	-0.22	-0.39	-0.73	-0.42	-0.61
8821_at	INPP4B	-0.11	0.14	-0.03	-0.8	-0.4	-0.52	-0.98	-0.73	-0.9
3174_at	HNF4G	-0.11	0.17	-0.05	-0.8	-0.37	-0.5	-0.8	-0.62	-0.8
54800_at	KLHL24	-0.13	0.18	-0.05	-1.22	-0.5	-0.5	-1.49	-1.05	-1.15
29923_at	HILPDA	-0.09	0.11	-0.02	-1.01	-0.51	-0.52	-1.24	-0.9	-1.04
56477_at	CCL28	-0.15	0.17	-0.02	-0.82	-0.29	-0.36	-1.09	-0.73	-0.88
8309_at	ACOX2	-0.14	0.21	-0.07	-0.9	-0.56	-0.85	-1.34	-0.96	-1.02
4212_at	MEIS2	-0.03	0.05	-0.03	-0.59	-0.25	-0.4	-0.81	-0.63	-0.59
28970_at	C11orf54	-0.01	0.09	-0.08	-0.53	-0.28	-0.38	-0.84	-0.6	-0.62
246269_at	LACE1	-0.03	0.06	-0.03	-0.62	-0.29	-0.43	-0.8	-0.76	-0.77
153222_at	CREBRF	0.05	0.09	-0.13	-0.89	-0.58	-0.74	-1.23	-0.92	-1.06
55281_at	TMEM140	-0.22	0.19	0.03	-0.66	-0.53	-0.54	-0.97	-0.75	-0.95
127_at	ADH4	-0.19	0.26	-0.07	-0.8	-0.57	-0.59	-1	-0.81	-0.84
4601_at	MXI1	-0.03	0.04	-0.01	-0.74	-0.44	-0.43	-0.91	-0.49	-0.64
80704_at	SLC19A3	-0.08	-0.04	0.12	-0.88	-0.69	-0.74	-1.31	-1.35	-1.15
57599_at	WDR48	-0.05	0.03	0.02	-0.45	-0.46	-0.43	-0.7	-0.69	-0.64
6532_at	SLC6A4	-0.14	0.05	0.09	-0.5	-0.52	-0.46	-0.93	-0.79	-0.66
49855_at	SCAPER	-0.06	0.09	-0.03	-0.64	-0.54	-0.4	-0.93	-0.83	-0.62
166815_at	TIGD2	-0.1	0.09	0.01	-0.65	-0.47	-0.31	-0.95	-0.73	-0.63
8322_at	FZD4	0.03	-0.01	-0.02	-0.59	-0.36	-0.28	-0.78	-0.68	-0.61
901_at	CCNG2	-0.05	0.18	-0.13	-0.87	-0.5	-0.34	-0.85	-0.61	-0.68
159963_at	SLC5A12	-0.13	0.25	-0.13	-0.91	-0.49	-0.48	-1	-0.7	-0.56
5745_at	PTH1R	-0.14	-0.1	0.24	-0.62	-0.48	-0.38	-0.92	-0.68	-0.7
8470_at	SORBS2	-0.01	0.05	-0.04	-0.57	-0.3	-0.47	-1.13	-0.87	-0.59
443_at	ASPA	-0.11	0.22	-0.11	-0.77	-0.1	-0.21	-1.16	-0.57	-1.04
6928_at	HNF1B	-0.09	0.11	-0.02	-0.57	-0.08	-0.28	-1.13	-0.7	-0.78
116842_at	LEAP2	-0.22	0.21	0.01	-0.72	-0.06	-0.25	-1.62	-1.03	-1.18
144363_at	LYRM5	-0.05	0.09	-0.05	-0.67	-0.37	-0.24	-1.2	-0.74	-0.9
84996_at	C21orf119	-0.01	0.05	-0.04	-0.4	-0.29	-0.62	-1.05	-0.98	-1.23
376940_at	ZC3H6	-0.15	0.11	0.04	-0.47	-0.27	-0.42	-0.97	-0.78	-1.04
10279_at	PRSS16	0.1	-0.01	-0.08	-0.35	-0.1	-0.17	-0.66	-0.65	-0.65
642946_at	FLVCR1-AS1	0	0.17	-0.17	-0.51	-0.16	-0.3	-0.89	-0.89	-0.88
57150_at	SMIM8	0.07	0.04	-0.11	-0.43	-0.11	-0.32	-0.73	-0.63	-0.75
133746_at	JMY	0.09	0.06	-0.15	-0.75	-0.25	-0.52	-1.09	-1.02	-0.99
221443_at	OARD1	0.11	0.01	-0.12	-0.32	-0.22	-0.35	-0.59	-0.6	-0.62
23229_at	ARHGEF9	0.14	0.04	-0.19	-0.57	-0.2	-0.27	-0.95	-0.66	-0.69
284325_at	C19orf54	0.09	-0.01	-0.08	-0.65	-0.03	-0.34	-0.77	-0.71	-0.67
57763_at	ANKRA2	-0.11	0.19	-0.08	-0.51	-0.14	-0.35	-0.83	-0.68	-0.82
147727_at	ILF3-AS1	-0.17	0.3	-0.13	-0.98	-0.26	-0.64	-1.2	-1.12	-1.42
10249_at	GLYAT	-0.1	0.24	-0.14	-0.59	-0.24	-0.44	-0.74	-0.74	-0.74
64149_at	C17orf75	-0.13	0.16	-0.03	-0.51	-0.26	-0.24	-0.66	-0.62	-0.79
94240_at	EPSTI1	-0.26	0.32	-0.06	-0.63	-0.41	-0.28	-0.67	-0.67	-0.67
9771_at	RAPGEF5	0.13	0	-0.12	-0.84	-0.49	-0.47	-0.88	-0.74	-0.56
1060_at	CENPC	0.3	-0.27	-0.03	-0.78	-0.51	-0.51	-1.06	-0.87	-0.75
51275_at	MAPKAPK5-AS1	0	-0.22	0.22	-0.67	-0.26	-0.53	-0.45	-0.82	-0.69
3949_at	LDLR	-0.14	0.01	0.12	-0.68	-0.66	-0.61	-0.33	-0.41	-0.11
7780_at	SLC30A2	-0.03	0.46	-0.43	0.33	0.15	-0.66	-0.58	-0.65	-1.18
3698_at	ITIH2	0.54	0.08	-0.62	0.02	0.37	-0.85	0.07	-0.24	-0.91
8519_at	IFITM1	-0.62	1.16	-0.54	-0.44	-0.22	-0.7	-0.48	-0.23	-0.91
2537_at	IFI6	-0.89	1.54	-0.65	-0.17	0.89	-1.16	-0.82	0.49	-0.84
4496_at	MT1H	0.64	0.28	-0.92	1.24	0.62	-0.31	-0.1	-0.28	-1.06
4495_at	MT1G	0.51	0.47	-0.98	1.23	0.69	0.01	0.16	-0.38	-1.04
4493_at	MT1E	0.49	0.31	-0.81	1.71	0.74	0.58	0.07	-0.45	-1.26
4502_at	MT2A	0.31	0.35	-0.66	1.3	0.97	0.93	0.22	-0.17	-0.36
4501_at	MT1X	0.45	0.28	-0.73	1.89	1.29	1.05	0.35	-0.81	-0.85
1469_at	CST1	0.8	0.12	-0.92	0.9	0.14	-0.67	0.05	-0.22	-0.3
85391_at	SNORD14E	0.86	-0.51	-0.36	1.04	-0.25	0.04	1.33	-0.38	-0.02
25843_at	MOB4	0.83	-0.84	0.01	1.21	0.04	-0.21	2	-0.59	-0.77
8968_at	HIST1H3F	0.63	-0.49	-0.13	0.66	-0.51	-0.64	0.7	-0.25	-0.29
85235_at	HIST1H2AH	0.99	-0.5	-0.5	0.6	-0.36	-0.34	0.92	-0.14	-0.37
8346_at	HIST1H2BI	0.67	-0.28	-0.39	0.58	-0.3	-0.33	0.79	-0.39	-0.6
56662_at	VTRNA1-3	1.11	-0.74	-0.37	1.34	-0.52	-0.6	1.37	-0.54	-0.78
6134_at	RPL10	0.67	-0.06	-0.61	0.4	-0.66	-0.31	0.9	-0.95	-0.52
57035_at	C1orf63	0.42	-0.14	-0.28	0.31	-0.63	-0.58	0.41	-0.62	-0.66
8356_at	HIST1H3J	0.68	-0.46	-0.21	0.65	-0.61	-0.72	0.57	-0.45	-0.71
8335_at	HIST1H2AB	0.93	-0.57	-0.36	0.65	-0.91	-0.81	0.71	-0.78	-1.01
8349_at	HIST2H2BE	0.75	-0.29	-0.46	-0.05	-0.73	-0.85	0.2	-0.86	-0.85
56648_at	EIF5A2	-0.23	0.01	0.23	-0.12	0.21	0.81	0.42	0.77	0.7
27314_at	RAB30	-0.28	0.19	0.09	-0.32	0.38	0.8	0.2	0.67	0.82
570_at	BAAT	-0.3	0.23	0.07	0.13	0.52	0.78	0.21	0.59	0.59
55332_at	DRAM1	-0.27	0.18	0.09	0.28	0.77	0.71	0.39	0.69	0.49
3673_at	ITGA2	0	-0.06	0.06	0.08	-0.24	0.24	0.79	0.59	0.98
1906_at	EDN1	-0.09	0	0.09	0.08	-0.1	0.19	1.08	0.86	1.26
1263_at	PLK3	-0.16	0.02	0.14	0.2	0.04	0.19	1.01	0.7	0.9
5329_at	PLAUR	-0.11	-0.1	0.2	-0.05	0.03	0.42	0.78	0.66	0.97
54716_at	SLC6A20	0.13	-0.02	-0.11	-0.13	-0.07	0.13	0.91	0.83	0.79
3304_at	HSPA1B	0.38	-0.37	-0.01	1.28	0.37	0.62	1.24	0.28	0.39
3303_at	HSPA1A	0.48	-0.22	-0.27	0.89	0.45	1.05	1.11	0.43	0.66
3310_at	HSPA6	0	0	0	0.72	0	0.68	1.16	0	0.3
53834_at	FGFRL1	0.31	-0.09	-0.22	0.62	0.43	0.47	0.6	0.59	0.69
80212_at	CCDC92	-0.02	0.18	-0.16	0.69	0.81	0.46	0.51	0.64	0.59
1132_at	CHRM4	-0.09	-0.03	0.11	0.68	0.93	0.33	0.48	0.71	0.62
6508_at	SLC4A3	0.18	-0.07	-0.12	0.93	0.33	0.26	0.78	0.65	0.54
7345_at	UCHL1	0.36	-0.24	-0.12	1.26	0.75	0.51	1.2	0.83	0.59
54658_at	UGT1A1	0.25	-0.22	-0.03	1.06	0.67	0.65	0.92	0.88	0.58
55964_at	2003-09-01	0.38	-0.18	-0.19	1.46	1.55	0.9	1	0.92	0.51
6812_at	STXBP1	0.26	-0.01	-0.24	1.44	1.27	0.75	1.2	0.81	0.65
2583_at	B4GALNT1	0.16	-0.08	-0.08	1.26	0.96	0.73	1.04	0.66	0.58
4277_at	MICB	0.22	-0.01	-0.21	1.17	0.91	0.88	0.92	0.87	0.7
376267_at	RAB15	0.22	-0.05	-0.17	0.65	0.78	0.3	0.85	0.64	0.38
254428_at	SLC41A1	0.11	-0.17	0.07	0.86	0.98	0.37	1.06	0.75	0.56
23057_at	NMNAT2	0.11	0.02	-0.14	0.59	0.78	0.21	0.5	0.62	0.31
26353_at	HSPB8	-0.23	-0.05	0.28	0.34	0.43	0.62	1.22	0.58	1.07
4312_at	MMP1	0.18	-0.17	-0.01	0.64	0.18	0.59	1.85	1.05	1.28
26585_at	GREM1	0.08	-0.19	0.1	0.56	0.09	0.66	2.06	1.09	1.55
2260_at	FGFR1	0.15	-0.25	0.1	0.54	0.25	0.56	1.21	0.67	0.83
29950_at	SERTAD1	0.05	-0.09	0.04	0.52	0.1	0.15	0.85	0.63	0.63
284119_at	PTRF	0.07	-0.13	0.06	0.48	0.14	0.13	0.97	0.64	0.65
10936_at	GPR75	-0.1	-0.23	0.33	0.41	0.53	0.58	0.9	0.85	1.15
30844_at	EHD4	-0.1	0	0.1	0.09	0.07	0.27	0.59	0.69	0.67
55608_at	ANKRD10	0.06	-0.05	-0.02	0.07	0.1	0.26	0.7	0.62	0.65
7262_at	PHLDA2	0.13	-0.16	0.03	0.29	0.12	0.19	0.73	0.63	0.64
22943_at	DKK1	0.07	-0.2	0.13	0.35	0.14	0.38	1.07	0.88	0.94
339665_at	SLC35E4	0	0	0	0.35	0.15	0.27	0.98	0.97	1
23013_at	SPEN	0.06	-0.1	0.05	0.26	0.21	0.4	0.85	0.67	0.96
11010_at	GLIPR1	0.01	-0.04	0.03	0.39	0.11	0.46	1.02	0.91	1.19
8482_at	SEMA7A	-0.15	-0.04	0.19	0.54	0.31	0.49	1.57	1.06	1.32
54498_at	SMOX	-0.07	-0.05	0.13	0.49	0.18	0.32	0.86	0.63	0.74
84617_at	TUBB6	-0.05	-0.07	0.12	0.44	0.36	0.24	1.04	0.76	0.75
4884_at	NPTX1	0	0	0	0.39	0.47	0.29	1.09	0.81	0.81
1943_at	EFNA2	-0.11	-0.08	0.19	0.42	0.25	0.41	0.66	0.76	0.71
9424_at	KCNK6	0.01	-0.14	0.14	0.45	0.32	0.48	0.9	0.71	0.92
64320_at	RNF25	-0.06	-0.15	0.22	0.47	0.34	0.49	0.87	0.74	0.72
4982_at	TNFRSF11B	-0.21	-0.06	0.27	0.46	0.45	0.71	1.2	1.11	0.9
3566_at	IL4R	-0.2	-0.05	0.25	0.19	0.29	0.45	0.63	0.66	0.97
1364_at	CLDN4	-0.18	0.02	0.16	0.23	0.22	0.36	0.59	0.61	0.67
10221_at	TRIB1	-0.19	-0.04	0.23	0.34	0.46	0.71	1.05	1.16	1.4
1948_at	EFNB2	-0.21	-0.04	0.25	0.28	0.25	0.52	1.05	0.75	1.18
83855_at	KLF16	-0.03	0.03	0.01	0.15	0.31	0.27	0.65	0.71	0.6
3628_at	INPP1	-0.07	0.01	0.06	0.22	0.3	0.26	0.76	0.82	0.7
9245_at	GCNT3	-0.13	0.12	0.01	0.16	0.23	0.35	0.64	0.66	0.59
7791_at	ZYX	-0.12	0.1	0.03	0.2	0.26	0.27	0.65	0.66	0.7
114034_at	TOE1	-0.2	0.04	0.16	0.28	0.25	0.34	0.89	0.73	0.69
5271_at	SERPINB8	-0.17	0.03	0.13	0.24	0.27	0.4	0.99	0.85	1.02
388_at	RHOB	-0.14	0.03	0.11	0.33	0.21	0.29	0.71	0.69	0.8
4071_at	TM4SF1	-0.08	0.02	0.06	0.31	0.17	0.48	0.81	0.66	0.79
10626_at	TRIM16	-0.18	0.11	0.08	0.23	0.21	0.53	0.83	0.71	0.76
7016_at	TESK1	-0.01	0.01	-0.01	0.22	0.31	0.28	0.68	0.63	0.8
9600_at	PITPNM1	-0.13	-0.09	0.22	0.35	0.26	0.25	0.72	0.67	0.83
301_at	ANXA1	0.03	-0.01	-0.03	0.58	0.42	0.93	1.51	0.99	1.3
9314_at	KLF4	-0.07	0.02	0.05	0.39	0.11	0.4	0.63	0.63	0.67
6386_at	SDCBP	0	0.03	-0.04	0.42	0.13	0.46	0.82	0.87	0.8
135398_at	C6orf141	-0.02	0.03	-0.01	0.74	0.14	0.51	0.75	0.99	0.9
6549_at	SLC9A2	-0.03	-0.07	0.1	0.1	0.38	0.62	0.78	0.92	1.24
56262_at	LRRC8A	-0.03	-0.03	0.06	0.09	0.23	0.36	0.73	0.72	0.94
152559_at	PAQR3	0.08	-0.02	-0.06	0.29	0.14	0.57	0.69	0.68	0.69
9586_at	CREB5	0.21	-0.01	-0.21	0.46	0.55	0.8	1	1.17	1.35
10123_at	ARL4C	0.23	-0.11	-0.11	0.27	0.25	0.59	0.66	0.7	0.85
8061_at	FOSL1	0.29	-0.23	-0.06	0.45	0.18	0.62	0.91	0.75	0.98
338557_at	FFAR4	0.18	-0.14	-0.04	0.27	0.37	0.62	0.95	1.1	0.79
84975_at	MFSD5	-0.2	0.08	0.12	0.44	0.52	0.39	0.83	0.68	0.63
285590_at	SH3PXD2B	0.02	-0.1	0.07	0.62	0.89	0.66	0.79	0.78	0.81
2781_at	GNAZ	0.06	-0.16	0.1	0.52	0.73	0.52	0.55	0.82	0.69
51042_at	ZNF593	-0.05	0.06	-0.01	0.7	0.41	0.61	0.75	0.78	0.61
60312_at	AFAP1	-0.15	0.13	0.02	0.54	0.65	0.53	0.67	0.72	0.7
1728_at	NQO1	-0.15	0.14	0.01	0.65	0.56	0.64	0.71	0.83	0.57
1645_at	AKR1C1	-0.28	0.23	0.05	1.54	1.33	1.29	1.66	1.79	1.54
55337_at	C19orf66	-0.12	0.14	-0.02	0.35	0.52	0.48	0.63	0.68	0.62
123_at	PLIN2	-0.1	0.14	-0.04	0.45	0.49	0.62	0.73	0.72	0.6
3162_at	HMOX1	-0.23	0.06	0.17	1.69	1.39	1.61	1.29	1.12	1.3
784_at	CACNB3	-0.07	0	0.08	0.95	0.92	0.69	0.9	0.89	0.99
140710_at	SOGA1	0.04	-0.1	0.06	0.65	0.65	0.49	0.64	0.56	0.79
80228_at	ORAI2	-0.01	-0.13	0.14	0.81	0.63	0.73	0.8	0.82	0.97
6483_at	ST3GAL2	-0.12	-0.06	0.18	0.66	0.48	0.48	0.61	0.59	0.79
29948_at	OSGIN1	-0.14	-0.02	0.16	1.14	1.01	0.69	0.88	0.84	0.68
9253_at	NUMBL	0.01	-0.12	0.11	0.68	0.62	0.48	0.68	0.58	0.47
10962_at	MLLT11	-0.05	-0.1	0.15	1.24	1.23	0.99	1.13	0.96	0.87
8878_at	SQSTM1	-0.06	0	0.06	0.84	0.7	0.6	0.84	0.74	0.68
51704_at	GPRC5B	-0.11	-0.03	0.14	0.89	0.87	0.65	0.95	0.86	0.73
55315_at	SLC29A3	0.11	-0.02	-0.09	0.75	0.89	0.87	0.88	0.83	0.72
54578_at	UGT1A6	0.16	-0.03	-0.13	0.71	0.65	0.69	0.74	0.68	0.66
64403_at	CDH24	-0.06	0.01	0.04	0.73	0.69	0.67	0.9	0.66	0.75
7358_at	UGDH	-0.03	0	0.02	0.73	0.77	0.8	0.83	0.87	0.73
23657_at	SLC7A11	-0.07	-0.13	0.2	1.99	1.68	2.08	2.08	1.76	2.05
7296_at	TXNRD1	-0.04	0	0.05	1.67	1.48	1.61	1.74	1.52	1.57
2730_at	GCLM	-0.02	-0.02	0.04	1.54	1.43	1.71	1.61	1.5	1.51
140809_at	SRXN1	-0.04	-0.06	0.11	1.55	1.46	1.61	1.49	1.57	1.53
2729_at	GCLC	-0.15	0.13	0.03	1.3	1.39	1.51	1.53	1.4	1.47
91775_at	NXPE3	-0.08	-0.03	0.11	0.99	1.02	0.99	1.01	0.86	0.9
80176_at	SPSB1	-0.07	0.03	0.03	0.61	0.72	0.65	0.75	0.56	0.59
23157_at	2006-09-01	0.02	0	-0.02	0.7	0.63	0.49	0.67	0.71	0.55
1646_at	AKR1C2	0.06	0.13	-0.2	1.17	1.2	0.86	1.17	1.23	0.9
9817_at	KEAP1	-0.06	-0.07	0.14	0.68	0.5	0.44	0.72	0.77	0.63
147645_at	VSIG10L	0.1	-0.06	-0.04	0.63	0.65	0.43	0.64	0.45	0.53
79734_at	KCTD17	-0.01	-0.01	0.02	0.76	0.51	0.33	0.78	0.5	0.65
10019_at	SH2B3	0	0.06	-0.06	0.61	0.51	0.28	0.68	0.53	0.68
547_at	KIF1A	0.01	-0.17	0.16	0.99	0.91	0.62	1.32	0.87	0.99
3797_at	KIF3C	0.03	-0.01	-0.01	1.18	1.03	0.78	1.59	1.1	1.11
3306_at	HSPA2	0	0	0	1.05	0.9	0.9	1.35	1.01	0.85
2539_at	G6PD	0.24	-0.19	-0.04	1.45	1.08	0.86	1.49	1.2	0.97
22859_at	LPHN1	0.15	-0.13	-0.01	0.87	0.7	0.47	0.9	0.62	0.7
6624_at	FSCN1	0.13	-0.17	0.05	0.97	0.83	0.74	1.21	0.91	0.9
5871_at	MAP4K2	0.14	-0.03	-0.11	0.8	0.57	0.47	0.74	0.66	0.64
3315_at	HSPB1	0.18	-0.03	-0.15	0.68	0.64	0.45	0.86	0.68	0.65
8612_at	PPAP2C	0.04	-0.15	0.11	0.92	0.54	0.55	1.12	0.71	0.69
5305_at	PIP4K2A	-0.02	-0.08	0.1	0.73	0.41	0.44	0.72	0.52	0.59
2877_at	GPX2	0.3	0.05	-0.35	2.14	1.64	1.1	2.34	1.93	1.25
2288_at	FKBP4	0.06	-0.03	-0.03	0.69	0.47	0.38	1	0.64	0.47
9020_at	MAP3K14	-0.1	0.02	0.08	0.37	0.51	0.71	0.98	1	1
43_at	ACHE	-0.1	0.06	0.04	0.32	0.34	0.45	0.66	0.7	0.8
7461_at	CLIP2	-0.02	-0.01	0.03	0.48	0.65	0.5	0.98	1.08	1.14
57727_at	NCOA5	0.05	-0.08	0.03	0.3	0.52	0.52	0.83	0.73	0.81
51307_at	FAM53C	0.03	-0.03	0	0.31	0.49	0.47	0.72	0.63	0.75
57707_at	TLDC1	-0.02	-0.05	0.07	0.22	0.44	0.31	0.69	0.61	0.63
8870_at	IER3	-0.09	-0.05	0.13	0.42	0.39	0.42	0.78	0.68	0.72
27242_at	TNFRSF21	-0.03	-0.04	0.07	0.4	0.41	0.39	0.79	0.66	0.75
8682_at	PEA15	-0.06	0	0.06	0.54	0.53	0.53	0.88	0.76	0.8
23529_at	CLCF1	-0.04	-0.07	0.11	0.51	0.47	0.63	1.13	0.8	0.98
1267_at	CNP	-0.11	0.02	0.09	0.4	0.36	0.48	0.64	0.62	0.67
200942_at	KLHDC8B	-0.24	0.12	0.12	0.73	0.63	0.64	1.02	1.15	1.05
1497_at	CTNS	-0.07	0.02	0.05	0.38	0.4	0.42	0.65	0.8	0.68
23092_at	ARHGAP26	-0.09	0.02	0.06	0.6	0.61	0.43	0.75	0.71	0.89
65009_at	NDRG4	-0.17	0.03	0.13	0.74	0.93	0.91	1.05	1.16	1.28
123920_at	CMTM3	-0.06	-0.05	0.11	0.65	0.59	0.55	0.71	0.91	0.96
4144_at	MAT2A	-0.01	-0.02	0.03	0.75	0.79	0.84	1.01	1.01	1.03
6793_at	STK10	0.06	-0.12	0.06	0.74	0.67	0.6	1.01	0.95	1.03
64748_at	LPPR2	0	-0.05	0.05	0.66	0.56	0.58	0.83	0.83	0.79
9260_at	PDLIM7	0.11	-0.11	0	0.73	0.74	0.76	1.07	0.91	0.94
150465_at	TTL	-0.01	-0.06	0.07	0.64	0.68	0.59	0.88	0.74	0.84
10057_at	ABCC5	0.03	-0.09	0.06	0.9	0.87	0.89	1.26	0.98	1.22
747_at	DAGLA	0	-0.09	0.09	0.51	0.43	0.53	0.78	0.59	0.72
84243_at	ZDHHC18	0.17	-0.12	-0.05	0.57	0.53	0.59	0.88	0.83	0.78
10672_at	GNA13	-0.07	0.03	0.04	0.41	0.45	0.71	0.73	0.75	0.74
151195_at	CCNYL1	0.05	0.04	-0.09	0.42	0.38	0.64	0.75	0.73	0.68
9764_at	KIAA0513	0	0	0	0.66	0.8	1.04	1.3	1.07	0.94
2717_at	GLA	0.1	-0.08	-0.02	0.53	0.5	0.8	1.06	0.8	0.84
8187_at	ZNF239	0.01	-0.07	0.06	0.39	0.67	0.79	0.78	0.59	0.74
23212_at	RRS1	0.07	-0.17	0.11	0.43	0.56	0.73	0.61	0.77	0.81
26005_at	C2CD3	0.05	-0.02	-0.03	0.47	0.6	0.67	0.62	0.7	0.78
11127_at	KIF3A	0.02	-0.1	0.08	0.56	0.65	0.88	0.86	0.96	0.97
11031_at	RAB31	0.05	-0.15	0.1	0.88	0.96	1.19	1.24	1.13	1.34
84085_at	FBXO30	0.04	-0.08	0.03	0.5	0.5	0.71	0.62	0.5	0.66
55558_at	PLXNA3	0.23	-0.21	-0.02	0.61	0.43	0.46	0.93	0.69	0.79
10287_at	RGS19	0.09	-0.12	0.03	0.45	0.48	0.32	0.69	0.7	0.66
51066_at	SSUH2	0.01	0.01	-0.02	0.47	0.31	0.52	0.95	0.83	0.71
7162_at	TPBG	0.08	-0.09	0	0.68	0.45	0.35	0.97	0.64	0.75
5270_at	SERPINE2	0.04	0.09	-0.13	0.97	0.62	0.64	1.24	1.04	1.12
55323_at	LARP6	0.03	-0.03	0	0.54	0.43	0.46	0.85	0.64	0.62
1382_at	CRABP2	0.08	-0.04	-0.04	0.76	0.53	0.54	0.99	0.86	0.71
7030_at	TFE3	-0.03	-0.03	0.06	0.57	0.36	0.45	0.73	0.66	0.64
3995_at	FADS3	-0.03	-0.11	0.13	0.8	0.56	0.49	1.15	0.91	0.88
7057_at	THBS1	0.1	-0.13	0.03	0.77	0.39	0.58	1.16	1.09	1.01
7040_at	TGFB1	0.1	-0.12	0.01	0.69	0.36	0.45	1.03	0.89	0.91
54852_at	PAQR5	0.12	-0.01	-0.11	0.75	0.54	0.34	1.08	0.87	0.66
84959_at	UBASH3B	0.06	0.03	-0.09	0.47	0.37	0.23	0.93	0.74	0.59
30850_at	CDR2L	0.14	-0.07	-0.07	0.6	0.53	0.45	1.15	1	0.7
4839_at	NOP2	0.09	-0.19	0.1	0.53	0.22	0.22	0.84	0.65	0.61
2316_at	FLNA	0.07	-0.16	0.09	0.67	0.25	0.2	0.91	0.6	0.7
9123_at	SLC16A3	-0.02	-0.11	0.13	0.75	0.31	0.29	0.9	0.7	0.7
222229_at	LRWD1	0.01	-0.11	0.1	0.73	0.34	0.28	0.93	0.72	0.66
114787_at	GPRIN1	0.08	-0.04	-0.04	0.59	0.42	0.18	0.69	0.66	0.61
64285_at	RHBDF1	-0.01	-0.01	0.02	0.54	0.34	0.19	0.71	0.62	0.63
23625_at	FAM89B	0.03	-0.08	0.05	0.66	0.42	0.15	0.84	0.67	0.8
6926_at	TBX3	0.12	-0.05	-0.07	0.44	0.16	0.32	0.81	0.66	0.81
9143_at	SYNGR3	0.04	0.07	-0.11	0.37	0.3	0.23	0.62	0.65	0.68
3727_at	JUND	0.02	0.02	-0.04	0.36	0.3	0.26	0.84	0.72	0.79
2810_at	SFN	0.13	-0.04	-0.09	0.75	0.57	0.43	1.45	1.27	1.25
91663_at	MYADM	0.17	-0.04	-0.13	0.41	0.45	0.4	0.87	0.75	0.87
3661_at	IRF3	-0.07	-0.01	0.08	0.4	0.34	0.22	0.6	0.7	0.65
80201_at	HKDC1	0	-0.16	0.16	0.74	0.35	0.6	0.9	0.65	0.98
4356_at	MPP3	0.1	-0.14	0.04	0.7	0.33	0.5	0.86	0.56	0.8
56675_at	NRIP3	0.04	-0.02	-0.02	0.57	0.27	0.66	0.75	0.54	0.69
57057_at	TBX20	0.2	-0.15	-0.05	0.43	0.49	0.65	0.77	0.6	0.57
10940_at	POP1	0.2	-0.15	-0.05	0.35	0.68	0.7	0.84	0.73	0.71
4862_at	NPAS2	0.09	0.09	-0.18	0.38	0.56	0.27	0.67	0.65	0.66
256472_at	TMEM151A	-0.05	0.15	-0.1	0.49	0.45	0.18	0.77	0.62	0.61
80117_at	ARL14	0.09	0.11	-0.2	0.41	0.44	0.55	1.03	0.92	0.78
54474_at	KRT20	0.09	0.18	-0.27	0.49	0.59	0.65	1.3	1.38	1.11
5054_at	SERPINE1	-0.29	-0.02	0.31	0.9	0.25	0.81	1.16	0.87	1.19
26086_at	GPSM1	-0.19	-0.05	0.23	0.8	0.27	0.44	0.84	0.69	0.82
10999_at	SLC27A4	-0.2	-0.11	0.31	0.48	0.37	0.5	0.66	0.61	0.7
84976_at	DISP1	0	0.12	-0.11	0	0.44	0.7	0.38	0.67	0.8
23035_at	PHLPP2	0.02	-0.01	-0.01	0.01	0.39	0.62	0.38	0.72	0.83
79683_at	ZDHHC14	0.12	0.02	-0.14	0.12	0.35	0.69	0.51	0.87	0.79
1365_at	CLDN3	-0.07	0.1	-0.03	0.33	0.76	0.68	0.68	0.83	0.82
5911_at	RAP2A	-0.15	0	0.15	0.35	0.68	0.61	0.6	0.64	0.63
283422_at	C12orf36	-0.21	0.06	0.15	0.65	1.22	0.9	1	1.46	1.04
22924_at	MAPRE3	-0.23	0.28	-0.05	0.43	0.78	0.55	0.71	0.77	0.71
79183_at	TTPAL	-0.08	-0.01	0.09	0.23	0.46	0.64	0.31	0.61	0.63
342132_at	ZNF774	-0.07	-0.04	0.11	0.05	0.55	0.68	0.29	0.69	0.69
55969_at	C20orf24	-0.18	0.11	0.07	0.12	0.37	0.73	0.62	0.73	0.54
6999_at	TDO2	0	0	0	0.3	0.41	1.1	0.99	1.07	0.99
3981_at	LIG4	-0.04	-0.04	0.07	0.21	0.39	0.99	0.75	0.85	0.85
92935_at	MARS2	0.02	-0.02	0.01	0.19	0.36	0.58	0.6	0.63	0.67
57103_at	C12orf5	-0.16	-0.1	0.27	0.42	0.82	1.22	1.15	1.21	1.27
493861_at	EID3	-0.12	-0.14	0.25	0.26	0.94	1.08	0.97	1.06	1.29
6940_at	ZNF354A	-0.09	-0.02	0.1	0.39	0.71	1.08	0.86	0.98	0.87
1318_at	SLC31A2	-0.34	0.13	0.21	0.28	0.47	0.64	0.56	0.8	0.88
283219_at	KCTD21	-0.16	0.12	0.04	0.12	0.64	0.68	0.63	0.91	0.83
51341_at	ZBTB7A	-0.15	0.13	0.02	0.18	0.39	0.62	0.45	0.72	0.74
22848_at	AAK1	-0.13	0.11	0.01	0.32	0.58	0.73	0.56	0.87	0.99
84981_at	MIR22HG	-0.28	0.15	0.13	0.33	0.63	0.88	1.02	0.96	0.97
84879_at	MFSD2A	-0.16	0.14	0.02	0.2	0.31	0.53	0.6	0.61	0.65
3656_at	IRAK2	-0.18	0.14	0.04	0.37	0.31	0.64	0.66	0.76	0.93
91947_at	ARRDC4	-0.06	-0.11	0.17	0.36	0.37	0.68	0.59	0.52	0.62
6443_at	SGCB	-0.13	-0.02	0.14	0.17	0.67	1.07	0.68	0.74	0.7
1374_at	CPT1A	-0.24	0.14	0.1	0.42	0.46	0.61	0.33	0.65	0.63
55803_at	ADAP2	-0.14	0	0.14	0.56	0.62	0.69	0.46	0.42	0.68
22949_at	PTGR1	-0.27	0.14	0.12	0.45	0.68	0.81	0.62	0.55	0.7
2054_at	STX2	-0.18	0.09	0.08	0.52	0.71	1	0.47	0.66	0.84
84699_at	CREB3L3	-0.11	0.23	-0.11	0.43	0.7	0.89	0.56	0.71	0.95
26750_at	RPS6KC1	-0.35	0.13	0.22	0.15	0.62	0.62	0.5	0.56	0.68
400410_at	ST20	0.03	0.12	-0.15	0.54	0.64	0.9	0.51	0.71	0.62
123803_at	NTAN1	-0.22	0.06	0.17	0.68	0.41	0.63	1.13	0.64	0.52
5802_at	PTPRS	0.28	-0.18	-0.1	0.69	0.37	0.14	0.84	0.63	0.68
51655_at	RASD1	0.2	-0.06	-0.15	0.49	0.25	-0.03	0.94	0.7	0.76
10052_at	GJC1	0.19	-0.32	0.14	0.65	0.41	0.34	0.98	0.61	0.63
56261_at	GPCPD1	-0.17	-0.08	0.25	0.6	0.61	0.64	0.67	0.23	0.76
26024_at	PTCD1	0.17	-0.18	0.01	0.64	0.18	-0.07	0.62	0.87	0.07
677771_at	SCARNA4	-0.1	-0.04	0.14	0.62	0.86	0.63	0.14	0.32	-0.23
55652_at	SLC48A1	-0.07	0.06	0.01	0.59	0.81	0.62	0.3	0.35	0.16
