# Supplementary material for: Effects of Digested Onion Extracts on Intestinal Gene Expression: An Interspecies Comparison Using Different Intestine Models
Source: PLoS One. 2016 Sep 15;11(9):e0160719. doi: 10.1371/journal.pone.0160719 (PMC5025074; doi:10.1371/journal.pone.0160719)
Supplement: S2 Table — Effects of digested onion extracts on mRNA expression in rat intestine slices ex vivo. A heatmap of these data is given in Fig 1B. (XLSX) [file pone.0160719.s002.xlsx]

## Sheet: Rat_Intest_YOdig_WOdig_SALdig_ 
Legend: Effects of digested onion extracts on mRNA expression in rat intestine slices
S2 Table Rat_Intest_WOd_YOd_affected_genes
Entrez Gene	NAME	Saline_Dig _1	Saline_Dig _2	Saline_Dig _3	WhiteOnion_Dig _1	WhiteOnion_Dig _2	WhiteOnion_Dig _3	YellowOnion_Dig _1	YellowOnion_Dig _2	YellowOnion_Dig _3
500836	Il22	-1.2	1	0.2	1.2	-1.3	-0.5	-0.6	-1.8	-1.8
315039	Osr2	1	-0.7	-0.3	-0.5	-0.2	0	-0.1	-0.2	-1.7
80848	Cubn	0.73	-0.47	-0.27	-0.17	-0.17	0.03	-0.57	-0.87	-1.77
303729	Enpp7	0.97	-0.73	-0.23	-0.03	-0.13	-0.03	-0.33	-0.63	-1.83
498659	RatNP-3b	0.63	-0.47	-0.17	-0.17	-0.47	-1.07	-0.17	-0.67	-1.97
100909484	LOC100909484	0.9	-0.4	-0.5	-0.3	-0.5	-1.1	-0.1	-0.7	-2.1
613220	Defa-rs1	0.67	-0.33	-0.33	-0.13	-0.23	-0.73	0.07	-0.43	-1.53
290856	Defa24	0.67	-0.43	-0.23	-0.13	-0.13	-0.73	0.07	-0.33	-1.33
501559	RGD1562161	0.63	-0.07	-0.57	-0.37	-0.77	-0.07	-0.27	-0.67	-0.37
171056	Cx3cr1	-0.33	-0.13	0.47	-0.83	-0.03	-0.23	-0.63	-0.83	-0.93
64553	Akap6	-0.53	0.37	0.17	-0.53	-0.13	-0.03	-1.33	-1.13	-0.83
691123	Fam19a3	0	-0.4	0.4	-0.6	-0.4	-0.7	-0.4	-0.3	-0.6
60417	Ecel1	-0.5	0.3	0.2	-0.4	-0.6	-0.5	-0.8	-0.7	-0.5
689103	LOC689103	-0.87	0.73	0.13	-0.77	-0.77	-0.87	-1.47	-0.97	-0.77
689230	LOC689230	-0.53	0.57	-0.03	-0.43	-0.43	-0.73	-0.73	-0.83	-0.23
286918	Mx2	-0.2	0.6	-0.4	-0.6	-0.6	-0.6	-0.5	-0.6	-0.6
65137	Ruvbl1	-0.17	0.03	0.13	-0.67	-1.07	-0.67	-0.37	-0.97	-0.47
678704	Atp13a3	-0.17	0.13	0.03	-0.77	-0.67	-0.47	-0.47	-0.17	-0.67
503220	RGD1559935	-0.17	-0.07	0.23	-0.57	-0.67	-0.77	-0.77	-0.17	-0.17
500266	Fam19a1	-0.03	-0.03	0.07	-0.63	-0.63	-0.43	-0.73	-0.23	-0.23
291582	Slc27a6	0.07	0.17	-0.23	-0.93	-0.83	-0.93	-0.23	-0.33	-0.13
63883	Kcne3	0.07	0.07	-0.13	-0.73	-1.03	-0.93	-0.43	-0.43	-0.43
282840	Atf5	-0.03	0.07	-0.03	-0.43	-0.63	-0.83	-0.63	-0.33	-0.43
29591	Tgfbr1	0	0	0	-0.5	-1.1	-1.5	-0.8	-0.5	-0.7
474154	Rbm4b	0.2	-0.1	-0.1	-0.6	-0.2	-0.3	-0.4	-0.6	-0.6
29141	Gal	0.17	0.07	-0.23	-0.93	-0.23	-0.23	-0.43	-0.63	-0.93
100360330	LOC100360330	0.03	-0.07	0.03	-0.87	-0.27	-0.47	-0.07	-0.77	-0.87
314800	Acss3	0.5	-0.3	-0.2	-0.6	-0.4	-0.6	-0.2	-0.4	-0.7
100359956	LOC100359956	0.37	-0.33	-0.03	-0.73	-0.43	-0.73	-0.23	-0.33	-0.73
29692	Pla2g2a	0.37	-0.23	-0.13	-0.63	-0.63	-1.23	-0.53	-0.93	-1.73
25335	Mmp7	0.8	-0.4	-0.4	-1.3	-1.2	-1.7	-0.9	-1.5	-2.6
313557	Hivep3	-0.1	0.2	-0.1	-0.2	-0.3	-0.5	-0.6	-0.6	-0.7
293152	Art2b	-0.03	-0.13	0.17	-0.73	-0.43	-0.23	-0.53	-0.63	-0.63
311252	Pamr1	-0.17	-0.07	0.23	-0.57	-0.37	-0.37	-0.77	-0.87	-0.67
25245	Bdkrb2	-0.1	0	0.1	-0.7	-0.5	-0.5	-0.9	-0.6	-0.9
81687	Mmp9	-0.17	-0.07	0.23	-0.57	-0.47	-0.47	-0.97	-0.77	-1.07
116510	Timp1	0.1	0	-0.1	-0.4	-0.3	-0.4	-0.7	-0.6	-0.6
50566	Grem1	0	0.1	-0.1	-0.5	-0.3	-0.5	-1	-0.7	-0.7
25663	Il1r1	-0.03	-0.03	0.07	-0.33	-0.23	-0.23	-0.83	-0.73	-0.63
494021	Lmcd1	-0.07	-0.07	0.13	-0.67	-0.47	-0.67	-1.37	-1.27	-1.07
299266	Asb2	-0.13	-0.03	0.17	-0.83	-0.53	-0.63	-1.23	-1.13	-1.13
361832	Bicc1	-0.1	0	0.1	-0.7	-0.5	-0.4	-1.1	-1	-0.9
289337	Tlr5	-0.03	0.07	-0.03	-0.43	-0.33	-0.33	-0.83	-0.83	-0.83
24326	Ednra	-0.07	0.03	0.03	-0.37	-0.37	-0.27	-0.77	-0.77	-0.77
259227	Vof16	-0.1	0.1	0	-0.6	-0.3	-0.5	-1.2	-1.1	-1
114555	Casp4	0.03	-0.07	0.03	-0.27	-0.37	-0.27	-0.67	-0.77	-0.67
294335	Susd2	0.13	-0.07	-0.07	-0.67	-0.27	-0.17	-0.77	-0.67	-0.77
361686	Osbpl5	0.2	-0.2	0	-0.5	-0.3	-0.2	-0.7	-0.6	-0.8
171396	Sulf1	0.13	-0.07	-0.07	-0.47	-0.37	-0.27	-0.77	-0.67	-0.77
100911855	LOC100911855	0.17	-0.03	-0.13	-0.63	-0.33	-0.33	-0.73	-0.53	-0.63
685170	Wfdc8	-0.4	0.1	0.3	-0.6	-0.6	-0.6	-0.9	-0.9	-1
24446	Hgf	-0.4	0.2	0.2	-0.5	-0.5	-0.4	-0.8	-0.7	-0.7
79113	Fgr	-0.2	0	0.2	-0.4	-0.6	-0.3	-0.6	-0.7	-0.8
308100	Acat3	0	-0.2	0.2	-0.4	-0.8	-0.6	-0.9	-0.8	-0.6
288031	Fam43a	-0.2	0	0.2	-0.4	-0.9	-0.6	-1	-0.9	-0.8
311984	Pion	-0.07	0.03	0.03	-0.17	-0.67	-0.37	-0.67	-0.57	-0.77
293820	Psat1	0.07	-0.03	-0.03	-0.63	-0.63	-0.83	-0.53	-0.63	-0.33
293710	Lgals12	0.3	-0.1	-0.2	-0.8	-0.7	-0.8	-0.6	-0.4	-0.5
296184	Ankef1	0.2	0	-0.2	-0.6	-0.7	-0.6	-0.4	-0.6	-0.4
114494	Ccna2	0.23	-0.07	-0.17	-0.77	-0.87	-0.67	-0.57	-0.57	-0.47
50556	Exoc6	0.13	-0.07	-0.07	-0.57	-0.67	-0.67	-0.47	-0.67	-0.47
306962	Hist1h2ac	0.27	-0.13	-0.13	-0.63	-0.63	-0.73	-0.43	-0.53	-0.33
60357	Prom1	0.07	-0.03	-0.03	-0.73	-0.63	-0.73	-0.43	-0.43	-0.43
298850	Cenpa	0.13	0.03	-0.17	-0.87	-0.87	-0.97	-0.47	-0.57	-0.77
493574	Ispd	0.17	-0.03	-0.13	-0.73	-0.73	-0.53	-0.43	-0.43	-0.63
100910200	LOC100910200	0.2	-0.2	0	-0.8	-0.6	-0.5	-0.3	-0.7	-0.6
298296	Pcsk9	0.37	-0.33	-0.03	-0.93	-0.83	-0.93	-0.63	-0.93	-0.83
363031	Anln	0.13	-0.07	-0.07	-0.67	-0.57	-0.67	-0.27	-0.67	-0.47
291355	Prtfdc1	0.23	-0.17	-0.07	-0.57	-0.47	-0.87	-0.87	-0.77	-0.87
25333	Mgp	0.17	-0.13	-0.03	-0.63	-0.43	-0.73	-0.93	-0.83	-0.83
361458	Akap7	0.17	-0.03	-0.13	-0.53	-0.33	-0.73	-0.73	-0.53	-0.73
25686	Gnai1	0.3	-0.1	-0.2	-0.5	-0.3	-0.5	-0.6	-0.6	-0.9
286926	Tfpi2	0.23	-0.17	-0.07	-0.57	-0.37	-0.77	-0.77	-0.77	-1.27
25429	Cyp7b1	0.13	-0.07	-0.07	-0.37	-0.37	-0.47	-0.77	-0.67	-0.87
29592	Bcat1	0.03	0.13	-0.17	-0.67	-0.47	-0.67	-0.77	-0.77	-1.07
24617	Serpine1	0.1	-0.2	0.1	-0.6	-0.3	-0.5	-0.7	-0.7	-1
171040	Il11	0.07	-0.23	0.17	-0.63	-0.33	-0.63	-0.63	-0.53	-0.93
361879	Wdr41	-0.03	0.07	-0.03	-0.83	-0.73	-0.73	-0.43	-0.53	-0.83
295490	Emcn	-0.1	0.1	0	-0.9	-0.7	-0.8	-0.5	-0.8	-0.9
361324	Sema6a	0	0.1	-0.1	-0.6	-0.6	-0.5	-0.7	-0.7	-0.4
689092	LOC689092	0	0.2	-0.2	-0.5	-0.7	-0.6	-0.7	-0.5	-0.4
316426	Spats2l	-0.03	0.17	-0.13	-0.63	-0.63	-0.63	-0.63	-0.53	-0.43
685697	Supt3h	0.1	0.1	-0.2	-0.6	-0.6	-0.6	-0.6	-0.6	-0.5
689765	B3galtl-ps1	0.1	0.1	-0.2	-0.6	-0.7	-0.7	-0.6	-0.6	-0.6
366631	RGD1560556	0.03	0.03	-0.07	-0.77	-0.47	-0.67	-0.67	-0.77	-0.47
29221	Arg1	0.1	-0.1	0	-0.6	-0.6	-0.5	-0.7	-0.5	-1
24660	Pmp22	0.03	-0.07	0.03	-0.67	-0.57	-0.37	-0.67	-0.47	-1.07
307428	Tnfaip8	-0.03	-0.03	0.07	-0.73	-0.93	-0.63	-1.03	-0.73	-1.23
25239	Apod	0.2	-0.1	-0.1	-0.8	-0.7	-0.5	-0.6	-0.5	-0.9
362935	Ly6al	0.43	-0.37	-0.07	-1.17	-1.27	-0.67	-1.07	-1.07	-1.87
310879	Alpk1	0.23	-0.17	-0.07	-0.47	-0.87	-0.57	-0.77	-0.77	-1.17
310877	Tifa	0.3	-0.2	-0.1	-0.7	-1.3	-1.2	-1.2	-1.1	-1.7
500689	Ttc9	-0.13	-0.03	0.17	-0.53	-0.63	-0.63	-0.53	-0.63	-1.03
311210	Tspan18	-0.03	-0.03	0.07	-0.53	-0.63	-0.63	-0.53	-0.63	-0.93
310616	Creb3l4	0.03	-0.07	0.03	-0.47	-0.77	-0.47	-0.67	-0.77	-0.77
100147704	Usp43_predicted	0.07	-0.03	-0.03	-0.53	-0.73	-0.33	-0.53	-0.63	-0.63
298533	Eif2c4	-0.1	0.1	0	-0.5	-0.9	-0.7	-0.8	-0.7	-0.8
24888	Bcl2l1	-0.1	0	0.1	-0.4	-0.7	-0.6	-0.7	-0.5	-0.7
25265	P2ry1	-0.07	0.13	-0.07	-0.57	-0.77	-0.47	-0.77	-0.47	-0.67
292044	Cdyl2	0.1	-0.2	0.1	-0.6	-0.5	-0.6	-1	-0.7	-0.8
25285	Igfbp5	-0.07	-0.17	0.23	-0.97	-0.77	-0.77	-1.27	-0.87	-0.87
252856	Tcf21	0	-0.3	0.3	-0.7	-0.7	-0.9	-1	-0.8	-0.9
301033	Lrrc2	0.17	-0.33	0.17	-0.83	-1.03	-1.13	-1.13	-1.03	-1.13
294090	Ifit1lb	0.1	0	-0.1	-0.7	-0.5	-0.5	-0.8	-0.5	-0.6
94202	Ptprr	0	0.1	-0.1	-0.6	-0.6	-0.5	-0.8	-0.6	-0.6
361472	Mthfd1l	-0.07	0.03	0.03	-0.87	-0.97	-0.97	-0.77	-1.17	-1.17
288475	Nptx2	-0.07	-0.07	0.13	-0.77	-0.87	-0.77	-0.67	-1.17	-1.07
494202	Oas3	-0.07	0.23	-0.17	-0.67	-0.77	-0.77	-0.57	-0.87	-0.97
64133	Xylt1	-0.03	0.17	-0.13	-0.53	-0.63	-0.63	-0.43	-0.73	-0.63
29586	Gjb5	-0.07	0.23	-0.17	-1.07	-0.87	-1.17	-0.87	-1.17	-1.27
365864	Tuft1	0	0.1	-0.1	-0.6	-0.6	-0.6	-0.6	-0.7	-0.7
84590	Rab27b	0.03	0.13	-0.17	-0.67	-0.77	-0.77	-0.77	-0.77	-0.97
360991	Vrk2	0	0.1	-0.1	-0.6	-0.8	-0.9	-0.8	-0.9	-0.9
170496	Lcn2	0	0.1	-0.1	-0.6	-0.7	-0.8	-0.7	-1	-0.9
311324	Disp2	0.07	0.07	-0.13	-0.53	-0.53	-0.53	-0.73	-0.73	-0.63
361346	LOC361346	0.03	0.03	-0.07	-0.67	-0.67	-0.67	-0.77	-0.97	-0.77
25383	Apobec1	0	0.1	-0.1	-0.5	-0.5	-0.5	-0.7	-0.8	-0.7
292188	Rnf217	0	0.1	-0.1	-0.5	-0.6	-0.5	-0.6	-0.8	-0.7
361749	Il33	0.27	-0.23	-0.03	-1.13	-1.13	-1.23	-1.53	-1.73	-1.93
171553	A3galt2	0.17	-0.13	-0.03	-0.63	-0.43	-0.43	-0.73	-0.63	-0.83
298077	RGD1305807	0.2	-0.1	-0.1	-0.6	-0.6	-0.5	-0.7	-0.7	-0.8
65189	Stk3	0.17	-0.13	-0.03	-0.73	-0.63	-0.53	-0.73	-0.73	-0.93
501854	Rab7b	0.27	-0.23	-0.03	-1.23	-0.93	-0.93	-1.13	-1.23	-1.33
304815	Elf3	0.1	-0.1	0	-0.6	-0.5	-0.5	-0.7	-0.7	-0.7
498015	Pitpnc1	0.07	-0.03	-0.03	-0.63	-0.43	-0.53	-0.73	-0.73	-0.83
171500	Stau2	0.1	0	-0.1	-0.5	-0.6	-0.5	-0.7	-0.7	-0.8
311061	Itgb6	0.07	-0.03	-0.03	-1.03	-1.23	-1.03	-1.43	-1.33	-1.53
365038	Samd5	-0.03	-0.03	0.07	-0.63	-0.53	-0.73	-0.73	-0.83	-0.83
29616	Ptprm	-0.07	-0.07	0.13	-0.67	-0.67	-0.67	-0.77	-0.97	-0.87
81780	Ccl5	-0.17	-0.07	0.23	-0.87	-0.67	-0.77	-0.97	-0.87	-0.97
64047	Lrat	-0.07	-0.07	0.13	-0.57	-0.47	-0.57	-0.67	-0.67	-0.67
25380	Anxa1	-0.07	-0.07	0.13	-0.67	-0.47	-0.57	-0.77	-0.67	-0.87
191595	Syt12	0.03	-0.17	0.13	-0.47	-0.57	-0.57	-0.77	-0.67	-0.97
494343	Tacstd2	0.1	-0.2	0.1	-0.6	-0.6	-0.7	-0.9	-0.7	-1.1
170635	Dhrs9	0.07	-0.13	0.07	-0.63	-0.63	-0.63	-0.93	-0.73	-1.03
25696	Vldlr	0.03	-0.07	0.03	-0.77	-0.67	-0.67	-0.77	-0.87	-1.07
360857	Rgs16	0	-0.1	0.1	-0.8	-0.7	-0.8	-0.8	-0.9	-1.2
58840	Mapk6	0	-0.1	0.1	-0.8	-0.7	-0.7	-0.8	-0.7	-1
65164	Htra1	-0.07	-0.07	0.13	-0.57	-0.57	-0.47	-0.77	-0.67	-0.87
60335	Tgm1	-0.03	-0.13	0.17	-0.83	-0.93	-0.93	-1.13	-1.13	-1.33
25291	Anxa3	0.03	-0.07	0.03	-0.57	-0.57	-0.47	-0.77	-0.77	-0.97
498079	Cd96	-0.07	-0.07	0.13	-0.97	-0.77	-0.67	-1.17	-1.07	-1.17
24654	Plcb1	0	0	0	-0.6	-0.4	-0.4	-0.7	-0.7	-0.7
679837	Adam12	-0.03	-0.03	0.07	-0.73	-0.63	-0.43	-0.73	-0.93	-0.83
362993	Rnd1	-0.13	0.07	0.07	-0.63	-0.73	-0.73	-0.93	-0.73	-1.03
500011	RGD1563091	-0.17	0.13	0.03	-0.57	-0.67	-0.67	-0.97	-0.87	-0.97
114116	Cdc42bpa	-0.07	0.03	0.03	-0.47	-0.47	-0.47	-0.67	-0.67	-0.67
306264	Ankrd28	-0.13	0.07	0.07	-0.63	-0.73	-0.63	-0.93	-0.93	-0.93
287405	Tmem220	-0.07	0.03	0.03	-0.47	-0.57	-0.57	-0.67	-0.77	-0.67
312052	Steap2	-0.2	0.2	0	-0.9	-1	-1	-1.1	-1.3	-1.2
363123	Rab6b	-0.1	0.1	0	-0.9	-0.8	-0.7	-0.9	-0.9	-1.2
56822	Cd86	-0.17	0.13	0.03	-0.77	-0.77	-0.57	-0.87	-0.97	-1.07
29220	Thbs4	-0.13	0.17	-0.03	-0.73	-0.73	-0.63	-1.03	-0.83	-1.03
309380	Loxl4	-0.13	0.17	-0.03	-0.93	-0.73	-0.83	-1.23	-1.33	-1.43
308444	Axl	-0.1	0	0.1	-0.4	-0.4	-0.4	-0.7	-0.6	-0.6
296787	Sema3c	0	0	0	-0.6	-0.6	-0.5	-1	-0.9	-1
310132	Osmr	0.03	-0.07	0.03	-0.77	-0.77	-0.87	-1.47	-1.17	-1.27
100362623	LOC100362623	-0.07	0.03	0.03	-1.07	-0.97	-1.07	-1.77	-1.27	-1.57
170897	Sphk1	-0.07	0.03	0.03	-0.87	-0.87	-0.87	-1.37	-1.07	-1.37
100362769	LOC100362769	0	-0.1	0.1	-1.3	-1.2	-1.2	-1.8	-1.2	-1.5
83470	Bmp1	0.1	-0.1	0	-0.5	-0.6	-0.6	-0.8	-0.6	-0.7
266603	Aldh1a3	-0.07	0.03	0.03	-0.57	-0.47	-0.77	-0.87	-0.87	-1.07
292851	Klk9	-0.1	0.1	0	-0.6	-0.4	-0.8	-0.8	-0.8	-0.8
554172	Pxdn	0.03	-0.07	0.03	-0.47	-0.37	-0.57	-0.67	-0.77	-0.67
691670	LOC691670	0	0	0	-0.8	-0.5	-0.8	-0.8	-0.9	-0.8
500573	Tmco4	0.13	-0.07	-0.07	-0.47	-0.77	-0.57	-0.77	-0.67	-0.67
304817	Ipo9	0.1	-0.1	0	-0.5	-0.5	-0.6	-0.6	-0.6	-0.5
365042	Rab32	0.07	-0.03	-0.03	-0.43	-0.53	-0.63	-0.73	-0.73	-0.63
362535	Lurap1l	0.13	-0.07	-0.07	-0.57	-0.67	-0.57	-0.67	-0.97	-0.77
293741	Ms4a12	0.13	-0.07	-0.07	-0.47	-0.67	-0.57	-0.67	-0.77	-0.67
366140	Fjx1	0.1	-0.1	0	-0.5	-0.4	-0.6	-0.6	-0.4	-0.6
116669	Vwf	0.1	-0.1	0	-0.5	-0.4	-0.6	-0.6	-0.5	-0.7
25673	Anxa5	0.13	-0.17	0.03	-0.87	-0.77	-0.97	-0.87	-0.87	-1.17
60338	Fxyd5	0.13	-0.27	0.13	-0.87	-0.67	-0.97	-0.77	-0.77	-0.97
298543	Aim1l	0	0	0	-0.7	-0.6	-0.7	-0.7	-0.5	-0.8
305078	Lamb3	0.03	-0.07	0.03	-0.77	-0.67	-0.77	-0.87	-0.57	-0.97
117540	Plscr1	-0.03	-0.03	0.07	-0.73	-0.83	-0.63	-0.63	-0.63	-0.73
501185	RGD1563692	-0.03	-0.03	0.07	-0.83	-1.13	-0.93	-0.93	-0.73	-1.03
298436	Tspan1	0.17	-0.13	-0.03	-0.73	-0.73	-0.73	-0.73	-0.63	-0.93
294804	Rai14	0.17	-0.13	-0.03	-0.83	-0.83	-0.73	-0.83	-0.73	-1.03
81681	Lss	0.2	-0.2	0	-0.6	-0.6	-0.5	-0.6	-0.5	-0.7
25675	Hmgcr	0.1	-0.1	0	-0.7	-0.8	-0.6	-0.7	-0.6	-0.7
29637	Hmgcs1	0.1	-0.1	0	-0.6	-0.7	-0.5	-0.7	-0.5	-0.7
308937	Wee1	0.17	-0.13	-0.03	-0.63	-0.63	-0.53	-0.43	-0.63	-0.63
300886	Mthfs	0.07	-0.03	-0.03	-0.73	-0.73	-0.53	-0.53	-0.73	-0.73
60351	Nr1h4	0.03	0.03	-0.07	-0.77	-0.97	-0.67	-0.67	-0.77	-0.87
295161	Fhdc1	0	0	0	-0.8	-0.9	-0.8	-0.6	-0.8	-0.8
64467	Entpd2	0.13	-0.07	-0.07	-0.77	-0.77	-0.67	-0.57	-0.57	-0.67
116699	Inpp4b	0.1	-0.1	0	-0.6	-0.7	-0.6	-0.5	-0.6	-0.6
25098	Foxa1	0.1	-0.1	0	-0.7	-0.8	-0.7	-0.6	-0.6	-0.7
89784	Idi1	0.1	-0.1	0	-0.6	-0.6	-0.5	-0.5	-0.4	-0.6
25324	Htr4	0.23	-0.17	-0.07	-1.57	-1.57	-1.27	-1.17	-1.27	-1.67
309081	Dock1	0.1	0	-0.1	-0.7	-0.7	-0.7	-0.8	-0.8	-0.8
307582	Lama3	0.1	0	-0.1	-0.5	-0.6	-0.6	-0.7	-0.6	-0.7
116589	Serpinb5	0.27	-0.03	-0.23	-0.93	-0.93	-1.13	-1.13	-1.03	-1.23
294674	Enc1	0	0.1	-0.1	-0.6	-0.6	-0.7	-0.7	-0.6	-0.6
59073	Lxn	0.03	0.03	-0.07	-0.57	-0.57	-0.67	-0.67	-0.67	-0.57
499014	Zdhhc14	-0.07	0.03	0.03	-0.77	-0.77	-0.77	-0.87	-0.77	-0.87
362375	Lancl2	-0.03	0.07	-0.03	-0.53	-0.63	-0.63	-0.63	-0.63	-0.63
29547	Homer2	-0.03	0.07	-0.03	-0.83	-0.93	-0.93	-0.93	-0.93	-1.03
366275	Ptk6	-0.07	0.03	0.03	-0.67	-0.87	-0.77	-0.97	-0.87	-0.97
503306	Sowahc	-0.07	0.03	0.03	-0.67	-0.67	-0.87	-0.87	-0.77	-0.87
305579	RGD1305110	-0.17	0.13	0.03	-0.67	-0.77	-0.77	-0.67	-0.77	-0.77
503257	Tmem194b	-0.13	0.07	0.07	-0.63	-0.73	-0.73	-0.73	-0.73	-0.73
24307	Cyp4b1	-0.13	0.17	-0.03	-1.13	-1.13	-1.13	-1.13	-1.13	-1.03
293711	Hrasls5	0.1	0	-0.1	-1.1	-1	-1.1	-1	-1	-0.9
296562	Npdc1	0	0	0	-0.7	-0.7	-0.7	-0.6	-0.6	-0.6
685680	LOC685680	0.07	-0.03	-0.03	-1.03	-1.03	-0.93	-0.93	-0.93	-0.83
314212	Daam1	0	0	0	-0.6	-0.5	-0.6	-0.6	-0.6	-0.6
140944	Slc28a3	0	0	0	-1.1	-1	-1.2	-1	-1.1	-1
310645	Pmvk	0.03	-0.07	0.03	-0.67	-0.67	-0.67	-0.77	-0.57	-0.77
114517	Itga6	0	0	0	-0.8	-0.9	-0.8	-0.9	-0.7	-0.9
100910806	LOC100910806	-0.03	0.07	-0.03	-0.73	-0.73	-0.73	-0.83	-0.63	-0.73
501088	Tbc1d5	0	0.1	-0.1	-0.6	-0.6	-0.5	-0.6	-0.5	-0.6
81652	Ctbs	0.03	0.03	-0.07	-0.67	-0.67	-0.57	-0.67	-0.57	-0.57
246217	Ngef	0	0.1	-0.1	-0.7	-0.8	-0.7	-0.7	-0.7	-0.7
310363	Fbxo4	0.07	0.07	-0.13	-0.63	-0.73	-0.73	-0.73	-0.63	-0.73
314260	Plek2	0.1	0	-0.1	-0.7	-0.8	-0.8	-0.8	-0.7	-0.8
306204	Flnb	0.1	0	-0.1	-0.6	-0.6	-0.6	-0.6	-0.5	-0.6
366061	Galnt3	0.03	0.03	-0.07	-0.67	-0.67	-0.67	-0.67	-0.57	-0.67
498402	Ascc2	0	-0.1	0.1	-0.5	-0.6	-0.6	-0.6	-0.5	-0.7
361084	Lmo7	0.07	-0.13	0.07	-0.63	-0.83	-0.73	-0.83	-0.73	-0.93
298340	Slc6a14	0.03	-0.07	0.03	-0.87	-1.17	-1.07	-0.97	-0.97	-1.07
312790	Gprc5a	0.03	-0.07	0.03	-0.87	-1.07	-0.97	-0.97	-0.97	-1.17
89823	Trpc6	0.07	-0.13	0.07	-0.63	-0.73	-0.63	-0.73	-0.73	-0.73
682968	LOC682968	0.07	-0.03	-0.03	-1.43	-1.23	-1.13	-1.33	-1.23	-1.33
305633	LOC305633	0.07	-0.03	-0.03	-1.03	-0.83	-0.83	-0.93	-0.83	-1.03
54348	Stk39	0.1	-0.1	0	-0.9	-0.8	-0.8	-0.8	-0.8	-0.9
29585	Gjb3	0.1	-0.1	0	-1.3	-1.1	-1.2	-1.1	-1.1	-1.4
192362	Lamc2	0.07	-0.13	0.07	-0.93	-0.93	-0.83	-1.03	-0.93	-1.13
29538	Ccl20	0.17	-0.13	-0.03	-1.33	-1.33	-1.03	-1.43	-1.23	-1.43
170921	Itga2	0.07	-0.03	-0.03	-0.63	-0.63	-0.63	-0.73	-0.63	-0.83
338475	Nrep	0.03	-0.07	0.03	-1.07	-1.07	-1.17	-1.07	-1.17	-1.27
315716	Cd276	0.13	-0.07	-0.07	-0.97	-0.87	-0.97	-1.07	-1.17	-1.17
314961	Asap1	0.1	-0.1	0	-1.1	-1	-1.1	-1.3	-1.3	-1.3
314694	Chst11	0.03	-0.07	0.03	-0.57	-0.57	-0.57	-0.67	-0.67	-0.77
315936	Zbtb38	0.03	-0.07	0.03	-0.57	-0.57	-0.67	-0.67	-0.67	-0.77
289949	Fam3d	0.1	-0.1	0	-0.9	-0.9	-0.8	-0.9	-1	-1
25508	Pam	0	0	0	-0.5	-0.6	-0.5	-0.6	-0.6	-0.6
292485	Fuca2	0.07	-0.03	-0.03	-0.73	-0.83	-0.73	-0.83	-0.83	-0.73
25631	Smad3	0	0	0	-0.6	-0.7	-0.6	-0.7	-0.7	-0.6
363239	Raph1	0	0	0	-0.5	-0.6	-0.6	-0.6	-0.6	-0.6
294093	Ankrd22	0.07	-0.03	-0.03	-0.93	-1.13	-1.13	-1.13	-1.13	-1.03
310791	Slc25a24	0.03	-0.07	0.03	-0.67	-0.77	-0.67	-0.77	-0.67	-0.67
66025	Lpar3	0.13	-0.17	0.03	-1.57	-1.57	-1.57	-1.67	-1.67	-1.67
282829	Tac4	0.2	-0.1	-0.1	-1.6	-1.6	-1.6	-1.6	-1.6	-1.6
65984	Aacs	0.1	-0.1	0	-0.8	-0.8	-0.8	-0.8	-0.7	-0.8
292657	Slc1a5	-0.1	0	0.1	-0.7	-0.6	-0.6	-0.8	-0.7	-0.7
362740	Mbip	-0.07	0.03	0.03	-0.77	-0.57	-0.67	-0.77	-0.67	-0.67
501177	Gpr55	0	0	0	-0.7	-0.6	-0.6	-0.7	-0.6	-0.6
312812	Eps8	-0.03	-0.03	0.07	-0.63	-0.53	-0.53	-0.63	-0.53	-0.63
24309	Dbp	0	0	0	-0.7	-0.6	-0.6	-0.8	-0.8	-0.7
25507	Pcsk6	0.03	-0.07	0.03	-1.07	-0.97	-1.17	-1.37	-1.17	-1.17
29260	Tlr4	0.13	0.03	-0.17	-0.97	-0.97	-0.77	-0.97	-0.77	-1.07
365528	Trim40	-0.13	-0.03	0.17	-0.63	-0.53	-0.63	-0.63	-0.53	-0.63
291854	Gpr97	-0.13	-0.03	0.17	-0.43	-0.53	-0.63	-0.63	-0.63	-0.63
306283	Anxa8	-0.07	-0.07	0.13	-0.77	-0.87	-1.07	-0.87	-0.87	-1.07
362129	Gtdc1	0	0	0	-0.6	-0.6	-0.5	-0.5	-0.8	-0.5
306505	Lonrf1	-0.03	-0.03	0.07	-0.83	-0.63	-0.63	-0.53	-0.83	-0.63
680308	Mthfd2	0	0	0	-0.7	-0.6	-0.7	-0.4	-0.8	-0.6
313874	Rasgrp3	0.13	-0.17	0.03	-0.87	-0.67	-0.87	-0.57	-0.77	-0.77
83792	Scd	0.3	-0.3	0	-1.2	-0.9	-1.1	-1	-1.3	-1
500156	Atoh1	0.13	-0.17	0.03	-1.47	-0.97	-1.07	-1.07	-1.47	-1.37
84017	Hmga2	0.13	-0.07	-0.07	-0.67	-0.47	-0.57	-0.57	-0.67	-0.67
29540	Hsd17b7	0.17	-0.03	-0.13	-0.73	-0.63	-0.73	-0.53	-0.73	-0.83
29134	Axin2	-0.07	0.03	0.03	-1.07	-0.87	-0.77	-0.67	-0.77	-0.57
365871	RGD1566380	-0.03	0.07	-0.03	-0.93	-1.03	-0.63	-0.73	-0.73	-0.73
58835	Phgdh	-0.1	0	0.1	-0.8	-0.8	-0.8	-0.8	-0.7	-0.6
83626	Ugcg	-0.1	0	0.1	-0.6	-0.6	-0.5	-0.6	-0.5	-0.5
366492	Epha2	-0.1	0	0.1	-0.7	-0.7	-0.6	-0.6	-0.5	-0.5
297814	Car8	-0.23	0.17	0.07	-0.93	-1.03	-0.93	-0.93	-0.73	-0.83
306506	Pragmin	-0.1	0	0.1	-0.6	-0.6	-0.5	-0.6	-0.4	-0.6
361505	Cdc42ep5	0.1	-0.1	0	-0.6	-0.7	-0.6	-0.7	-0.5	-0.5
306141	Spry2	0.1	-0.1	0	-0.7	-0.7	-0.6	-0.8	-0.6	-0.5
308344	Fam71e2	0.13	-0.17	0.03	-1.07	-0.97	-0.97	-1.37	-1.07	-0.87
300761	Gramd2	0.07	-0.03	-0.03	-0.93	-1.03	-1.03	-1.03	-1.03	-0.73
303412	Rnf43	0	0	0	-0.8	-0.8	-0.7	-0.8	-0.8	-0.5
689399	Cenpw	0	0	0	-0.9	-0.9	-0.8	-0.7	-0.9	-0.6
404280	Mid1ip1	0.07	-0.03	-0.03	-0.53	-0.63	-0.63	-0.63	-0.43	-0.43
64824	Nab1	0	0	0	-0.5	-0.6	-0.6	-0.7	-0.4	-0.4
362798	Ncapg2	0.03	-0.07	0.03	-0.67	-0.67	-0.67	-0.67	-0.37	-0.57
688459	LOC688459	0	0	0	-0.6	-0.7	-0.6	-0.6	-0.4	-0.5
362279	Pard6b	0	0	0	-0.7	-0.6	-0.7	-0.7	-0.5	-0.6
116551	Pdk1	0.07	0.07	-0.13	-0.73	-0.63	-0.63	-0.73	-0.53	-0.53
680692	Golm1	0.1	0	-0.1	-0.7	-0.6	-0.6	-0.6	-0.4	-0.5
308064	Cep72	0.07	0.07	-0.13	-0.73	-0.83	-0.73	-0.63	-0.43	-0.53
313211	Nipsnap3b	0.23	-0.17	-0.07	-0.77	-0.67	-0.67	-0.57	-0.47	-0.57
315036	Vps13b	0.17	-0.13	-0.03	-0.63	-0.63	-0.63	-0.43	-0.43	-0.53
287924	Yars2	0.23	-0.17	-0.07	-0.67	-0.67	-0.77	-0.57	-0.57	-0.67
304822	Pkp1	0.13	-0.07	-0.07	-1.17	-1.07	-1.27	-1.07	-0.87	-1.17
296179	Fermt1	0.2	-0.1	-0.1	-0.7	-0.7	-0.8	-0.7	-0.5	-0.7
296758	Armc10	0.23	-0.07	-0.17	-0.67	-0.77	-0.77	-0.77	-0.57	-0.57
362191	Atpbd4	-0.1	0	0.1	-0.8	-0.7	-0.6	-0.7	-0.8	-0.8
499660	Sprr1a	-0.33	0.07	0.27	-1.03	-0.83	-0.83	-0.93	-1.13	-1.03
304537	Ccdc64	0.07	-0.13	0.07	-0.63	-0.73	-1.03	-0.53	-0.73	-0.93
25261	Id1	0	0	0	-0.5	-0.8	-0.8	-0.5	-0.6	-0.6
140914	Olr1	0.03	0.13	-0.17	-0.77	-1.07	-1.27	-0.97	-0.97	-1.37
307151	Bmi1	-0.03	0.17	-0.13	-0.63	-0.43	-0.63	-0.63	-0.53	-0.63
498796	Fam107b	-0.03	0.07	-0.03	-0.63	-0.33	-0.63	-0.53	-0.43	-0.63
679784	Slc17a4	0.23	-0.17	-0.07	-0.57	-0.57	-0.47	-0.77	-0.67	-0.67
296060	Arhgap11a	0.1	-0.1	0	-0.6	-0.7	-0.6	-0.5	-0.4	-0.8
500640	Ccdc71l	0	-0.1	0.1	-0.5	-0.6	-0.6	-0.5	-0.3	-0.7
85247	S100a6	0.13	-0.17	0.03	-0.57	-0.77	-0.67	-0.67	-0.37	-0.67
100911946	LOC100911946	0	-0.1	0.1	-0.5	-0.6	-0.8	-0.7	-0.4	-0.7
306695	Zfp367	0.17	-0.13	-0.03	-0.63	-0.43	-0.63	-0.43	-0.43	-0.73
680531	Sapcd2	0.07	-0.13	0.07	-0.63	-0.53	-0.73	-0.33	-0.33	-0.63
25424	Ctse	-0.13	0.07	0.07	-0.33	-0.43	-0.63	-0.53	-0.63	-0.63
25667	Bmp3	0.17	-0.03	-0.13	-0.63	-0.63	-0.33	-0.73	-0.63	-0.43
29437	Acta1	-0.4	0.3	0.1	-0.8	-0.8	-1	-0.9	-0.8	-0.8
691960	LOC691960	-0.47	0.23	0.23	-0.87	-1.17	-1.27	-1.47	-1.17	-0.67
60423	Slc28a2	-0.37	0.23	0.13	-0.87	-1.47	-1.37	-1.47	-1.37	-0.67
361042	Pck2	-0.1	0	0.1	-0.6	-0.8	-0.7	-0.8	-0.6	-0.4
58813	Nt5e	-0.17	-0.07	0.23	-0.47	-0.77	-0.67	-0.77	-0.47	-0.37
309378	Golga7b	0.2	-0.3	0.1	-0.7	-0.6	-0.5	-0.5	-0.4	-0.8
100359715	LOC100359715	-0.1	0	0.1	-0.3	-0.2	-0.6	-0.6	-0.3	-0.7
25426	Cyp1b1	-0.13	-0.13	0.27	-0.53	-0.13	-0.53	-0.73	-0.63	-0.73
192259	Plb1	1	-0.6	-0.4	-0.6	-0.6	-0.6	-0.6	-0.6	-0.6
287610	Lpo	0.5	-0.1	-0.4	-0.6	-0.6	-0.6	-0.6	-0.6	-0.6
691810	Pla2g4c	0.73	-0.47	-0.27	-0.97	-0.17	-0.97	-0.87	-0.37	-0.97
25440	Fabp6	0.67	-0.23	-0.43	0.07	-1.03	-0.13	-0.73	-1.33	-1.23
286933	Obp2b	0.27	-0.33	0.07	0.07	-0.73	-0.43	-0.63	-0.93	-0.93
24296	Cyp1a1	-0.67	-0.07	0.73	-0.27	0.73	-1.27	0.73	-0.57	-0.67
363654	Tmigd1	0.83	-0.57	-0.27	0.43	0.73	0.53	0.53	0.23	-0.77
100359675	Alpp	-0.9	0.9	0	0.4	0.3	0.3	0.1	-0.1	1
114246	Trpv6	-0.57	1.13	-0.57	1.73	1.53	1.23	0.23	-0.57	0.93
24450	Hmgcs2	-0.8	0.2	0.6	0.7	0.6	0.5	0.5	1	1.3
679759	Rpl32-ps1	0.17	-0.33	0.17	0.07	0.67	0.67	0.87	0.67	0.67
503084	RGD1565133	-0.23	0.27	-0.03	0.77	0.77	0.67	0.07	0.57	0.37
360718	Popdc2	-0.47	0.33	0.13	1.03	0.93	1.23	0.13	0.53	0.73
171432	Tmem14c	0.3	-0.1	-0.2	0.8	0.5	0.4	0.5	1	0.6
500744	LOC500744	-0.03	0.37	-0.33	0.87	0.87	0.87	0.87	0.57	0.17
100314046	Mir194-1	0.1	0.3	-0.4	0.8	1.1	0.9	0.7	0.3	0.6
25279	Cyp24a1	0	0	0	0.9	1.2	0.7	0.5	0.4	0
117033	Mmp12	-0.07	-0.07	0.13	0.73	0.93	0.63	0.63	0.63	0.03
266730	Slc17a3	0	0	0	0.6	0.9	0.9	0.5	0.6	0
287910	Ccl6	-0.17	0.13	0.03	0.63	0.73	0.63	0.43	0.33	0.03
25694	Has2	0.13	0.03	-0.17	0.43	0.73	0.83	0.53	0.93	-0.07
83817	Ache	0.3	-0.1	-0.2	0.5	0.6	0.6	0.7	0.7	0.3
170582	Fgf19	0.77	-0.43	-0.33	1.27	1.47	1.37	1.17	0.97	0.07
299139	Slc38a6	0.13	-0.07	-0.07	0.73	0.23	0.53	0.63	0.63	0.83
361588	Lrrc28	0.13	0.13	-0.27	0.63	0.53	0.33	0.63	0.53	0.83
25438	Eno3	-0.2	0.2	0	0.3	0.5	0.6	0.7	0.4	0.6
315097	RGD1561328	-0.1	0.2	-0.1	0.5	0.7	0.6	0.4	0.4	0.8
59329	Sik1	-0.27	0.03	0.23	0.53	0.53	0.43	0.73	0.73	0.73
501072	Acaa1b	-0.43	-0.03	0.47	0.87	0.87	0.67	0.87	1.17	1.17
500181	LOC500181	-0.47	-0.07	0.53	0.73	0.83	0.73	0.73	0.83	0.83
361819	RGD1566085	-0.27	-0.07	0.33	0.43	0.63	0.53	0.63	0.53	0.93
25073	Scarb1	-0.27	0.03	0.23	0.73	0.53	0.63	0.53	0.53	0.73
315973	Acad11	-0.27	0.13	0.13	0.53	0.63	0.73	0.43	0.63	0.83
293135	Lrrc32	-0.03	0.07	-0.03	0.77	0.87	0.67	0.57	0.47	0.37
287561	Ccl7	-0.07	0.03	0.03	0.63	0.83	0.63	0.63	0.33	0.33
117096	Nlgn2	-0.17	0.13	0.03	0.73	0.93	0.73	0.53	0.53	0.53
100909664	LOC100909664	-0.1	0.1	0	0.7	0.9	0.8	0.4	0.5	0.5
116642	Slc28a1	-0.07	0.03	0.03	0.63	0.83	0.83	0.43	0.43	0.43
94341	Kcnj13	0	0	0	0.7	1	1.1	0.6	0.7	0.5
305826	Samd4a	-0.2	0.1	0.1	0.8	0.7	0.9	0.4	0.4	0.5
360468	Emp2	-0.3	0.1	0.2	0.8	0.9	1	0.4	0.4	0.7
503214	Rbpms2	-0.07	-0.07	0.13	0.83	0.83	0.73	0.43	0.43	0.63
25361	Vcam1	0.2	-0.2	0	0.9	1.2	1	0.6	0.7	0.3
368066	Inmt	0.2	-0.2	0	0.7	1	0.9	0.5	0.5	0.6
60584	Lif	0.13	-0.17	0.03	0.93	1.33	0.73	0.83	0.83	0.73
498425	Zrsr1	0.17	-0.23	0.07	0.77	0.97	0.77	0.87	0.67	0.57
114105	Cxcl2	0.07	-0.13	0.07	1.07	1.37	1.07	1.07	0.97	0.77
24498	Il6	0.1	-0.2	0.1	1	1.3	1	0.8	0.9	0.5
29582	Mgat3	0.07	-0.03	-0.03	0.67	0.77	0.47	0.57	0.67	0.47
81503	Cxcl1	-0.03	-0.23	0.27	0.97	1.17	0.67	0.67	0.77	0.57
54242	Cpa3	-0.2	-0.1	0.3	0.7	0.9	0.7	0.5	0.7	0.4
288593	Ccl24	-0.23	-0.03	0.27	0.77	1.17	0.87	0.67	0.77	0.57
290338	Adamdec1	-0.2	0	0.2	0.7	0.9	0.6	0.6	0.6	0.3
60665	Cxcl5	-0.23	-0.03	0.27	0.67	0.97	0.67	0.47	0.57	0.27
287710	Ptrf	-0.3	0.1	0.2	0.8	0.9	0.9	0.5	0.7	0.4
282821	Has1	-0.03	-0.23	0.27	0.57	0.97	0.77	0.57	0.67	0.37
170637	Samsn1	-0.1	-0.1	0.2	0.6	0.6	0.6	0.6	0.4	0.2
304485	Hvcn1	-0.1	-0.2	0.3	0.6	0.6	0.6	0.7	0.4	0.3
366749	LOC366749	-0.23	-0.23	0.47	1.07	1.27	1.27	1.17	0.87	0.77
304988	Ifi204	-0.1	-0.1	0.2	0.6	0.7	0.4	0.6	0.4	0.2
367743	Praf2	-0.2	0	0.2	0.4	0.4	0.6	0.7	0.6	0.5
304322	Chst12	-0.33	-0.03	0.37	0.57	0.67	0.77	1.07	0.77	0.57
287827	Armc7	-0.13	-0.03	0.17	0.47	0.57	0.77	0.77	0.57	0.67
311406	Dusp2	-0.1	0	0.1	0.7	0.8	0.8	0.8	0.6	0.3
100363005	LOC100363005	0	0	0	0.6	0.6	0.7	1	0.6	0.3
24701	Pygm	0	0	0	0.7	0.9	0.9	1	0.8	0.6
353250	Niacr1	-0.07	-0.07	0.13	0.53	0.73	0.63	0.83	0.63	0.33
25579	Map3k12	0	-0.1	0.1	0.5	0.7	0.6	0.9	0.7	0.5
361614	Fam168a	0.13	-0.27	0.13	0.53	0.63	0.63	0.63	0.63	0.83
687101	LOC687101	0.1	-0.3	0.2	0.4	0.4	0.6	0.4	0.6	0.6
499669	Celf3	0.23	-0.27	0.03	0.63	0.53	0.73	1.13	1.13	0.83
287454	Alox12	0	-0.2	0.2	0.9	0.8	1.1	1.3	1.3	0.9
64364	Pllp	0.1	-0.1	0	0.8	0.6	0.8	1	1.1	1.2
690987	Gys1	0.03	-0.07	0.03	0.63	0.63	0.73	1.03	1.03	0.93
304971	Tomm40l	0.03	-0.17	0.13	0.53	0.43	0.53	0.63	0.73	0.63
140860	Slco2b1	0.1	-0.2	0.1	0.6	0.5	0.6	0.7	0.8	0.7
314405	Otub2	0	0.1	-0.1	0.5	0.5	0.6	0.8	0.4	0.7
315591	Tbcel	-0.03	0.17	-0.13	1.07	0.77	0.87	0.87	0.67	0.67
296757	Napepld	-0.23	0.17	0.07	0.67	0.67	0.67	0.57	0.27	0.77
499702	Synpo2	-0.2	0.1	0.1	0.9	1	1	1	0.6	0.8
297096	Snx10	-0.2	0.1	0.1	0.9	0.9	0.8	0.9	0.5	0.8
115771	Usp2	-0.3	0.2	0.1	0.9	1	0.9	0.8	0.4	0.7
246208	Ifi47	-0.07	0.13	-0.07	0.83	0.73	0.83	0.53	0.53	0.73
171497	Sgk2	-0.17	0.23	-0.07	1.23	1.03	1.03	0.73	0.63	1.03
25553	Slc6a4	-0.13	0.17	-0.03	0.67	0.77	0.67	0.37	0.37	0.57
313615	Paqr7	-0.33	0.17	0.17	0.77	0.67	0.67	0.67	0.47	0.77
315644	Bco2	-0.23	0.17	0.07	0.77	0.77	0.57	0.67	0.57	0.77
65202	Slc13a2	-0.53	0.27	0.27	1.27	1.47	1.37	0.87	0.97	1.47
500973	Slc37a2	-0.43	0.37	0.07	1.27	1.37	1.07	0.87	0.77	1.17
64532	Adcy5	-0.3	0.2	0.1	0.6	0.7	0.6	0.5	0.4	0.5
24582	Myh11	-0.3	0.2	0.1	0.7	0.8	0.8	0.6	0.6	0.7
288664	Fam109a	-0.27	0.23	0.03	0.63	0.63	0.63	0.53	0.53	0.53
25402	Casp3	-0.1	0.1	0	0.6	0.7	0.6	0.4	0.5	0.6
54702	Egln3	-0.2	0.1	0.1	0.8	1	0.9	0.7	0.7	0.9
292737	Blvrb	-0.13	0.07	0.07	0.77	0.97	0.97	0.67	0.77	0.77
303333	Slc46a1	-0.03	0.07	-0.03	0.57	0.67	0.67	0.47	0.47	0.77
65035	Nr1i3	-0.1	0.1	0	0.7	0.7	0.8	0.6	0.5	0.9
691024	Fam219a	-0.1	0	0.1	0.5	0.6	0.6	0.4	0.4	0.6
619561	Acsf2	-0.17	0.03	0.13	1.03	1.13	1.13	0.73	0.83	1.33
307897	Sdr42e1	-0.2	0.1	0.1	0.7	0.9	0.8	0.7	0.5	0.9
364018	Ncf2	-0.1	-0.1	0.2	0.7	0.7	0.5	0.6	0.5	0.6
290648	Pgpep1	-0.1	-0.1	0.2	0.5	0.7	0.6	0.6	0.6	0.7
296733	Chpf2	0.1	0	-0.1	0.9	0.6	0.6	0.6	0.7	0.7
294408	Asf1a	0.1	0	-0.1	0.7	0.6	0.5	0.5	0.5	0.6
305625	Mfsd7	0.03	0.03	-0.07	0.73	0.63	0.63	0.53	0.73	0.43
685269	Itga2b	-0.03	0.07	-0.03	0.67	0.67	0.77	0.57	0.77	0.47
316064	Oxsr1	-0.07	0.03	0.03	0.73	0.53	0.63	0.53	0.63	0.43
309208	Lrrc10b	-0.07	0.13	-0.07	0.93	0.53	0.93	0.83	1.03	0.63
317468	Tlr7	-0.07	0.13	-0.07	1.03	0.83	1.13	1.13	1.13	0.83
100362216	LOC100362216	0	0.1	-0.1	0.8	0.6	0.7	0.6	0.9	0.8
301512	Aamp	-0.1	0	0.1	0.5	0.4	0.6	0.5	0.7	0.6
192272	Acot2	-0.17	0.03	0.13	0.53	0.43	0.63	0.53	0.73	0.73
116721	Abcc5	-0.23	0.17	0.07	0.87	0.67	0.77	0.87	0.87	0.97
114027	Dao	-0.43	0.27	0.17	0.97	0.77	0.87	0.87	1.07	1.17
313593	Ago3	-0.17	0.13	0.03	0.73	0.53	0.83	0.93	0.93	1.03
289533	Ugt2a3	-0.2	0.3	-0.1	0.6	0.6	0.8	0.7	0.8	0.9
25747	Ppara	-0.33	0.27	0.07	0.77	0.87	1.07	0.87	0.87	1.07
498192	RGD1560398	-0.17	0.03	0.13	0.63	0.53	0.73	0.63	0.53	0.93
301517	Cyp27a1	-0.13	0.07	0.07	0.57	0.47	0.67	0.67	0.47	0.87
497983	Fam117a	-0.13	-0.03	0.17	0.77	0.47	0.77	0.77	0.67	0.97
100036765	Ccdc92	-0.37	0.13	0.23	0.73	0.73	0.73	0.93	0.73	1.13
294072	Slc35g1	-0.27	0.23	0.03	0.63	0.73	0.63	0.73	0.53	0.93
291567	Ppargc1b	-0.1	0.1	0	0.4	0.6	0.6	0.7	0.5	0.8
679863	LOC679863	0.17	-0.13	-0.03	0.77	0.67	0.87	0.97	0.77	0.77
503122	Cyp4f40	0.1	-0.1	0	0.7	0.7	0.9	0.9	0.8	0.8
315136	Cbx6	-0.17	-0.17	0.33	0.83	0.83	0.93	0.63	0.83	0.83
58819	Txnrd1	-0.07	-0.07	0.13	0.63	0.53	0.63	0.53	0.63	0.63
50681	Acox1	-0.03	-0.03	0.07	0.67	0.57	0.67	0.47	0.67	0.67
81680	Lifr	-0.13	-0.03	0.17	0.97	0.97	0.87	0.67	0.87	0.87
689954	Setd7	-0.03	0.07	-0.03	0.77	0.67	0.77	0.57	0.57	0.57
361267	Akr1cl	0.03	0.03	-0.07	1.53	1.43	1.63	1.13	1.13	1.13
497811	Xdh	0	0	0	0.6	0.6	0.6	0.4	0.5	0.6
295362	Gstm6l	0	0	0	1.3	1.2	1.4	0.8	1	1.1
25152	Map1a	0	0	0	0.8	0.6	0.9	0.5	0.6	0.7
292767	Catsperg1	0.03	-0.07	0.03	0.83	0.73	0.83	0.73	0.63	0.53
114031	Fstl3	-0.03	-0.13	0.17	0.97	0.97	0.97	0.77	0.67	0.67
300191	Slc48a1	-0.17	-0.07	0.23	1.23	1.23	1.13	1.03	0.93	0.93
303407	Gdpd1	0.03	-0.07	0.03	0.73	0.73	0.63	0.53	0.53	0.53
315509	Jam3	0.03	-0.17	0.13	1.13	1.13	1.13	0.73	0.83	0.93
499241	Scube2-ps1	-0.03	-0.13	0.17	0.77	0.87	0.77	0.67	0.77	0.57
24603	Npr1	0.13	-0.17	0.03	0.63	0.63	0.73	0.53	0.53	0.63
170906	Zdhhc7	0.07	-0.13	0.07	0.67	0.57	0.67	0.57	0.57	0.67
117519	Keap1	0.1	0	-0.1	0.6	0.6	0.5	0.6	0.4	0.6
307472	Sh3rf2	0.1	0	-0.1	0.9	1	0.8	1	0.7	1
171063	Gtf3c1	0.1	0	-0.1	0.6	0.6	0.5	0.7	0.5	0.6
81812	Thra	0.13	-0.07	-0.07	0.53	0.63	0.53	0.63	0.43	0.73
361338	Fech	0.17	-0.13	-0.03	0.67	0.77	0.67	0.67	0.47	0.67
83516	Ppargc1a	0.17	-0.03	-0.13	0.97	1.07	0.97	0.87	0.57	0.97
291540	Cep76	0.17	-0.13	-0.03	0.67	0.67	0.57	0.77	0.57	0.67
114106	Bcmo1	0.13	-0.17	0.03	0.73	0.93	0.83	0.93	0.73	0.83
360537	Tom1l2	0.1	0	-0.1	0.7	0.7	0.6	0.6	0.6	0.5
296651	Psmd5	0.17	-0.03	-0.13	0.87	0.97	0.87	0.87	0.87	0.77
290626	Haus8	0.23	-0.07	-0.17	0.73	0.83	0.73	0.63	0.73	0.63
292548	Zfp418	0.27	0.17	-0.43	1.27	1.37	1.17	1.17	1.07	1.27
29421	Urod	0.1	-0.1	0	0.5	0.6	0.5	0.6	0.6	0.8
287451	Slc16a13	0.03	-0.07	0.03	0.63	0.83	0.73	0.73	0.63	1.03
289745	Mtfp1	0	0.1	-0.1	0.6	0.8	0.6	0.7	0.6	0.9
50676	Slc6a12	0	0	0	1.7	1.2	1.4	1.7	1.6	1.4
60378	Lypd3	0.13	-0.07	-0.07	1.23	0.73	1.03	1.03	0.93	1.03
304743	Ccdc93	0.03	-0.07	0.03	0.63	0.73	0.53	0.73	0.63	0.63
502503	Serf1	0	0	0	0.8	1	0.7	0.9	0.7	0.7
313391	Atg4c	-0.03	-0.03	0.07	0.57	0.77	0.57	0.87	0.67	0.67
313262	Pappa	-0.23	0.07	0.17	0.87	0.87	0.97	0.77	0.77	0.77
114101	Cds2	-0.13	0.07	0.07	0.67	0.67	0.77	0.67	0.57	0.67
25558	Stxbp1	-0.13	0.07	0.07	0.77	0.77	0.97	0.77	0.67	0.57
308923	Ahi1	-0.1	0	0.1	0.5	0.5	0.6	0.6	0.6	0.4
308709	Synm	-0.13	-0.03	0.17	0.77	0.87	0.97	0.87	0.87	0.77
292406	Thbs2	-0.33	0.17	0.17	1.57	1.87	1.47	1.87	1.67	1.27
25026	Adm	-0.2	0.1	0.1	1.6	1.5	1.3	1.5	1.3	0.9
29639	Fxyd2	-0.4	0	0.4	1.1	1.3	1.2	1.3	1.1	1
29527	Ptgs2	-0.13	-0.03	0.17	0.77	0.97	0.77	0.87	0.77	0.67
171090	Giot1	-0.2	-0.1	0.3	1.1	1.2	1.1	1.3	1	0.9
24471	Hspb1	-0.23	-0.03	0.27	0.87	0.77	0.77	0.97	0.77	0.57
25739	Pygb	-0.13	0.07	0.07	0.47	0.57	0.67	0.77	0.77	0.67
293650	Tcirg1	-0.17	0.03	0.13	0.63	0.73	0.63	0.83	0.83	0.73
302980	Fahd1	-0.17	0.03	0.13	0.93	0.83	0.83	1.33	1.03	1.03
297960	Rragd	-0.13	0.07	0.07	0.77	0.77	0.87	1.07	0.77	0.77
25621	Cd81	-0.17	0.03	0.13	0.53	0.63	0.63	0.53	0.53	0.63
362278	Tmem189	-0.2	0	0.2	0.7	0.7	0.7	0.7	0.7	0.8
58936	Plk3	-0.2	0	0.2	0.7	0.7	0.8	0.8	0.7	0.8
287110	Tbc1d24	-0.27	0.03	0.23	0.73	0.73	0.83	0.83	0.63	0.83
298003	Galt	-0.3	0.1	0.2	0.7	0.7	0.8	0.9	0.8	0.8
24645	Pgm1	-0.33	0.07	0.27	0.77	0.87	0.97	1.07	0.97	0.97
292787	Lin37	-0.03	-0.13	0.17	0.67	0.57	0.57	0.67	0.67	0.77
117533	Gmpr	-0.07	-0.07	0.13	0.73	0.53	0.53	0.83	0.63	0.63
361223	Fgd3	-0.07	-0.07	0.13	0.73	0.63	0.63	0.83	0.73	0.73
25177	Fhl1	-0.1	0	0.1	0.8	0.7	0.7	0.8	0.7	0.6
113894	Sqstm1	-0.07	-0.07	0.13	0.63	0.63	0.63	0.63	0.63	0.53
300115	Arhgap8	-0.07	-0.07	0.13	0.73	0.63	0.63	0.73	0.63	0.63
24192	Akr1b1	-0.07	-0.17	0.23	1.43	1.33	1.13	1.43	1.33	1.13
306327	Tmem38a	0.03	-0.17	0.13	0.73	0.73	0.53	0.73	0.73	0.63
685357	Baiap2l2	-0.07	-0.07	0.13	0.93	0.93	0.63	0.83	0.93	0.93
308431	Phldb3	0.1	0	-0.1	0.6	0.6	0.6	0.5	0.5	0.7
300053	KIFC2	0.07	-0.03	-0.03	0.77	0.87	0.87	0.67	0.67	0.87
367323	Nudt12	0.17	-0.03	-0.13	0.87	0.97	0.97	0.87	0.77	0.97
305264	Ugt2b10	0.07	-0.03	-0.03	1.07	0.97	1.07	0.97	0.77	1.07
691688	Eid3	0.03	0.03	-0.07	0.83	0.73	0.73	0.63	0.73	0.83
362282	Pck1	-0.23	0.27	-0.03	2.87	2.97	2.67	2.27	1.97	2.57
116724	Epb41l3	-0.03	0.07	-0.03	0.67	0.77	0.67	0.67	0.57	0.67
360721	Fam162a	-0.07	0.13	-0.07	1.03	1.13	0.93	0.93	0.83	0.93
287532	Slc43a2	-0.17	0.13	0.03	1.13	1.13	1.03	1.03	0.93	1.03
363886	Cnpy4	-0.1	0	0.1	0.9	0.9	0.9	0.9	0.7	0.8
306247	Il17rb	-0.03	-0.03	0.07	1.27	1.27	1.17	1.27	0.97	1.17
689161	Gabarapl1	0	0	0	0.6	0.6	0.6	0.6	0.4	0.5
287824	Trim47l	0	0	0	1.5	1.4	1.2	1.3	1.2	1.2
171347	Mat2a	-0.03	-0.03	0.07	0.77	0.87	0.87	0.97	0.67	0.77
289185	Creg1	0	-0.1	0.1	1.1	1.3	1.5	1.5	1.1	1.3
311114	Klhl23	-0.03	0.07	-0.03	0.77	0.97	0.97	1.07	0.87	0.97
114507	Slc5a3	-0.03	-0.03	0.07	0.87	0.87	0.87	0.97	0.97	0.77
29455	Gdf15	-0.07	-0.07	0.13	1.13	1.23	1.13	1.43	1.23	1.13
259274	Nmt1	0	0	0	0.7	0.8	0.7	0.9	0.8	0.6
300664	Abcg4	0	0	0	0.5	0.6	0.6	0.7	0.6	0.5
261737	Sfxn5	0.07	0.07	-0.13	0.87	1.07	0.87	1.17	0.97	0.87
257644	Zwint	0	0.1	-0.1	1	1	0.9	1.1	0.9	0.9
288444	Hsph1	-0.07	0.03	0.03	0.93	0.93	0.83	1.13	0.83	0.83
286922	Fads3	-0.07	0.03	0.03	0.83	0.73	0.73	0.93	0.73	0.83
619581	Nicn1	0.07	-0.03	-0.03	0.77	0.67	0.67	0.87	0.67	0.77
282634	Pxmp4	0.1	0	-0.1	0.7	0.6	0.6	0.8	0.7	0.7
83537	Smpd2	0.1	0	-0.1	0.6	0.6	0.6	0.8	0.6	0.6
29422	Chrne	0.17	-0.03	-0.13	1.77	1.87	1.87	2.27	1.87	1.77
361634	Ccp110	0.03	0.03	-0.07	0.53	0.53	0.63	0.63	0.63	0.53
691277	LOC691277	0.07	-0.03	-0.03	0.77	0.67	0.77	0.87	0.87	0.77
100360180	LOC100360180	0.07	-0.03	-0.03	0.77	0.77	0.77	0.77	0.87	0.77
65183	Aldh3a2	0.07	-0.03	-0.03	0.57	0.57	0.67	0.57	0.67	0.67
293860	Flna	-0.07	0.03	0.03	0.53	0.63	0.63	0.63	0.63	0.53
65197	Slc2a5	-0.17	0.03	0.13	0.93	1.03	1.13	1.03	1.13	1.13
89813	Pdk4	-0.07	0.03	0.03	0.73	0.93	0.93	0.93	0.93	0.93
291848	Mmp15	-0.1	0.1	0	0.6	0.7	0.6	0.7	0.7	0.7
360772	Zfand2a	-0.2	0.1	0.1	0.7	0.8	0.8	0.8	0.8	0.8
299858	Lrp1	-0.13	0.07	0.07	0.67	0.67	0.57	0.67	0.67	0.77
24188	Aldh1a1	-0.53	0.37	0.17	2.47	2.27	2.27	2.47	2.47	2.57
192227	Ptgr1	-0.23	0.07	0.17	1.57	1.57	1.57	1.57	1.57	1.57
304740	Clasp1	0.07	-0.03	-0.03	0.67	0.77	0.67	0.67	0.57	0.67
24451	Hmox1	0.1	0	-0.1	1.8	1.9	1.8	1.8	1.6	1.6
64390	Prpsap1	0.03	-0.07	0.03	0.73	0.83	0.83	0.83	0.73	0.83
24314	Nqo1	0.17	-0.13	-0.03	2.37	2.47	2.37	2.57	2.37	2.37
292710	Ethe1	0.07	0.07	-0.13	0.87	0.87	0.87	0.87	0.87	0.87
296271	Srxn1	0.07	0.07	-0.13	1.07	1.07	1.07	0.97	1.07	1.07
290551	Chdh	0.17	-0.03	-0.13	1.67	1.67	1.87	1.57	1.57	1.67
288454	Slc46a3	0.03	0.03	-0.07	1.03	0.93	0.93	0.93	0.83	1.13
314312	Entpd5	0.03	0.13	-0.17	1.83	1.73	1.63	1.73	1.53	1.93
499015	Serac1	0	0.1	-0.1	1.1	1	0.9	1	1	1.2
116486	Sec14l2	-0.07	-0.07	0.13	1.53	1.53	1.63	1.53	1.53	1.63
366792	Mettl7b	-0.03	0.07	-0.03	1.07	0.97	1.07	1.07	0.87	1.17
29487	Gstt2	0	0	0	0.8	0.8	0.8	0.8	0.8	1
24552	Me1	-0.03	0.07	-0.03	0.87	0.87	0.87	0.87	0.87	1.07
25315	Ephx1	-0.1	0.1	0	1.6	1.6	1.7	1.7	1.6	2
81530	Pdk2	-0.1	0.1	0	1.1	1	1.1	1	1.1	1.3
24591	Neu1	0	0	0	1	0.9	1	0.9	1	1.1
24311	Ddc	-0.27	0.13	0.13	1.73	1.63	1.73	1.73	1.53	1.83
24423	Gstm1	-0.17	0.03	0.13	2.33	2.23	2.43	2.53	2.13	2.53
307096	Akr1c19	-0.2	0.2	0	1.5	1.4	1.4	1.5	1.3	1.7
171562	Ero1l	-0.1	0.1	0	1.1	1	1.1	1.1	1	1.2
308843	Tsku	-0.17	0.23	-0.07	1.53	1.43	1.43	1.53	1.43	1.63
60418	Gde1	-0.1	0.1	0	0.8	0.8	0.8	0.9	0.8	0.9
26760	Akr7a3	-0.13	0.17	-0.03	1.47	1.57	1.57	1.67	1.47	1.67
362883	Slc35e3	-0.03	0.07	-0.03	1.07	1.07	1.07	1.17	0.97	1.17
29253	Maoa	-0.13	0.17	-0.03	1.57	1.47	1.47	1.77	1.47	1.77
360575	Ankrd13b	-0.07	0.03	0.03	0.63	0.53	0.53	0.63	0.63	0.63
295037	Mgst2	-0.13	0.07	0.07	1.07	0.97	1.07	1.07	1.07	1.17
290277	Cryl1	-0.07	0.03	0.03	0.73	0.63	0.73	0.73	0.73	0.73
57298	Gstm3	-0.07	0.03	0.03	1.83	1.63	1.73	1.93	1.83	2.03
292935	Htatip2	-0.13	-0.03	0.17	2.47	2.37	2.27	2.57	2.37	2.47
363465	Pir	-0.03	0.07	-0.03	2.07	1.97	1.97	2.07	1.87	1.87
29739	Gclm	0.07	-0.03	-0.03	1.07	0.97	1.07	0.97	0.97	1.07
83472	Ugdh	0.03	-0.07	0.03	1.33	1.23	1.33	1.23	1.23	1.33
286921	Akr1b8	0	0	0	1.3	1.2	1.3	1.2	1.3	1.3
286989	Ugt2b7	0	0.3	-0.3	4.5	4.4	4.5	4.4	4.3	4.8
25283	Gclc	0.03	0.03	-0.07	2.13	2.03	2.13	2.13	2.03	2.13
690212	Slc16a5	0	0	0	4.1	4	3.9	4.1	3.8	4.3
365841	Slc25a44	-0.03	-0.03	0.07	0.67	0.67	0.67	0.77	0.67	0.87
140668	Abcc3	-0.03	-0.03	0.07	0.87	0.87	0.87	0.97	0.87	1.07
57300	Aadac	0.03	-0.07	0.03	1.23	1.23	1.23	1.33	1.13	1.43
296973	Bpgm	0.03	0.03	-0.07	0.83	0.73	0.83	0.93	0.73	0.93
24377	G6pd	0.07	0.07	-0.13	1.07	1.07	1.07	1.17	0.97	1.17
29464	Slc6a6	0.03	0.03	-0.07	1.03	0.93	1.13	1.13	1.13	1.13
301221	Mocs1	0.03	0.03	-0.07	0.93	0.83	0.93	1.03	0.93	1.03
362642	Pqlc2	0.03	0.03	-0.07	0.53	0.63	0.63	0.63	0.63	0.73
498131	N4bp2l1	-0.03	-0.03	0.07	0.57	0.57	0.57	0.67	0.67	0.77
54398	Ppt2	-0.03	-0.03	0.07	0.67	0.77	0.77	0.97	0.87	0.87
362087	Ubac1	0	0	0	0.6	0.6	0.6	0.7	0.7	0.7
246302	Pcyox1	-0.03	-0.03	0.07	1.17	1.27	1.17	1.47	1.37	1.47
300051	Slc39a4	0.03	-0.07	0.03	1.63	1.43	1.43	1.83	1.93	2.03
24516	Jun	0.03	-0.07	0.03	0.63	0.53	0.53	0.73	0.73	0.63
298071	Nans	0.03	-0.07	0.03	0.53	0.53	0.43	0.63	0.63	0.63
288585	Rabl5	0.03	-0.07	0.03	0.83	0.73	0.63	0.83	0.83	0.83
171493	Osgin1	0.13	-0.17	0.03	1.33	1.23	1.33	1.43	1.33	1.53
362645	Atp13a2	-0.1	0.1	0	0.7	0.8	0.7	0.8	1	1.1
361348	Mro	-0.17	0.23	-0.07	1.43	1.63	1.63	1.83	1.63	2.23
310756	Mov10	-0.07	0.03	0.03	0.43	0.53	0.53	0.63	0.63	0.73
29336	Sigmar1	-0.07	0.03	0.03	0.53	0.53	0.53	0.73	0.73	0.83
304410	Gatsl2	-0.1	0.1	0	0.7	0.7	0.6	0.8	0.8	0.9
116509	Slc6a9	-0.2	0.1	0.1	1	1	1	1.2	1.1	1.3
94167	Prdx6	-0.07	0.03	0.03	0.63	0.53	0.63	0.53	0.63	0.83
24260	Chrm3	-0.17	0.13	0.03	0.93	0.83	0.83	0.83	0.93	1.13
494499	Gsta5	-0.07	0.13	-0.07	0.93	0.83	0.83	0.83	1.03	1.13
311350	Tmem62	-0.03	0.07	-0.03	0.67	0.57	0.67	0.67	0.67	0.87
362526	Dnajc25	-0.03	0.07	-0.03	0.87	0.67	0.77	0.87	0.77	0.97
29318	Ddt	-0.07	0.03	0.03	0.83	0.63	0.73	0.73	0.73	0.93
25303	Abcc2	-0.03	0.17	-0.13	0.67	0.77	0.87	0.77	0.67	0.97
171564	Pbld1	-0.03	0.17	-0.13	0.77	0.67	0.77	0.67	0.67	0.87
362942	Slc52a2	-0.13	0.27	-0.13	0.97	0.87	0.97	0.87	0.97	1.07
100361492	LOC100361492	-0.43	0.37	0.07	1.47	1.27	1.57	1.27	1.27	1.87
24362	Fbp1	-0.27	0.23	0.03	0.83	0.83	0.83	0.63	0.73	0.93
299338	Exoc3l4	-0.27	0.23	0.03	0.93	0.83	0.83	0.73	0.63	1.03
494500	Gsta5	-0.2	0.2	0	1.1	1	1.1	0.9	0.9	1.1
24424	Gstm2	-0.23	0.27	-0.03	0.97	0.67	0.77	0.77	0.77	1.07
500956	LOC500956	-0.2	0.2	0	0.7	0.6	0.7	0.8	0.6	0.9
170898	Tmlhe	-0.17	0.23	-0.07	0.63	0.53	0.63	0.63	0.53	0.83
316400	Pgap1	-0.07	0.13	-0.07	0.63	0.53	0.63	0.73	0.53	0.83
84484	Slc4a4	-0.1	0.2	-0.1	0.7	0.6	0.6	0.6	0.5	0.7
287607	Mtmr4	-0.1	0.2	-0.1	0.7	0.7	0.7	0.7	0.5	0.8
287285	Shroom1	-0.17	0.23	-0.07	0.83	0.73	0.63	0.63	0.63	0.93
29646	Adh4	-0.83	1.07	-0.23	3.17	2.97	2.67	2.97	2.47	3.57
365699	Nadkd1	-0.1	0.1	0	0.6	0.7	0.5	0.6	0.4	0.7
296623	Fam73b	-0.07	0.03	0.03	0.63	0.63	0.53	0.53	0.53	0.63
499689	Gstm4	-0.07	0.03	0.03	0.93	0.83	0.83	0.73	0.73	0.93
307838	Chst4	-0.13	0.17	-0.03	1.17	1.27	1.17	1.17	0.97	1.27
25634	G6pc	-0.2	0.4	-0.2	2.3	2.5	2.4	2.2	2	2.7
303577	Acbd4	-0.13	0.17	-0.03	0.77	0.97	0.77	0.87	0.67	1.07
191574	Akr1c14	-0.13	0.17	-0.03	0.77	0.87	0.67	0.77	0.67	0.97
298848	Mapre3	-0.23	0.27	-0.03	1.47	1.57	1.47	1.47	1.37	1.97
155205	Slc36a1	-0.1	0.1	0	0.5	0.6	0.6	0.6	0.5	0.7
301596	Heatr7b1	-0.2	0.1	0.1	1.2	1.3	1.2	1.3	1.1	1.5
689625	Slc25a45	-0.07	0.13	-0.07	1.73	1.83	1.53	1.53	1.13	1.93
436582	Atp6v0e2	-0.1	0.1	0	0.8	0.8	0.7	0.7	0.6	1
83808	Ugt2b15	-0.1	0.2	-0.1	2.2	2.1	1.9	1.8	1.7	2.5
29215	Arg2	-0.1	0.1	0	0.8	0.9	0.7	0.7	0.7	0.9
63886	Abcb9	-0.03	0.07	-0.03	0.77	0.87	0.67	0.67	0.77	0.87
300089	Pmm1	-0.03	0.07	-0.03	0.77	0.67	0.47	0.67	0.57	0.57
362558	Lrp8	0.03	0.03	-0.07	0.83	0.73	0.53	0.83	0.63	0.73
300850	Gsta4	-0.2	0.1	0.1	1.3	1.1	0.9	1.3	1	1.2
361266	Akr1c12	-0.13	0.27	-0.13	1.27	0.97	0.97	1.27	0.87	1.07
81869	Gstm7	-0.1	0.2	-0.1	0.7	0.7	0.5	0.8	0.6	0.8
29623	Ugt2b37	-0.2	0.4	-0.2	1.4	1.2	1	1.4	1.3	1.5
366468	Lsm10	0.1	-0.1	0	0.6	0.6	0.6	0.8	0.6	0.8
499688	Gstm6	0	0	0	1.1	1.1	1	1.5	1	1.3
363193	Ppp2r5d	0.03	0.03	-0.07	0.43	0.63	0.53	0.63	0.73	0.73
170842	Tob1	0	0.1	-0.1	0.4	0.5	0.4	0.6	0.6	0.7
246301	Ascl3	0.03	0.13	-0.17	0.73	0.63	0.73	0.83	0.83	0.73
299285	Clmn	0.1	0.1	-0.2	0.6	0.6	0.7	0.8	0.7	0.7
288702	Unc119b	0.03	0.03	-0.07	0.53	0.53	0.53	0.73	0.73	0.63
498008	Hexim1	0.03	0.03	-0.07	0.53	0.53	0.53	0.73	0.73	0.73
361107	Actr8	0.1	0	-0.1	0.4	0.5	0.5	0.6	0.6	0.6
315484	Bbs9	0.1	0	-0.1	0.7	0.8	0.8	1	0.9	1
366360	RGD1309821	0.07	0.07	-0.13	0.57	0.57	0.57	0.77	0.67	0.77
170818	Icmt	-0.07	0.13	-0.07	0.63	0.73	0.63	0.83	0.83	0.83
362824	Mfsd12	0	0.1	-0.1	0.5	0.5	0.5	0.6	0.6	0.6
24479	Idh1	-0.07	0.13	-0.07	0.63	0.63	0.63	0.73	0.73	0.73
689414	Slc25a42	0.17	-0.03	-0.13	0.87	0.67	0.87	0.87	0.87	1.07
499768	Tbc1d13	0.13	0.03	-0.17	0.63	0.53	0.63	0.73	0.73	0.83
24426	Gstp1	0.17	-0.03	-0.13	0.67	0.57	0.67	0.77	0.87	0.97
308944	St5	0.23	-0.07	-0.17	0.63	0.73	0.73	0.83	0.83	0.83
498888	Siglec15	0.23	-0.07	-0.17	0.73	0.73	0.63	0.93	0.83	0.83
171088	Inpp5j	0.27	-0.13	-0.13	1.17	1.27	1.07	1.37	1.27	1.27
362559	Zyg11b	0.1	0	-0.1	0.4	0.6	0.5	0.6	0.5	0.6
312680	Cecr5	0.1	-0.1	0	0.4	0.5	0.4	0.6	0.6	0.6
303678	Caskin2	0.13	-0.07	-0.07	0.83	0.83	0.73	0.83	1.03	1.03
686977	RGD1624210	0.2	-0.2	0	1	0.9	0.9	0.9	1.1	1.1
500244	Aak1	0	0.1	-0.1	0.5	0.6	0.6	0.6	0.5	0.5
362737	Heatr5a	-0.03	0.17	-0.13	0.77	0.67	0.57	0.67	0.57	0.87
362378	Fam13a	0	0.1	-0.1	0.7	0.5	0.5	0.6	0.4	0.8
311617	Fitm2	0	0	0	0.6	0.5	0.5	0.6	0.4	0.7
500117	Ccdc126	-0.03	0.07	-0.03	0.77	0.67	0.47	0.57	0.47	0.77
287821	Otop3	-0.3	0.2	0.1	1.6	1.6	1.1	1.2	1	1.9
362590	Inpp5b	-0.13	0.07	0.07	0.77	0.77	0.57	0.67	0.77	0.97
310643	Efna4	-0.07	0.03	0.03	0.73	0.53	0.73	0.53	0.53	0.73
362219	Gpcpd1	-0.07	0.03	0.03	0.83	0.63	0.63	0.53	0.63	0.83
619393	Dnajc12	0.13	-0.17	0.03	0.83	0.63	0.53	1.03	0.73	0.83
315914	Morc4	0.17	-0.03	-0.13	0.97	0.97	0.77	1.17	1.07	0.77
294789	Ranbp3l	0.2	-0.1	-0.1	1.7	1.5	1.3	2	1.7	1.4
171144	Slco4a1	0	0	0	0.6	0.5	0.4	0.7	0.6	0.5
500569	Kdm1a	0.1	0	-0.1	0.6	0.5	0.5	0.8	0.8	0.6
296315	RGD1307752	0	0.1	-0.1	0.6	0.5	0.4	0.7	0.7	0.7
100909835	LOC100909835	-0.03	0.07	-0.03	0.97	0.77	0.57	1.07	1.07	1.17
29333	Cd46	-0.07	0.03	0.03	0.53	0.43	0.43	0.63	0.63	0.63
291677	Dnajc18	-0.03	0.17	-0.13	0.77	0.67	0.57	1.07	0.87	0.77
362427	Mical3	0.07	0.07	-0.13	0.67	0.77	0.47	0.67	0.47	0.47
295549	Dnajb4	0.1	0	-0.1	0.6	0.7	0.5	0.7	0.5	0.5
311802	Ssna1	0.07	0.07	-0.13	0.87	0.87	0.47	0.97	0.67	0.67
299511	Rdh16	0.07	-0.03	-0.03	0.67	0.57	0.87	0.37	0.37	0.77
367166	Hyal1	0.07	0.07	-0.13	0.77	0.67	0.87	0.57	0.37	0.67
289322	RGD1564463	-0.07	0.13	-0.07	0.83	0.93	1.13	0.93	0.33	0.93
117274	Nr0b2	0.1	0	-0.1	0.6	0.6	0.7	0.6	0.4	0.8
297342	Elmod3	-0.13	0.07	0.07	0.27	0.57	0.47	0.67	0.67	0.77
362039	Pla2g12a	-0.07	0.03	0.03	0.53	0.43	0.43	0.73	0.63	0.93
363138	Nprl2	0.1	0	-0.1	0.4	0.4	0.3	0.7	0.6	0.7
360323	RT1-N2	-0.03	0.07	-0.03	0.47	0.77	0.37	0.87	0.57	0.77
680244	Tmem139	-0.17	0.23	-0.07	0.53	0.43	0.43	0.63	0.63	0.63
362393	Antxr1	-0.27	0.23	0.03	0.63	0.63	0.63	0.63	0.63	0.43
301556	RGD1561963	-0.27	0.13	0.13	0.63	0.63	0.73	0.73	0.63	0.43
84050	Enpp2	-0.2	0.1	0.1	0.8	0.6	0.6	0.7	0.7	0.4
302671	Ap1s2	-0.23	0.17	0.07	0.57	0.87	0.77	0.87	0.57	0.47
65204	Cnn1	-0.33	0.27	0.07	0.57	0.77	0.67	0.67	0.47	0.47
25157	Plagl1	-0.2	0.2	0	0.7	0.9	0.6	0.8	0.6	0.4
307973	Def8	-0.17	0.23	-0.07	0.63	0.73	0.43	0.63	0.63	0.43
500450	Tpm2	-0.23	0.27	-0.03	0.67	0.77	0.67	0.57	0.37	0.37
296345	Jph2	-0.13	0.37	-0.23	0.87	0.87	0.67	0.57	0.47	0.57
679990	Pgm5	-0.17	0.33	-0.17	0.73	0.93	0.73	0.63	0.53	0.53
245920	Cxcl10	-0.17	0.33	-0.17	0.73	1.03	0.73	0.83	0.53	0.63
500441	RGD1561916	-0.07	0.23	-0.17	0.53	0.73	0.73	0.53	0.83	0.53
29665	P2rx7	-0.07	0.13	-0.07	0.33	0.63	0.73	0.43	0.63	0.53
63887	Nmu	-0.07	0.13	-0.07	0.33	0.33	0.63	0.53	0.63	0.63
365550	Vpreb3	-0.1	0.1	0	0.7	0.6	0.5	0.7	0.2	0.5
502757	Tas2r135	0	0	0	0.9	0.7	0.6	1.1	0.4	0.6
100911989	LOC100911989	-0.03	-0.03	0.07	0.97	0.57	1.07	0.87	0.27	0.67
361969	Fga	-0.03	-0.03	0.07	1.07	0.37	0.77	0.57	0.67	0.57
685750	Aldh8a1	-0.4	0.5	-0.1	0.6	0.6	0.4	0.3	0.1	0.9
54294	Rgs5	-0.3	0.3	0	0.6	0.7	0.7	0.4	0.4	0.6
29747	Kcnmb1	-0.47	0.33	0.13	0.63	0.73	0.93	0.53	0.43	0.53
307376	Onecut2	-0.93	0.67	0.27	0.87	0.67	0.67	0.87	0.87	1.47
308056	RGD1311933	-0.57	0.43	0.13	0.63	0.73	0.53	0.43	0.53	0.83
64621	Akp3	-2.07	1.53	0.53	2.33	2.23	1.93	1.73	1.53	2.53
362662	Rbp7	-0.77	0.53	0.23	1.23	1.23	0.93	1.03	0.83	1.43
500359	RGD1561551	-0.53	0.37	0.17	0.97	0.77	0.77	0.67	0.57	0.97
24165	Ada	-0.57	0.43	0.13	1.03	0.83	0.73	0.83	0.93	1.23
691352	LOC691352	-0.47	0.33	0.13	0.63	0.63	0.63	0.63	0.63	0.83
100912265	LOC100912265	-0.53	0.37	0.17	0.77	0.77	0.67	0.67	0.77	0.97
362972	Pnpla3	-0.43	0.27	0.17	1.07	0.77	0.67	0.77	0.67	1.07
24172	Adh1c	-1.57	1.23	0.33	2.03	1.63	1.53	2.03	1.33	2.43
24686	Prnp	-0.47	0.33	0.13	0.93	0.63	0.53	0.33	0.63	0.73
641316	Aldh4a1	-0.7	0.5	0.2	0.8	0.7	0.4	0.3	0.6	0.9
58980	Slc13a1	-0.73	0.57	0.17	0.67	0.47	0.57	0.47	0.27	0.87
288291	Tmprss15	-1.17	0.83	0.33	1.03	1.03	0.63	0.43	0.13	1.23
363455	Chrdl1	-0.57	0.33	0.23	0.73	0.73	0.63	0.53	0.23	0.53
24249	S100g	-0.63	0.57	0.07	0.97	0.87	0.67	0.57	0.17	0.87
65192	Slc27a2	-0.33	0.17	0.17	0.67	0.57	0.77	0.17	0.37	0.97
100361009	LOC100361009	-0.6	0	0.6	0.6	0.8	0.9	0.3	0.6	0.6
100359993	LOC100359993	-0.43	-0.03	0.47	0.57	0.67	0.67	0.27	0.67	0.47
299458	LOC299458	-0.63	0.17	0.47	0.67	0.77	0.87	0.47	0.77	0.47
24932	Cd4	-0.53	0.07	0.47	0.77	0.87	0.87	0.87	0.87	0.57
361537	Tyrobp	-0.33	0.17	0.17	0.67	0.77	0.57	0.67	0.57	0.47
691840	LOC691840	-0.33	0.07	0.27	0.77	0.87	0.67	0.67	0.67	0.47
500745	LOC500745	-0.57	0.13	0.43	1.13	1.13	0.93	0.83	0.83	0.53
500194	LOC500194	-0.6	0.1	0.5	0.9	0.9	0.7	0.7	0.7	0.5
192245	Hspb6	-0.3	0.1	0.2	0.5	0.6	0.6	0.6	0.4	0.4
502834	LOC502834	-0.57	0.03	0.53	0.63	0.93	0.93	0.73	0.73	0.53
116471	Igkv28	-0.53	-0.03	0.57	0.67	0.97	0.87	0.67	0.57	0.47
363827	LOC363827	-0.6	0.2	0.4	0.7	0.9	0.8	0.6	0.6	0.4
64552	Mpeg1	-0.57	0.13	0.43	0.63	0.83	0.73	0.53	0.53	0.33
100361105	LOC100361105	-0.57	0.23	0.33	1.03	1.23	0.73	0.63	1.03	0.73
64545	Icos	-0.3	0.1	0.2	0.8	0.5	1	0.8	0.6	0.4
85246	Gas7	-0.1	0	0.1	0.2	0.6	0.5	0.6	0.6	0.2
116676	Aldh1a2	-0.07	-0.27	0.33	0.63	0.43	0.43	0.73	0.73	0.33
309810	RGD1304770	-0.33	0.17	0.17	0.87	1.27	0.77	0.67	0.07	0.77
64678	Tfrc	0.07	-0.03	-0.03	0.07	0.07	0.07	1.07	0.87	0.97
293347	Gvinp1	0	0	0	0	0	0	0.8	0.7	0.6
100909962	LOC100909962	0.63	-0.17	-0.47	0.33	0.53	0.93	-0.07	-0.07	0.93
319110	Hnrnpr	-0.43	0.57	-0.13	0.77	0.27	-0.63	-0.73	0.17	-0.13
362699	Yipf4	0.3	0.2	-0.5	0	0.6	0.1	-1	0.4	0.7
