# Supplementary material for: Effects of Digested Onion Extracts on Intestinal Gene Expression: An Interspecies Comparison Using Different Intestine Models
Source: PLoS One. 2016 Sep 15;11(9):e0160719. doi: 10.1371/journal.pone.0160719 (PMC5025074; doi:10.1371/journal.pone.0160719)
Supplement: S3 Table — Effects of digested onion extracts on mRNA expression in the pig SISP model. A heatmap of these data is given in Fig 1C. (XLSX) [file pone.0160719.s003.xlsx]

## Sheet: SISP_Highest_INT_Spots_for_clus
Legend: Effects of digested onion extracts on mRNA expression in rat intestine slices
S3 Table Pig_Intestine_WOd_YOd__affected_genes
Uniqid	NAME	Wod_vs_Sd 5	Wod_vs_Sd 6	Wod_vs_Sd 7	Wod_vs_Sd 8	Yod_vs_Sd 1	Yod_vs_Sd 2	Yod_vs_Sd 4
A_72_P157066	PLEKHG4B	-0.06	0.76	1.01	-0.05	0.19	2.18	-0.33
A_72_P489672	C14H10orf128	-0.66	-0.52	1.11	-0.25	0.41	6.22	0.15
A_72_P284229	ASAP2	0.16	0.29	-0.73	0.65	0.01	3.87	0.62
A_72_P478691	AKAP5	-0.57	-0.89	0.69	0.26	0.91	0.97	-0.17
A_72_P046356	SHISA2	-0.73	-0.36	0.86	-0.34	-1.58	0.19	1.38
A_72_P264707	LOC102116102	0.54	-0.1	1.94	-0.57	-2.42	-0.1	2.69
A_72_P058931	TTNLOC100620261	0	0	2.58	0	-1.57	0	4.52
A_72_P037746	SAMD14	-0.14	-0.35	0.7	0	-0.83	0	1.27
A_72_P185211	MMP25	0	-0.92	0	0	-1.44	-0.08	1.44
A_72_P325818	C7H6orf141	0.19	-0.1	0.18	0.48	-1.28	0.79	1.52
A_72_P215532	LOC100523881	0	0	0.61	-1.1	-0.38	0	2.17
A_72_P077481	MMP12	0.23	-0.59	0.82	-0.54	0.42	-0.16	1.96
A_72_P642038	KCNE1	1.25	0	0.74	0	0	0	4.61
A_72_P136501	HOXD4	-0.09	0.4	0.76	1	-0.28	0.05	1.33
A_72_P013296	SH2D5	0.91	0.39	0.11	-0.65	-0.38	0.73	0.24
A_72_P441594	CCL8	1.15	0.34	0.18	-0.64	-0.61	-0.07	0.51
A_72_P035476	SLC5A5	0.61	-0.16	0.22	-0.62	-0.25	-0.24	0.69
A_72_P058571	LOC100625132	1.07	0.07	-0.49	-0.67	0.21	0.04	0.87
A_72_P477479	LOC100624250	1.11	0.17	-0.04	-1.1	0	0	1.13
A_72_P623533	REEP3	0.62	0.78	0.33	-0.26	0.11	-0.15	0.66
A_72_P403958	CHAC1	0.58	1.2	-0.05	-0.82	-0.28	0	0.93
A_72_P232617	CD274	1.66	0.08	0.9	0.03	-0.36	-0.18	1.06
A_72_P079161	LOC100512960	0.88	0.18	2.54	-1.39	-1.83	-0.07	-0.21
A_72_P410683	HEATR5A	0	0.04	1.84	-1.59	-0.96	0.04	-0.51
A_72_P508499	PRKG1	-0.39	-0.06	0.77	-1.04	-1.01	0.2	0.08
A_72_P336598	LOC102151338	0	-0.03	0.7	-1.58	-1.41	-0.21	0.31
A_72_P172996	SERPINA6	-0.19	0.22	1.05	-0.76	-0.89	-0.3	0.5
A_72_P375268	OGG1	-0.09	0.03	0.85	-0.63	-0.86	0	0.44
A_72_P185356	LOC101438873	-0.43	0.36	1.56	-0.7	-0.66	0.45	0.33
A_72_P240827	CBX7	-1.22	0.11	3.04	-1.67	-0.42	-0.12	0.26
A_72_P428749	B4GALT4	-0.51	0.42	3.01	-1.72	-0.47	-0.03	0.6
A_72_P230862	LOC102133987	0.45	-0.91	1.43	-1.99	-0.79	0	0
A_72_P317973	KMT2A	0.18	-0.64	1.52	-2.7	-0.24	0.01	0.24
A_72_P450194	OCSTAMP	0.65	-0.09	1.63	-2.58	-0.68	0.02	0.11
A_72_P095301	LOC101322429	0.21	-0.11	1.85	-3.08	-0.63	0.27	0
A_72_P181831	SLC35F3	0.08	0	1	-2.59	-0.11	0	0.7
A_72_P430654	LOC101927379	0.14	-0.58	1.45	-2.21	0.29	0.21	0.62
A_72_P139281	ZNF569	0	0	2.38	-3.28	0	0	-1.36
A_72_P279359	RPS27	-0.06	0.92	2.54	0.28	-0.37	-0.06	0.84
A_72_P256152	MMP3	0	1.23	1.62	0.25	0.5	-0.07	0.66
A_72_P318448	IMPG2	-0.03	0.52	3.67	0.9	1.23	-0.07	1.78
A_72_P350488	GUCY1A3	-0.49	-1.01	2.31	-0.15	0.6	-0.1	0.3
A_72_P720378	APOD	-0.61	-0.43	1.93	0.01	1.04	-0.2	0.03
A_72_P152011	LOC100739454	0.28	-0.93	1.63	-0.89	0.35	-0.09	-0.05
A_72_P302614	HAMP	-1.88	-1.07	4.54	-0.14	-1.12	0.28	0.56
A_72_P165341	ANGPTL4	-0.63	-0.12	0.79	0.31	-0.71	-0.16	0.37
A_72_P306308	MFGE8	0.37	-1.32	4.46	-0.06	-0.48	0.5	2.65
A_72_P110271	C15H2orf57	0.39	-0.04	5.18	0.24	0.84	0.75	0.05
A_72_P300459	SLA-DOB	0.56	-0.79	3.18	-0.12	-0.53	0.18	-0.61
A_72_P266022	SCD5	0	0	3.16	-0.71	-0.11	0	-1.49
A_72_P319828	Adamtsl1	0.27	0	3.68	-0.99	-0.17	0	-1.02
A_72_P229947	TMEM8B	0.14	0.07	0.99	0.7	-0.05	-0.13	-0.76
A_72_P643494	MYH7B	0.67	0.38	3.72	1.23	-0.64	-0.14	-1.04
A_72_P361198	MIR3955	0	-0.54	1.64	0.9	-0.75	0	-0.97
A_72_P327978	MECR	0.07	-0.3	0.86	0.31	-0.67	-0.13	-0.68
A_72_P048961	EPHA2	0.03	-0.02	1.42	0.35	-0.83	0.48	-1.03
A_72_P362193	CISH	0.73	0.6	1.01	-0.2	-0.06	0.19	-0.41
A_72_P142286	ADAM11	0.67	0.41	1.31	0	0	0.71	-0.14
A_72_P381033	PTGDR2	0.73	0.86	0.78	0.01	0.21	0.15	0.21
A_72_P306173	LOC100621891	0.74	0.81	0.8	0.38	-0.34	-0.12	0.39
A_72_P401673	DPF1	0.65	0.73	1.09	0	-0.66	0.2	0.08
A_72_P015401	LOC100623304	0.34	0.03	1.08	-0.69	0.33	0.77	-0.05
A_72_P414263	AQP2	0.69	0.62	1.16	-0.89	0.89	0.99	0.2
A_72_P430914	Golga7	0.63	0.06	0.97	-0.39	-0.04	0.9	0.31
A_72_P220432	ZC2HC1A	0.72	-0.21	0.84	-0.73	-0.11	-0.1	0.47
A_72_P042376	TGM5	2.05	0	2.5	-1.5	0	0	0.62
A_72_P441394	IFNG	0.93	0.66	1.83	-0.86	0.48	-0.25	0.71
A_72_P319533	PHLDA2	0.81	0.09	1.27	-0.12	-0.95	-0.01	-0.79
A_72_P302799	AREG	1.3	-0.68	1.48	-0.27	-1.1	-0.14	-0.58
A_72_P409208	GDF15	0.89	0.4	1.15	0.39	-1.1	-0.36	-0.25
A_72_P707083	ADCY5	0.62	0	0.75	0	-0.65	-0.33	0
A_72_P104716	PRDM1	0.68	-0.82	0.85	-0.11	-0.28	-0.01	-0.09
A_72_P057521	NOS2	1.25	-0.69	1.88	-0.42	-1	0.13	0.44
A_72_P054791	LOC102165808	1.09	-0.6	0.55	0	-1.11	0.11	0.62
A_72_P428459	BTG2	0.59	-0.48	1.01	0.12	-1.94	-0.31	0.33
A_72_P219917	WNT11	0.56	0.11	0.78	-0.4	-0.82	-0.28	0.59
A_72_P475363	VTCN1	-0.43	0.04	1.25	-0.68	1.04	1.69	1.91
A_72_P486731	PIGZ	-0.12	-0.01	0.6	-0.52	0.49	0.64	1.26
A_72_P608442	LOC100627925	0.43	-0.33	1.61	-0.67	1.19	2.31	1.8
A_72_P177286	CCDC122	-0.06	-0.09	0.67	-0.07	0.39	0.68	0.63
A_72_P440671	GZMA	-0.1	0.59	1.01	-0.76	0.27	-0.02	0.99
A_72_P232422	FAS	0.26	0.24	0.89	-0.6	0.1	-0.02	1
A_72_P677717	FRZB	-0.07	0.4	1.44	-0.34	0.83	-0.06	1.21
A_72_P088461	CD3G	-0.22	0.24	1.01	-0.51	0.61	-0.36	0.89
A_72_P637879	LOC100517015	-0.54	0.62	0.73	-0.52	0.07	0.08	0.83
A_72_P119141	LOC102015452	-0.28	0.81	0.6	-0.15	0.4	-0.18	0.72
A_72_P621363	KLRK1	-0.61	0.39	0.72	-0.3	0.64	-0.3	0.72
A_72_P118351	CSGALNACT2	0.24	-0.08	0.6	-0.67	0.59	-0.25	0.38
A_72_P108371	HSD3B1	0.18	-0.24	1.03	-0.6	1.01	0.47	0.71
A_72_P096991	VPS33A	-0.13	0.09	0.9	-0.81	0.89	0.54	0.22
A_72_P398358	PRICKLE2	-0.38	-0.12	1.9	-1.48	1.15	0.16	0.38
A_72_P467060	SLITRK4	-0.07	-0.09	0.6	-0.98	0.64	0	0.69
A_72_P012754	ANGEL1	-0.42	-0.3	0.74	-0.97	0.55	0.21	0.61
A_72_P192297	LOC102169802	-0.16	-0.24	0.69	-0.33	0.61	0.15	0.77
A_72_P364313	LOC100521594	-0.09	-0.4	0.79	-0.16	0.74	0.12	1
A_72_P666205	CA2	-0.35	0	0.74	-0.71	1.11	-0.11	1.29
A_72_P273434	LOC100737341	0.68	0.1	1.21	0.12	0.65	0.45	0.54
A_72_P614646	LOC100519519	0.3	-0.18	1.36	0.44	1.14	0.35	0.73
A_72_P165386	FMO1	-0.16	0.15	0.59	0.01	0.91	-0.13	0.66
A_72_P142381	P2X3R	0.36	0	0.62	0	1.11	0	0.69
A_72_P100706	RASGEF1A	0.26	-0.13	0.74	-0.19	0.59	-0.1	0.65
A_72_P411138	LOC100270682	0.27	0.23	1.21	0.18	1.02	-0.19	0.91
A_72_P450147	PLTP	-0.82	0.22	0.99	-0.23	0.85	0.06	0.05
A_72_P511948	LOC102164807	-0.65	0.27	0.78	0	0.94	0	0.26
A_72_P704987	FSIP1	-1.89	1.01	1.81	-0.23	0.62	0.5	0.98
A_72_P315103	SEC31B	-0.02	0.71	1.39	1.2	0.18	1.23	-0.48
A_72_P042411	LOC100621695	0.45	0.04	0.77	2.15	-0.59	0	0.38
A_72_P072661	ARL4A	0.64	0.04	0.61	0.78	-0.01	0.06	-0.08
A_72_P515641	POLR3H	0.11	0.07	1.03	0.88	0.87	0	0.62
A_72_P352843	SMAD5	0.27	-0.16	0.64	1.13	0.99	0.11	0.43
A_72_P192142	LOC101334587	0.19	-0.24	0.82	0.69	0.71	0.24	0.22
A_72_P361933	TMEM63A	0.61	0.3	0.84	0.83	0.86	-0.07	0.02
A_72_P194437	LOC102164650	0.52	0.18	1.08	0.93	0.71	0.11	-0.31
A_72_P567994	PAPSS2	-0.89	0.75	-0.07	0.05	-0.74	-0.31	0.47
A_72_P174886	MVP	-0.77	0.69	0.32	1.05	-0.2	-0.54	0.03
A_72_P040742	MLYCD	-0.98	0.68	0.2	0.68	-0.14	-0.43	0.2
A_72_P388838	LOC100525876	-0.63	0.75	0.89	1.12	-0.27	-0.56	0.07
A_72_P102761	PLEKHG3	-1.08	0.73	1.09	0.63	-0.09	-0.37	0.12
A_72_P140271	LOC100626534	-1.41	0.32	2.41	0.89	-0.41	-0.69	0.36
A_72_P653925	LOC100512723	-1.06	0.11	0.83	0.73	-0.15	-0.45	-0.35
A_72_P442584	FAXDC2	-1.13	0.61	0.78	0.48	-0.38	-0.27	0.67
A_72_P234597	ARPP21	-1.37	0.59	0.62	0.4	-0.59	0	0
A_72_P796547	MICAL3	-0.74	0.95	0.89	0.3	-0.47	-0.12	-0.47
A_72_P107376	LOC102324679	-1.02	0.88	0.96	0.05	-0.57	-0.16	-0.25
A_72_P324048	MTMR11	-0.68	0.41	0.48	0.73	-0.97	-0.19	-0.39
A_72_P566604	LOC102161142	-0.6	0.22	0	1.08	-0.59	-0.14	-0.31
A_72_P190321	KSR1	-0.61	0.15	0.39	1.03	-0.73	-0.15	-0.52
A_72_P477110	UNC5CL	-0.98	0.34	0.31	0.93	-0.74	-0.39	-0.32
A_72_P236672	LBP	-0.96	1.08	0.06	0.17	-0.07	0.6	-0.03
A_72_P279704	ESRP2	-0.74	1.02	0.63	0.61	0.2	0.26	0.18
A_72_P414168	LOC102537019	-1.99	0	0	-2.24	0	0	1.2
A_72_P313643	ASS1	-0.91	-0.05	0.72	-1.6	-0.25	-0.2	0.08
A_72_P060076	LOC100517891	-1.41	0.67	0.28	-0.99	-0.69	-0.02	-0.21
A_72_P142761	IDO2	-5.39	0.23	2.57	-3.13	-0.66	0.07	0
A_72_P442826	AQN-1	-1.5	0	0.7	-1.14	0	0	0.38
A_72_P146496	XPNPEP2	-3.16	-0.57	1.25	-1.15	-1.66	0.05	-0.28
A_72_P035646	DPEP1	-2.19	-0.27	0.5	-0.85	-1.08	-0.08	0.11
A_72_P330343	SLC1A1	-1.96	-0.15	0.31	-0.99	-0.72	-0.15	0.65
A_72_P411133	NT5E	-0.82	-0.02	0.62	-0.66	-0.32	0.05	1.11
A_72_P140761	LOC100626306	-0.45	-0.02	0.63	-0.72	-0.47	-0.58	0.86
A_72_P443531	LOC100522487	-0.69	0.22	0.61	-0.17	0.04	-0.46	0.65
A_72_P477484	ANKRD34C	0	0	-2.04	-1.25	-2.67	0	0
A_72_P079681	MT1A	-0.44	-1.05	-0.57	-1.52	-1.23	0.17	0.22
A_72_P443520	LOC100738713	-0.01	-0.12	-0.19	-1.06	-1.63	0.11	1.07
A_72_P223362	CYP1A1	1.37	-1.04	-1.28	-0.85	-1.5	0.11	1.5
A_72_P441349	BCL2A1	0.38	-0.97	-0.12	-0.63	-0.68	-0.17	0.64
A_72_P267102	L3MBTL2	-0.68	0.5	0.99	0.43	-10.15	-0.13	-0.04
A_72_P596714	FOS	0.61	0.54	0.67	0.06	-2.72	0.31	-0.21
A_72_P252767	MOBP	0.05	0	0.65	-0.71	0.24	0	-1.15
A_72_P017246	LOC100511354	-0.14	-0.11	0.82	-0.8	0.56	0.03	-1.07
A_72_P232442	LOC396700	0.44	0	2.57	-0.06	0.73	-0.33	-3.02
A_72_P024646	LOC102165634	0.3	0.84	0.69	0	0.19	-0.18	-0.79
A_72_P424889	FABP3	-0.11	0.74	0.75	-0.19	0.35	-0.03	-0.84
A_72_P123721	TCF19	-0.61	0.54	0.69	-0.38	-0.33	-0.14	-0.66
A_72_P312963	PNP	-0.7	0.47	1.13	-0.38	-0.32	-0.07	-0.69
A_72_P282239	LOC100717127	-0.34	0.9	1.33	-1.41	-0.4	0.47	-0.84
A_72_P035766	CHRM1	0.04	0.93	0.82	-0.66	-0.21	-0.18	-0.98
A_72_P201917	TBCCD1	-0.09	0.22	0.78	-0.73	-0.37	-0.08	-0.68
A_72_P232777	SFN	-0.13	0.44	0.87	-0.5	-0.65	-0.12	-1.25
A_72_P442126	RNF39	-0.27	0.45	1.2	0.14	-0.63	-0.08	-0.66
A_72_P365173	MAT1A	0.05	0.71	1.21	0.15	-0.5	0.24	-1.65
A_72_P049916	ADAMTS15	0.22	0.89	1.44	-0.17	-0.29	-0.01	-0.89
A_72_P655357	SRPK3	0.72	0.84	0.31	0.25	-0.21	-0.13	-0.65
A_72_P311328	NRG1	0.65	1.21	0.67	-0.26	-0.22	-0.1	-0.73
A_72_P725998	SHMT2	0.24	0.77	0.29	-0.21	-0.64	0.11	-1.25
A_72_P424559	SLC25A28	0.73	-0.07	0.64	-0.19	-0.02	-0.03	-0.6
A_72_P134271	ACN9	-0.18	0.65	0.48	0.19	-0.99	-0.14	-0.63
A_72_P003696	SNX18	-0.25	0.85	0.13	0.03	-0.95	-0.22	-0.83
A_72_P416333	LOC100736949	-0.25	0.74	0.13	0.37	-0.62	-0.3	-0.69
A_72_P379763	FAM92A1	-0.79	0.1	0.57	0.52	-0.71	0.12	-1.11
A_72_P200842	CC2D2A	0	0	1.22	0	-0.73	-0.41	-2.56
A_72_P760377	LPL	-0.38	0.37	0.71	-0.12	-0.91	-0.17	-2.1
A_72_P225537	ANKRD26	0	0	1.71	0	-2.29	0	-3.72
A_72_P506790	COL17A1	-0.41	-0.27	1.1	-0.22	-0.81	-0.29	-1.2
A_72_P013686	TRPV2	-0.01	0.34	0.63	1	-0.67	-0.36	-3.23
A_72_P495751	NTNG2	0	0	0.98	0.98	0	0	-2.01
A_72_P437294	NASP	0.1	-0.07	0.15	0.79	-0.62	-0.21	-1.24
A_72_P304404	LOC102521409	0.11	0.27	0.22	0.78	-0.63	-0.56	-1.12
A_72_P375448	NDUFAB1	0.62	0.18	0.29	0.79	-0.79	-0.24	-0.79
A_72_P343093	LOC100515663	0.42	-0.13	0.32	0.65	-0.63	-0.27	-0.66
A_72_P221047	LOC102343449	-0.18	0.15	0.95	0.26	-0.9	0	-0.63
A_72_P009561	LOC102163702	-0.28	0.09	0.78	0.15	-0.84	0.01	-0.66
A_72_P079596	TBC1D9B	-0.27	-0.07	0.71	0.19	-0.97	-0.08	-0.92
A_72_P062186	LOC102166034	-0.25	0.01	0.6	0.34	-1.03	-0.09	-0.91
A_72_P381088	E2F3	0.23	0.2	0.68	0.15	-1.17	-0.22	-1.15
A_72_P380988	LOC100515792	0.33	0.11	0.6	0.43	-0.71	-0.03	-0.63
A_72_P221582	LOC100054236	0.04	0.26	0.82	0.43	-1.03	-0.01	-0.92
A_72_P223093	LOC102162635	-0.04	0.71	1	0.85	-1.39	0.02	-1.45
A_72_P383058	LOC102158391	0.03	0.33	0.59	0.55	-0.81	-0.19	-0.69
A_72_P409088	LOC509867	0.02	0.19	0.53	0.96	-0.95	-0.27	-0.91
A_72_P394938	LOC102167756	-0.28	0.26	0.54	0.77	-0.74	-0.29	-0.59
A_72_P434514	LOC102166312	-0.32	0.05	0.52	0.8	-1.01	-0.36	-0.86
A_72_P032236	LOC101866801	-0.3	-0.09	-0.04	0.78	-0.78	0.1	-0.73
A_72_P403488	LOC101047151	-0.18	-0.34	0.25	0.76	-0.91	0.06	-0.72
A_72_P758583	CYP1A2	-0.06	0.01	0.48	0.97	-1.25	0.06	-0.91
A_72_P060066	LOC101442437	-0.43	0.23	0.22	0.82	-1.46	-0.05	-0.71
A_72_P335373	CDR1	0.24	0.66	0.34	0.92	-0.97	-0.48	-0.67
A_72_P241732	RLBP1	0.28	0.58	0.37	0.59	-0.82	0.14	-0.75
A_72_P061646	LOC102158740	0.17	0.32	0.16	0.69	-0.86	-0.01	-0.62
A_72_P416038	TNFRSF1B	0.31	0.62	0.61	0.62	-1.43	-0.21	-0.62
A_72_P515320	LOC100153375	-0.05	0.17	0.94	0.96	-0.92	-0.09	-0.3
A_72_P282614	LOC102158040	0.49	-0.19	1.17	0.3	-1.59	-0.1	-0.75
A_72_P100631	LOC100513899	-0.09	-0.1	0.72	0	-2.43	-0.18	-1.21
A_72_P230962	LOC101420894	0.69	0.59	0.75	0.82	-0.72	-0.28	-0.41
A_72_P088446	HYAL3	0.25	0.81	0.48	0.8	-0.29	-0.11	-0.71
A_72_P217352	MAPK12	-0.08	0.77	1.02	0.63	-0.3	0.17	-0.42
A_72_P403313	LOC780407	-0.46	-0.59	0.26	0.05	-0.75	-0.01	-0.67
A_72_P143241	SCL10A2	-1.61	-0.46	1.17	0	-0.67	-0.05	-1.39
A_72_P109056	CLDN23	-0.94	0.09	0.62	-0.2	-0.01	0.03	-0.6
A_72_P406328	MIS18A	-0.82	-0.01	0.78	-0.79	0.19	0.03	-0.98
A_72_P196912	CENPA	-0.61	-0.02	0.79	-0.48	-0.05	0.21	-0.71
A_72_P081286	PRC1	-0.7	0.08	0.87	-0.29	-0.21	0.1	-1.13
A_72_P039166	LOC100514810	-0.46	-0.5	0.72	-0.72	-0.25	0.05	-0.95
A_72_P223827	LOC780409	-1.08	0.01	1.19	-1.2	-0.9	-0.23	-1.85
A_72_P043281	DEPDC1B	-0.88	-0.3	0.7	-0.65	-0.59	-0.13	-1.23
A_72_P275759	CA4	-1.68	-0.03	1.3	-0.92	-1.35	-0.05	-2.16
A_72_P014171	TACC3	-0.64	-0.2	0.77	-0.26	-0.35	-0.2	-0.88
A_72_P260897	CCNB1	-0.42	-0.21	0.75	-0.8	-0.09	-0.15	-1.26
A_72_P395328	UBE2T	-0.28	0.02	0.77	-0.59	-0.08	-0.23	-1.08
A_72_P329343	CCDC99	-0.44	0.06	1.04	-0.82	-0.21	-0.23	-1.16
A_72_P440521	CCNB2	-0.7	-0.08	0.98	-0.74	-0.12	-0.21	-1.28
A_72_P380218	NUF2	-0.66	-0.32	0.55	-0.61	-0.17	-0.06	-0.96
A_72_P141711	CCNF	-0.83	-0.29	0.88	-0.62	-0.19	-0.08	-1.43
A_72_P284989	KIFC1	-0.57	-0.27	0.97	-0.65	-0.44	0.02	-1.33
A_72_P237617	SPAG5	-0.43	-0.17	0.6	-0.61	-0.29	-0.24	-1.5
A_72_P125316	E2F8	-0.64	-0.13	0.74	-0.66	-0.56	-0.04	-1.7
A_72_P130451	TPX2	-0.19	-0.31	0.79	-0.7	-0.32	-0.14	-1.44
A_72_P198027	PBK	-0.73	0.01	0.58	-0.87	-0.31	0.05	-0.93
A_72_P046151	NDC80	-0.82	-0.19	0.5	-0.83	-0.11	-0.06	-1
A_72_P511849	LOC102426053	-1	-0.16	0.8	-0.72	-0.53	-0.2	-0.6
A_72_P077771	HMGB2	-0.74	-0.35	0.86	-0.78	-0.48	0.11	-0.73
A_72_P095696	FAM117B	-0.55	-0.36	0.95	-1.05	-0.27	-0.25	-0.62
A_72_P320243	CENPE	-0.86	-0.2	0.71	-0.6	0.01	-0.37	-0.61
A_72_P081281	PLK1	-1.08	-0.11	0.51	-0.3	-0.67	-0.35	-1.73
A_72_P486389	ARL14	-2.07	0.35	0.8	-0.64	-1	-0.22	-3.3
A_72_P281844	LOC100621379	-0.95	-0.4	0.45	-0.79	-0.58	-0.02	-2.74
A_72_P112821	LOC100738998	-0.23	-0.01	0.18	-0.73	-0.75	-0.05	-0.93
A_72_P443065	ANXA4	-0.6	0.09	0.06	-0.85	-0.84	0.1	-1.19
A_72_P160196	WAP1	-1.99	-0.15	0.39	-1.5	-1.72	0.29	-2.63
A_72_P441619	LOC396757	-2.22	-0.26	0.53	-1.57	-1.72	0.29	-2.66
A_72_P090031	NEK2	-0.81	-0.14	0.01	-0.43	-0.61	-0.07	-1.09
A_72_P140151	DEPDC1	-0.66	-0.3	0.85	-0.06	-0.05	-0.2	-1.44
A_72_P145091	LOC102161154	-0.6	-0.73	0.98	-0.95	-0.99	-0.16	-1.16
A_72_P164106	CA13	-0.77	-0.38	1.02	-1.37	-1.84	-0.25	-1.17
A_72_P678754	HS3ST5	-0.42	-0.7	0.66	-1.17	-1.01	0	-0.29
A_72_P442208	INSIG1	-0.92	-0.62	-0.87	-0.64	-1.02	0.08	-0.46
A_72_P249042	LOC100621352	-2.35	-0.45	-0.58	-0.78	-1.6	-0.12	-0.49
A_72_P645733	OSR2	-1.85	-0.01	-0.96	-1.03	-0.95	0.33	-0.92
A_72_P245147	LOC102158868	-1.8	-0.26	-0.13	-0.98	-0.54	0.13	-1.03
A_72_P638375	PPP1R3C	-1.88	-0.43	0.31	-1.07	-2.83	0.07	-0.46
A_72_P216482	ANO6	-0.77	0.23	0.38	-0.64	-0.78	-0.02	-0.51
A_72_P759806	SLPI	-1.5	-0.28	0.28	-1.27	-1.77	-0.16	-1.47
A_72_P617837	SLC26A3	-2.53	0.01	0.92	-1.4	-3.92	0.26	-3.08
A_72_P472210	CPO	-3.67	-0.26	0.9	-1.71	-4.81	-0.34	-2.49
A_72_P356703	CPNE8	-1.34	-0.09	0.74	-0.39	-1.19	-0.17	-0.75
A_72_P077546	WAP-3	-3.08	-0.01	-0.06	-0.09	-3.67	0.09	-2.34
A_72_P282474	SPAI-2	-2.99	0.04	-0.02	0.18	-3.63	0.06	-2.21
A_72_P321833	LOC101686596	-0.93	0.03	0.29	0.27	-1.02	0.05	-0.86
A_72_P105991	LOC100737328	-0.72	-0.18	0.32	0	-0.82	-0.01	-0.83
A_72_P136026	LOC102161654	-0.52	0	0.85	-0.16	-1.01	0.29	-0.65
A_72_P534625	ITIH1	-0.6	0.06	0.79	-0.24	-1.39	-0.28	-0.6
A_72_P262542	FLVCR2	-0.97	0.83	0.32	-0.4	-0.66	-0.06	-0.9
A_72_P148026	WBP11	-0.62	0.49	0.03	-0.71	-0.77	0.01	-0.74
A_72_P517861	ITLN2	-0.69	0.49	-0.05	-0.66	-0.84	-0.37	-0.88
A_72_P421864	LOC102167253	-0.82	0.62	0.08	0	-0.94	0.14	-0.46
A_72_P444903	SQLE	-0.19	-0.56	-1.06	-0.69	-0.36	-0.04	-0.94
A_72_P097481	LOC100153642	-0.96	-0.39	-0.89	-0.96	-0.06	0.09	-0.97
A_72_P152306	KLF15	-1.02	-1.18	-0.07	-0.74	-0.24	0	-0.57
A_72_P279119	CASC5	-0.42	-0.78	0.66	-0.72	0.31	0.45	-1.02
A_72_P418209	LOAG_12456	-0.08	-0.83	0.6	0.73	-0.19	-0.24	-0.36
A_72_P077736	PBD-2	-0.76	-1.51	0.74	-0.51	-0.41	-0.13	-0.59
A_72_P408038	LOC100522139	-0.68	-1.13	0.91	-0.23	0	0.01	-0.35
A_72_P137076	ATAD5	-0.33	-3.98	1.28	0.07	-0.04	-0.09	-1.06
A_72_P430119	CD83	0.54	-2.33	0.6	-0.22	-0.77	-0.18	-0.32
A_72_P177441	CCL20	-0.16	-3.44	1.43	-0.16	-1.04	0.09	-0.41
A_72_P303319	PMAIP1	-0.34	-1.16	0.66	-0.07	-0.86	0.1	0.19
A_72_P088291	PDZK1IP1	-0.25	-0.89	1.09	-0.37	-0.79	0.12	-0.43
A_72_P371473	IRS1	-0.03	-0.89	0.77	-0.37	-0.43	0.05	-0.6
A_72_P146551	ADM	0.2	-0.62	1.08	-0.42	-0.41	0.05	-0.68
A_72_P367973	MEIS1	-0.01	-0.59	0.86	0.04	-0.12	0.24	-0.76
A_72_P356133	MEFV	0.19	-1.39	1.3	0.17	0.03	-0.06	-1.58
A_72_P289724	DLGAP5	-0.6	-0.89	0.38	0.25	0.26	-0.19	-0.99
A_72_P291569	LOC100513756	0.01	-1.36	-0.44	-0.1	-1.4	-0.01	-0.7
A_72_P223792	CCR7	0.55	-2.84	-1.55	-0.45	-1.14	-0.14	-0.75
A_72_P061581	LOC100513825	0.21	-0.49	-0.61	0.66	-0.15	0.28	-0.83
A_72_P431954	RBMS2	-0.15	-1.02	-0.62	0.34	-0.07	-0.05	-0.82
A_72_P328478	ITSN1	0.33	-0.86	-0.64	0.35	-0.35	-0.11	-0.73
A_72_P670705	WDR76	0.02	-0.89	0.03	0.59	0	-0.2	-0.83
A_72_P203077	GMPR	0.54	-0.66	0.06	-0.05	-0.07	0.71	-1.12
A_72_P599488	FILIP1L	0.4	-0.53	-0.25	-0.3	-0.76	0.74	-1.19
A_72_P359743	PINK1	0.67	-0.73	0.38	0.14	-0.91	0.07	-1.22
A_72_P229937	LOC102160753	0.5	-0.82	0.12	0.04	-0.82	0.2	-0.93
A_72_P245807	OLR1	0.28	-0.63	-0.03	-0.17	-0.68	0.2	-1.08
A_72_P440621	IL29	1.27	-1.34	0.52	-0.67	-1.19	0.27	-2.82
A_72_P008316	TSPAN1	-0.04	-0.39	0.62	0	-0.89	-0.1	-1.37
A_72_P047886	CDHR4	-0.01	-1.14	0.56	0.06	-1.67	0.02	-2.66
A_72_P345118	ZBP1	0	-0.59	0.33	0.34	-0.59	0.13	-0.77
A_72_P276754	SLC2A6	0.33	-0.88	-0.25	-0.59	-0.3	0.07	-0.67
A_72_P357958	LOC102181372	0.39	-1.49	0.18	-1.38	-0.66	-0.06	-1.37
A_72_P152631	TRIM14	0.29	-0.44	0.66	-0.85	-0.62	-0.13	-0.82
A_72_P509123	IFIT2	0.48	-1.17	0.81	-1.18	-1.31	-0.02	-1.18
A_72_P496286	DDX58	0.25	-0.89	0.48	-0.84	-0.68	-0.14	-1.06
A_72_P223277	APON	0.28	-0.52	0.06	-0.81	-1	0	-0.93
A_72_P255137	PARP11	0.43	-1.78	0.79	-0.55	-0.35	-0.22	-1.3
A_72_P177406	MX2	1.5	-1.34	0.09	-0.14	-1.13	-0.11	-0.98
A_72_P303019	IRG6	1.1	-1.93	0.21	-0.01	-0.9	0.15	-0.83
A_72_P147026	CCRL1	1.34	-0.44	0.06	-0.92	-0.18	-0.08	-1.23
A_72_P410733	BTC	0.78	-0.71	0	0	0	0.06	-0.88
A_72_P105101	APOL3	1.31	-1.04	0.42	-0.44	-0.14	-0.19	-2.05
A_72_P062411	TMEM72	0.24	-0.14	-0.32	-0.61	-0.79	-0.17	-1.04
A_72_P308748	RYR2	0.13	0.05	-0.34	-1.32	-1.54	-0.02	-1.29
A_72_P429924	PLEKHA4	0.7	-0.35	-0.61	-0.16	-0.23	-0.05	-1.49
A_72_P172311	IFITM1	0.7	-0.51	-1.43	-0.56	-0.19	0.07	-1.92
A_72_P191026	HERC5	0.57	-0.96	-1.08	-0.42	-0.32	-0.13	-1.41
A_72_P442072	CXCL11	0.48	-0.77	-0.45	-1.32	0.01	-0.12	-1.91
A_72_P127626	ACSL1	0.7	0.4	-0.79	-0.33	0.07	0.28	-1.33
A_72_P168456	C6orf27	0	1.74	-0.69	-3.08	0	0.23	0
A_72_P774674	BRP44	-0.01	0.51	-0.82	-2.48	0.46	0.65	-0.11
A_72_P472231	LOC100519628	0	0	0	-2.63	-1.46	0	-1.31
A_72_P288339	LOC100519396	0.07	0	0	-3.42	-0.68	0.23	-0.81
A_72_P012681	FAM221B	-0.25	-0.04	0	-4.17	-1.72	0	-1.06
A_72_P202407	LOC101909020	0	-0.03	-0.86	-1.86	0	0.18	-0.68
A_72_P232157	KLB	-0.67	0.16	-0.74	-2.21	-0.21	-0.14	-0.92
A_72_P501484	ZNF462	0	-0.54	-0.87	-2.26	-0.75	0.02	-1.37
A_72_P492675	NEDD4	0	-1.04	-0.27	-2.63	0	0	-1.57
A_72_P443784	IL17F	-0.59	-0.08	0.6	-3.81	0.67	0	0.13
A_72_P726688	ATP1A2	-0.48	0	0	-2.04	0.61	-0.09	-0.74
A_72_P081226	UHRF1BP1	0.79	0.64	0.47	-1.95	-0.04	0.19	0.04
A_72_P108996	MFSD12	0.63	0.51	0.68	-1.85	0.34	0.3	-0.07
A_72_P078101	CACNG1	0.63	0.29	0.26	-1.58	0.35	1.18	0.07
A_72_P080006	CHRD	0.61	-0.25	0.79	-1.41	-0.26	0.63	-0.9
A_72_P016186	LOC100287042	-0.17	0.59	-0.64	0	0	-0.12	-0.85
A_72_P232552	HN1L	-0.62	0.61	-0.65	0.7	-0.17	-0.36	-0.69
A_72_P262522	LOC100737167	0.65	-0.24	-0.75	0.96	-0.3	0.08	-0.46
A_72_P428559	LOC100513397	0.27	-0.46	-1.1	0.7	-0.46	0.12	-1.01
A_72_P410968	BVES	0.5	-0.33	-1.39	1.05	-0.92	-0.15	-1.35
A_72_P312023	LOC102164703	0.38	-0.15	-1.35	0.71	-0.56	0.25	-0.85
A_72_P421269	FAM198B	0.3	-0.15	-1.17	0.54	-0.61	0.01	-0.66
A_72_P288919	LOC102156729	0.42	-0.26	-1.06	0.67	-0.36	-0.06	-0.73
A_72_P209647	LOC102159535	0.8	-0.22	-1.68	1.02	-1.15	-0.08	-0.39
A_72_P020406	DNAJC13	0.88	-0.6	-0.99	0.49	-0.69	0.04	-0.53
A_72_P304669	LOC101907860	0	0.32	-1.44	0.59	0	0.18	-1.79
A_72_P463353	NPW	0.27	0.3	-1.14	0.61	0.59	-0.22	-1.62
A_72_P452702	FAM124A	0.59	0.14	-1.52	0.68	0.24	-0.24	-2.31
A_72_P420599	TSC22D1	0	-0.22	-0.77	0.8	0	0.08	-0.89
A_72_P390553	LOC102178623	0	0.09	-0.95	1.02	0	0	-1.02
A_72_P320318	LOC100994763	0	0.34	-1.08	0.68	-0.12	-0.11	-0.84
A_72_P222547	GCC2	0	-0.38	-1.89	0.87	0	-0.05	-0.7
A_72_P212617	RBMX2	-0.07	-0.04	-1.2	0.67	-0.08	-0.44	-0.64
A_72_P178356	LOC102165113	-0.08	-0.2	-1.33	0.61	-0.31	-0.25	-0.66
A_72_P405973	TRAK2	-0.5	-0.01	-1.18	0.81	0	-0.28	-0.66
A_72_P706541	NEFM	-0.5	0.12	-1.96	0.63	0	-0.42	-0.6
A_72_P124881	PRKCE	-0.02	-0.71	-1.53	0.43	0.08	0.07	-0.87
A_72_P247077	RG9MTD2	0.29	0.42	-1.03	0.28	-0.4	-0.59	-0.82
A_72_P773907	NUBPL	0.1	0.67	-0.83	0.18	-0.39	-0.86	-0.93
A_72_P269809	LOC102162142	0.2	0.7	-0.91	0.14	-0.41	-0.57	-0.76
A_72_P320543	LOC102164214	0.63	0.45	-1.13	0.14	-0.18	-0.91	-0.71
A_72_P705648	LOC101028399	0.74	0.27	-1.7	-0.12	-0.12	-0.67	-0.67
A_72_P038666	C9H11orf52	0.9	0.37	-1.08	0.34	-0.05	-0.24	-0.6
A_72_P100626	LOC102164845	0.42	0.17	-1.28	0.75	-0.13	-0.8	-0.71
A_72_P036686	SYNJ2BP	0.24	0.08	-1.48	0.55	-0.26	-0.88	-1
A_72_P217942	ZNF548	0.18	-0.03	-1.24	0.76	-0.24	-0.56	-0.72
A_72_P250842	LOC102165942	0.3	-0.04	-1.6	0.69	-0.13	-0.7	-0.9
A_72_P004726	LOC100514687	0.57	0.27	-0.91	0.62	0.13	-0.66	-0.61
A_72_P167791	CYSLTR2	0.41	0.23	-0.96	0.06	-0.67	-0.28	-1.48
A_72_P210067	CHEK2	-0.58	-0.08	-1.46	0.16	-0.66	0.16	-1.06
A_72_P223177	FASN	0.85	0.09	-0.14	-0.24	-0.77	0.08	-0.91
A_72_P132121	LOC101679480	0.65	0.32	-0.18	0.23	-1	0.11	-0.8
A_72_P176131	HSP70	0.66	0.21	-0.26	-0.05	-1.02	0	-0.89
A_72_P036976	GSTCD	0.56	0.64	-0.58	0.43	-0.95	0.29	-1.1
A_72_P381578	TMEM258	0.04	0.71	-0.51	0.86	-0.64	-0.2	-0.7
A_72_P151421	SYCE2	0.16	0.42	-0.41	0.8	-0.68	-0.42	-0.64
A_72_P060551	RBM14	0.01	0.29	-0.17	0.64	-0.72	-0.25	-0.71
A_72_P393038	LOC100738209	0.29	0.29	-0.78	0.94	-0.48	-0.46	-0.65
A_72_P384678	LOC101176743	0.48	0.63	-0.09	0.72	-0.66	-0.11	-0.34
A_72_P359438	LOC100688592	0.05	-0.03	-0.72	0.41	-0.82	-0.13	-0.7
A_72_P134076	CCDC125	-0.03	0.36	-0.65	0.38	-0.76	-0.17	-0.64
A_72_P420614	ADIPOQ	-0.01	0.28	-0.65	0.51	-0.69	-0.03	-0.92
A_72_P227547	CHKA	-0.33	0.04	-0.08	0.67	-1.87	-0.08	-1.49
A_72_P382213	LOC102166899	0.03	0.05	-0.25	0.65	-0.92	0.03	-0.96
A_72_P340293	KIAA1586	0.01	0.13	-0.34	0.7	-1.32	-0.04	-0.94
A_72_P706687	LOC100154586	0	0	-0.72	0	-1.59	0	-1.4
A_72_P325973	DMP1	0.33	-0.12	-0.79	0.48	-1.81	-0.02	-1.77
A_72_P405668	TM4SF1	0.17	-0.49	-0.97	0.22	-1.09	-0.21	-0.88
A_72_P092026	LOC100519237	-0.21	-0.21	-0.53	0.92	-0.71	-0.17	-0.69
A_72_P070991	ATP2C2	-0.33	0.01	-0.67	0.82	-0.61	-0.32	-0.87
A_72_P064636	LOC100152150	-0.29	0.1	-1.02	0.62	-0.84	-0.04	-0.41
A_72_P208122	LOC102165698	0.27	-0.17	-0.13	1.05	-1.02	0.27	-0.76
A_72_P047076	LOC102163081	0.29	-0.26	-0.25	0.77	-2.06	0.15	-0.6
A_72_P088236	HSP70.2	0.69	0.77	-0.08	0.19	-1	0.11	0.28
A_72_P403338	EREG	1.09	-0.5	0	0.8	-0.96	0	-0.25
A_72_P399643	CCDC77	1.81	0.42	-0.36	0.72	-0.99	-0.28	-0.17
A_72_P251562	SLC25A37	0.44	0.9	-0.43	0.94	0.18	-0.06	-0.6
A_72_P475480	FAM19A3	1.04	1.53	-0.3	1.18	0.2	0	-0.26
A_72_P108096	LOC100157320	0.91	0.91	0.08	1.05	-0.03	0.43	0.05
A_72_P184501	FAM83E	1.73	0.67	0.25	0.63	-0.02	-0.39	0.39
A_72_P384193	GRK4	1.14	0.89	-0.04	0.79	-0.33	-0.62	-0.03
A_72_P032746	NAT6	0.78	1.16	0.47	0.87	-0.12	-0.34	0.02
A_72_P512152	LIPM	0.38	0.75	0.47	0.84	-0.15	-0.67	-0.06
A_72_P305579	MLC1	0.78	0.36	-0.23	-0.25	0.64	0.21	-0.77
A_72_P318313	WFS1	0.92	0.76	-0.47	0.18	0.22	-0.07	-1.05
A_72_P013741	PYCR1	0.59	0.71	0.04	-0.15	0.11	0.12	-0.64
A_72_P706463	ITIH4	1.13	1.66	-0.43	0.05	0.69	-0.04	-0.71
A_72_P444235	LOC100621502	3.24	0	0	1.19	0.51	0	-2.2
A_72_P387418	Khdc3	0.74	-0.11	-0.13	-0.15	0.2	0.62	-0.63
A_72_P159746	LOC100737768	2.27	0.16	-0.74	-0.76	0.35	-0.01	-0.18
A_72_P263042	ATP2A1	1.13	0.54	-0.88	-0.6	-0.2	0.06	-0.23
A_72_P201647	LOC100738858	1.16	-0.14	-0.31	-0.32	-0.59	-0.25	-0.71
A_72_P443924	PPP2R5B	-0.14	0.85	-0.2	0.66	-0.79	-0.27	0.77
A_72_P035661	GATA4	-0.12	0.31	-0.59	1.07	-0.83	-0.31	0.49
A_72_P390753	LOC101928433	0.48	-0.03	0.02	0.98	-1.11	-1.07	0.37
A_72_P478123	CEBPE	-0.25	-0.77	-0.59	0.78	-1.06	-1.24	0.95
A_72_P246352	TLK2	0.26	-0.64	-0.88	0.74	-0.08	0.02	-0.05
A_72_P188801	CHD8	0.62	-0.6	-0.59	0.8	-0.02	-0.09	0.07
A_72_P349058	PELI1	0.66	-0.78	-0.05	0.84	0.05	-0.13	0.06
A_72_P061496	TNRC18	0.25	-0.64	0.1	0.79	-0.37	-0.16	0.69
A_72_P181741	LOC100625479	0.72	-1.3	-0.46	0.56	-0.79	0.07	0.73
A_72_P430294	CABYR	-0.06	-0.65	-0.86	0.78	-0.69	-0.01	-0.14
A_72_P034506	ZSCAN22	-0.93	-0.13	-1.32	3.86	0.05	-0.75	0.46
A_72_P319468	TMEM41B	0.17	-0.19	-0.78	2.78	0.65	-0.16	0.43
A_72_P362093	LOC102166068	-0.15	0	-0.65	1.5	0.68	0	0.65
A_72_P410983	CD52	0.02	-0.23	0.34	-0.47	0.86	-3.15	1.01
A_72_P061571	SRP72	0.05	0.65	0.7	-0.11	0.13	-2.93	0.57
A_72_P537712	PPT2	-0.59	0.77	0.17	0.53	-0.04	-3.75	0.26
A_72_P576904	MARCH6	0.26	0.6	-0.06	-0.04	0.25	-1.07	0.8
A_72_P362763	LOC102162739	0	-0.01	-0.69	0.38	0.41	-1.85	-0.87
A_72_P441260	ANG4	0.33	0.77	0.9	0	1.07	0	-0.67
A_72_P709130	TGM1	0.64	0.24	0.62	0.15	0.61	-0.05	-0.24
A_72_P171626	KANK4	0.59	0.15	0.8	0.08	1.08	-0.11	-0.7
A_72_P327653	LOC781674	0	0.83	1.58	-0.22	1.36	0	0.11
A_72_P129896	LOC100737080	0.25	0.69	0.8	-0.58	1.11	-0.21	-0.05
A_72_P088731	ITIH2	0.03	0.75	0.11	-0.65	1.11	0.55	-0.24
A_72_P225932	SFTPA1	0.99	0.23	0.31	-0.83	0.87	0.24	-0.29
A_72_P088071	CLPS	0.77	0.54	0.39	-0.64	0.6	0.36	0
A_72_P137861	S100A9	1.23	-0.09	-0.04	-0.69	1.44	0.05	0.34
A_72_P588696	POAT1-1	0.82	-0.04	0	-0.22	1.1	-0.05	0.63
A_72_P070111	TNNC2	1.72	0.61	-0.21	-0.66	2.2	0.61	0.6
A_72_P186336	LOC396643	0.94	0.77	-0.09	-0.27	1.23	0.25	0.41
A_72_P327078	SH3BGRL2	0.65	0.24	0.54	-0.69	1.15	0.5	0.46
A_72_P587906	PLA2G3	0.6	0.25	0.62	-1.04	2.57	0.5	0.19
A_72_P251482	GOLGA7B	0.73	0	0.68	-0.62	1.57	0.09	-0.02
A_72_P315363	LOC100737457	1.05	1.23	0.19	-0.4	1.38	0.96	0.55
A_72_P035871	NPG4	0.29	0.84	-0.04	-0.68	1.43	-0.48	0.1
A_72_P308648	MSN	0.27	-1.16	0.66	0.17	4.35	-0.43	0.64
A_72_P291089	TANGO6	0.97	-0.6	0.28	0.06	2.08	0.24	0.25
A_72_P253287	LOC100623698	0.77	-0.04	1.01	0.13	2.92	0.49	-0.05
A_72_P039086	SDS	1.03	-1.03	1.03	0.1	1.26	0.03	0.14
A_72_P275444	F13A1	0.61	-1	0.31	0.17	0.74	-0.12	0.13
A_72_P176971	TNFRSF4	0.14	-0.95	-0.19	0.54	1.33	-0.31	0.59
A_72_P257487	LONRF3	0.44	-0.92	0.07	0.95	0.85	0.05	0.5
A_72_P153356	SLC22A5	0.66	-0.59	-0.83	0.51	1.06	-0.36	0.32
A_72_P487513	LGI3	0.92	-0.22	-0.66	0.42	0.86	-0.48	0.58
A_72_P037791	SLC10A7	0.98	-0.31	-0.63	0.52	0.76	0.26	0.31
A_72_P474394	APOA2	1.03	0.07	-0.7	0.6	1.13	0.17	0.62
A_72_P259402	REG3G	1.38	-0.75	0.1	0.65	1.28	-0.15	0.55
A_72_P044426	DTNA	1.39	0	0	0.6	1	-0.14	0.16
A_72_P203472	SOCS2	0.33	-0.17	-0.61	0.06	0.9	-0.42	0.79
A_72_P412488	SSBP2	0.59	-0.09	0.19	-0.4	0.73	-0.16	0.71
A_72_P034306	SOX18	0.61	0.05	0.23	-0.32	0.68	-0.22	0.7
A_72_P146406	UCP3	1.46	-0.56	-0.44	-0.19	1.11	-0.19	2.07
A_72_P165791	F12	0.75	-0.32	0	0.37	0.65	0.01	1.26
A_72_P173996	LOXL1	0.66	0.1	0.18	-0.2	0.84	0.42	1.34
A_72_P396648	LOC100624532	0.98	0.3	0.43	0.22	0.8	0.83	0.35
A_72_P057356	FST	0.92	-0.15	0.44	0.2	0.88	0.72	0.44
A_72_P375943	LOC100518088	0.67	0.01	0.09	0.46	0.55	1.08	0.8
A_72_P300629	PLEC	1.34	-0.3	-0.05	-0.09	0.79	0.6	0.46
A_72_P285654	DDN	1.55	-0.27	-0.43	-0.13	0.43	0.74	0.66
A_72_P554501	ATP8B4	1.39	-1.21	0.39	-0.27	0.29	1.09	0.79
A_72_P637186	PCK1	-0.88	1.1	0.03	0.1	0.15	0.03	0.87
A_72_P290279	IL34	-0.74	0.67	-0.04	-0.34	0.16	0.1	0.66
A_72_P488954	TANGO2	-0.81	0.64	0.52	0.37	0.32	-0.29	0.71
A_72_P440076	G6PC	-0.62	1.18	0.42	0.63	0.44	-0.29	2.03
A_72_P437484	SLC2A5	-0.64	1.14	0.02	0.93	0.43	-0.51	0.82
A_72_P511080	P2RY2	-0.67	1.21	-0.03	0.72	0.11	-0.28	0.13
A_72_P008121	MTMR8	0.37	0.62	0.16	-0.02	1.14	0.12	0.63
A_72_P165056	ABHD5	0.3	0.94	0.26	-0.3	0.91	0.22	0.97
A_72_P034386	AGT	-0.35	1	0.14	0.04	0.69	0.02	1.12
A_72_P485061	SLC22A13	-0.03	0.91	0.27	0.51	0.67	0.11	1.09
A_72_P105566	SPSB2	-0.27	0.96	0.26	0.51	0.88	0.06	0.78
A_72_P042251	CHIA	-0.21	0.6	0.27	0.28	0.92	0	0.79
A_72_P237292	SLA-6	0	0.68	0.34	0.01	0.71	-0.27	0.77
A_72_P132831	INPP1	0.02	0.63	0.48	0.07	1	0.03	1.05
A_72_P473932	TRPA1	0.07	0.46	0.17	0.71	0.59	-0.17	0.75
A_72_P394128	NRXN1	0	0	0	0.64	1.18	0	1.37
A_72_P040711	FAM213B	1.2	0.33	-0.04	0.44	1.08	-0.07	1.63
A_72_P510070	ZBBX	0.69	0.8	-0.33	-0.01	1.14	0.06	2.11
A_72_P352623	HOMER2	1.21	0.56	-0.72	0.41	1.46	0.12	2.43
A_72_P303029	APOM	0.81	0.8	-0.36	0.44	0.78	-0.25	2.91
A_72_P444654	TRPV6	1.05	1.36	-0.48	0.08	1.59	-0.12	0.99
A_72_P210252	TRNP1	1.09	0.98	-0.21	0.24	1.26	-0.23	0.86
A_72_P213597	HEBP1	0.51	0.96	-0.31	0.13	0.76	-0.1	0.77
A_72_P043231	ACADSB	0.44	0.65	-0.19	0.04	0.59	-0.06	0.76
A_72_P021311	BBOX1	0.54	0.64	-0.32	-0.09	0.85	-0.05	0.75
A_72_P185186	SCARB1	1	0.73	-0.19	0.18	1.14	0.13	1.27
A_72_P132996	LOC102142585	0.82	0.45	-0.07	0.02	0.92	-0.04	0.64
A_72_P252597	RNF207	1.15	0.73	-0.2	-0.14	0.68	0.01	0.69
A_72_P440081	PHYH	0.88	0.51	-0.45	-0.14	0.74	-0.27	0.9
A_72_P156241	DHRS4	1.04	0.61	-0.57	-0.07	0.75	0.06	0.86
A_72_P489960	TLL2	1.58	0.8	-0.27	0.57	0.99	-0.13	0.64
A_72_P414018	SCT	2.5	0.7	-0.9	0.89	1.88	-0.06	1.23
A_72_P290894	SLC46A1	1.79	1.1	-0.83	0.83	1.54	-0.06	1.39
A_72_P146521	FOLH1	1.96	1.24	-1.15	0.74	2.47	-0.08	2.05
A_72_P029381	TMEM169	0.81	0.13	-0.16	0.55	0.77	0	0.78
A_72_P118156	LOC100623407	1.18	0.59	0	0.62	1.23	0.13	1.03
A_72_P077586	SLC11A1	0.59	0.64	-0.25	0.33	0.79	0.06	0.32
A_72_P489417	CDH23	0.66	0.38	0.17	0.5	0.85	0.39	0.86
A_72_P203887	SLC2A8	0.85	1.07	-0.13	0.97	1.53	0.09	1.36
A_72_P440396	PDX1	0.89	1.45	0.05	1.49	1.71	-0.07	1.92
A_72_P215057	FAM171A2	0.5	0.62	0.15	0.6	0.38	0.07	1.02
A_72_P428929	KLF10	0.54	0.78	0.51	0.67	0.78	-0.11	0.94
A_72_P303264	MMP9	0.55	0.71	0.61	0.26	0.74	0	1.25
A_72_P356843	FAM189B	0.73	0.97	0.23	0.38	0.83	0.13	1.14
A_72_P404633	LOC102166835	0.74	0.99	-0.17	0.19	0.39	-0.29	1.05
A_72_P487576	ADAM28	0.61	0.73	0.02	-0.06	0.45	-0.09	0.89
A_72_P714188	TLDC1	0.7	0.85	-0.1	0.42	0.54	-0.11	1.43
A_72_P288804	DGAT2	0.69	1.57	-0.32	0.72	0.84	-0.21	1.58
A_72_P365643	LOC100517736	0.83	0.91	-0.22	0.61	0.52	-0.16	0.55
A_72_P265997	CDRT1	0.68	0.79	-0.07	0.7	0.62	-0.25	0.62
A_72_P153441	FAIM2	0.84	0.56	0.51	0.4	1.19	0	0.7
A_72_P392563	ASPHD2	1.04	0.16	0.31	0.3	0.61	-0.15	0.8
A_72_P138971	WSCD1	0.78	-0.02	-0.12	0.22	0.73	-0.05	0.74
A_72_P489307	TET1	0.77	-0.12	0	0.09	1.02	-0.22	0.8
A_72_P426649	CHODL	0.59	0	0	0.21	1.55	0.26	0.88
A_72_P185286	MLN	1.44	0	0	0.67	2.39	0	2.09
A_72_P165021	GHRL	0.84	0.15	-0.08	0.39	1.57	0.08	1.01
A_72_P306353	FGD1	1.25	0.62	-0.34	0.04	0.51	0.36	0.64
A_72_P527747	NLRC5	0.93	0.83	-0.17	0.71	0.66	0.28	0.27
A_72_P146801	EPHX1	1.19	1.13	-1.84	0.42	0.83	-0.11	0.21
A_72_P417082	CDK20	0.84	0.7	-1.07	0.04	0.65	0.05	0.12
A_72_P557020	SEC14L2	0.75	0.87	-0.9	0.03	0.28	0.06	0.11
A_72_P036791	SLC25A23	1	0.64	-0.75	0.31	0.09	0.05	0.4
A_72_P414073	LOC100154127	0.96	0.77	-0.78	0.21	0.01	-0.22	0.43
A_72_P707098	DNAH1	0.72	0.99	-0.97	0.31	-0.14	-0.23	0.58
A_72_P173056	LOC100738495	1.16	1.1	-0.89	0.27	0.68	0.08	0.57
A_72_P362883	CA11	1.38	1.08	-0.59	0.32	0.52	0.05	0.62
A_72_P030056	RHOV	1	1.04	-0.61	0.44	0.3	0.06	0.76
A_72_P276119	ETNK2	0.59	0.76	-0.37	0.31	0.13	0.14	0.64
A_72_P632481	CAT	0.94	0.65	-0.4	0.2	0.31	-0.04	0.96
A_72_P754203	SELENBP1	0.86	0.61	-0.92	0.24	0.52	0.2	0.71
A_72_P549961	RAB3A	0.91	0.36	-1.3	0.28	0.47	0.02	0.65
A_72_P152416	BCMO1	1.7	0.97	-1.99	1.21	0.44	-0.26	1.47
A_72_P489916	TCTN3	0.59	0.62	-0.32	0.45	0.6	0.07	0.5
A_72_P150321	GLS2	1	0.79	-0.54	0.57	0.8	0.18	0.58
A_72_P440651	LOC733635	3.28	2.56	-2.77	2.51	2.59	-0.14	1.35
A_72_P077461	AKR1C1	3.78	3.16	-2.53	2.73	2.6	0.07	1.59
A_72_P536730	NQO1	1.45	1.21	-1.65	1.19	1.28	0.1	1.13
A_72_P146631	CBR1	0.6	0.76	-0.63	0.79	1	-0.39	0.5
A_72_P108316	GCLC	0.63	1.34	-1.22	0.82	1.1	0.25	0.33
A_72_P252912	ONECUT2	0.47	1.86	-1.4	0.75	0.7	-0.19	0.58
A_72_P706948	LOC102164268	0.69	1.36	-0.76	0.48	0.51	-0.06	0.69
A_72_P502451	PTGR1	0.82	1.18	-0.36	0.1	0.82	-0.06	0.29
A_72_P707431	MKKS	0.28	0.61	-0.82	-0.13	0.28	-0.05	0.61
A_72_P035546	ICA	0.11	0.69	-0.87	-0.25	0.46	-0.25	0.72
A_72_P287099	RAB3D	0.16	0.9	-0.59	-0.23	0.29	0.09	0.75
A_72_P143716	EPHX2	0.41	0.41	-0.97	0.08	0.62	-0.29	1.45
A_72_P012826	LOC102167554	0.74	0.59	-1.79	0.8	0.64	-0.16	2.13
A_72_P185176	CYP2B22	1.13	0.79	-1.68	0.32	0.62	0.21	1.92
A_72_P619535	PGRMC2	0.6	0.56	-0.6	0.14	0.74	-0.18	1.05
A_72_P780364	NIPSNAP1	0.55	0.66	-0.55	0.13	0.61	-0.18	1
A_72_P383518	WNT9A	0.57	0.9	-1.01	0.07	0.87	0.06	1.33
A_72_P569989	GHR	0.42	1	-0.84	0.13	0.32	-0.12	0.86
A_72_P336168	DIO1	0.45	1.63	-1.45	0.28	0.85	0.03	1.4
A_72_P230527	FBXL16	0.29	0.98	-1.31	0.5	0.6	0.14	1.39
A_72_P048526	UGDH	0.63	0.9	-1.34	0.68	0.61	-0.14	1.03
A_72_P354778	AKR1CL1	0.94	1.27	-1.53	0.67	1.13	-0.11	1.02
A_72_P732133	NT5DC1	-0.07	0.65	-0.24	0.29	0.64	-0.28	0.66
A_72_P576424	PDK4	0.15	0.74	-0.23	0.12	0.73	-0.06	0.9
A_72_P259137	LOC100626847	0.06	0.89	-0.26	0.41	0.68	-0.22	1.21
A_72_P340818	LOC100517307	0.25	0.78	-0.52	-0.29	0.59	-0.29	1.44
A_72_P136621	CYP27A1	0.01	0.73	-0.71	0.08	0.95	-0.24	2.17
A_72_P283139	CA12	-0.37	0.74	-0.87	-0.24	0.9	-0.14	1.62
A_72_P477352	CYP39A1	0.05	0.68	-1	0.64	0.97	-0.38	1.76
A_72_P685122	SLC16A1	0.02	1	-1.58	-0.13	0.95	0.09	0.69
A_72_P774158	LOC102521185	0.79	0.86	-2.31	0.15	1.5	-0.14	1.1
A_72_P215717	TMEM65	0.16	0.68	-2.37	0.22	1	-0.01	0.86
A_72_P705022	ACAA2	0.52	0.62	-2.82	-0.1	0.7	-0.12	0.73
A_72_P023066	ZFYVE28	0.59	0.64	-0.68	-0.2	0.44	-0.42	0.26
A_72_P135981	HSPA1L	0.17	0.95	-0.54	-0.89	0.7	0.06	1.15
A_72_P400753	LOX	-0.71	0.22	-1.44	-0.57	3.89	-0.2	0.45
A_72_P444320	CLDN5	-1.15	0	-0.72	-0.12	1.59	-0.2	0.43
A_72_P208097	DARC	-0.76	0	0.21	0.11	1.88	0.06	0.87
A_72_P672707	KLF9	-0.82	0.02	-0.09	-0.29	0.61	-0.09	0.81
A_72_P285359	DUSP7	0.15	-0.03	-0.66	0.72	-0.46	0.77	0.21
A_72_P050406	NCDN	0.83	0.06	-0.78	0	0.16	0.29	1.02
A_72_P365723	LOC100525600	0.21	-0.04	-1.04	-0.1	-0.26	0.62	1.06
A_72_P254842	DUSP8	1.08	0.04	-0.87	0.06	-0.64	0.2	0.38
A_72_P295679	EEF1A2	1.61	-0.96	-1.36	-0.35	1.24	0	0.63
A_72_P293189	CNN2	0.46	-1.08	-1.31	-0.64	0.44	-0.13	0.46
A_72_P288419	PPP1R13L	0.98	-0.64	-0.89	0.15	0.56	-0.84	0.11
A_72_P233422	Tor1aip1	0.66	0.04	-0.92	0.49	0.43	0.76	-0.03
A_72_P158136	KIF3A	1.01	-0.03	-0.82	0.3	0.14	0.98	-0.05
A_72_P012811	OSBP2	0.05	-0.21	-1.18	0.61	0.38	0.77	0.28
A_72_P109441	TDO	0.14	0.02	-0.58	0.7	0.64	0.94	0.15
A_72_P126526	SGCA	0.38	-0.33	-0.83	0.57	0.64	0.82	-0.18
A_72_P477895	NKX2-8	0.37	-0.07	-0.98	0.01	0.93	0.84	0.16
A_72_P444679	TBX21	0.69	-0.26	-0.67	0.09	0.75	0.42	0.28
A_72_P583076	CA3	0.6	-0.52	-0.87	0.2	0.53	0.75	0.26
A_72_P266377	SURF4	0.62	-0.14	-0.92	0.64	0.25	-0.1	0.49
A_72_P068746	SLC18A2	0.47	-0.04	-1.6	0.38	0.61	0.38	0.63
A_72_P256402	LOC100624199	0.48	-0.35	-1.51	0.17	0.62	0.61	-0.13
A_72_P391818	RN7SK	0.12	-0.39	-2.81	0.6	0.97	0.33	0.01
A_72_P083021	PTK7	0.35	-0.4	-2.11	0.59	0.74	-0.28	0.14
A_72_P326353	FOXO4	0.67	-0.36	-2.13	0.48	0.68	0.19	-0.15
A_72_P429584	IQSEC2	0.59	-0.18	-1.53	0.27	0.63	0.23	0.23
A_72_P175896	HTR3A	0.64	-0.36	-1.96	0.35	0.75	0.09	0.15
A_72_P218312	SOCS1	0.7	-0.26	-1.3	0.09	0.67	0.27	0.24
A_72_P051201	NKAIN2	0.99	-0.05	-1.42	0.48	0.6	0.19	0.17
A_72_P186406	SIM1	0.95	-0.29	-1.08	0.46	0.71	0.19	0.4
A_72_P264607	MGAT3	0.97	-0.17	-0.96	0.5	0.64	-0.03	0.28
A_72_P086091	NFATC4	0.93	-0.19	-1.34	0.66	0.75	-0.18	0.27
A_72_P243002	CCER1	0.98	-0.35	-1.47	0.36	0.74	-0.1	0.33
A_72_P380198	RC3H1	0.76	-0.06	-0.87	0.16	0.65	0.01	-0.02
A_72_P066846	SSX2IP	0.53	0.24	-1.16	0.61	0.63	0.18	0.26
A_72_P098541	LOC100519689	0.83	-0.32	-1.32	0.65	0.25	-0.09	-0.07
A_72_P202007	LOC100155807	0.65	-0.17	-1.72	0.83	0.09	-0.29	0.1
A_72_P442949	TAF4B///IMPACT	1.06	-0.21	-0.63	1.01	0.11	0.15	-0.02
A_72_P429854	HPCA	0.62	-0.02	-0.78	0.95	0.59	0.34	0.16
A_72_P003296	LOC100736576	0	-0.51	-1.62	0.14	1.21	0.48	-0.69
A_72_P264492	IDNK	0.29	-0.04	-0.77	-0.1	0.67	-0.26	-0.64
A_72_P298334	LOC100520367	0.81	-0.06	-1.13	-0.12	0.28	-0.02	-0.91
A_72_P075086	LOC102159834	0.63	-0.59	-0.71	0.15	0.65	-0.21	-0.59
A_72_P177466	DES	0.99	-0.68	-1.01	-0.03	0.32	0.03	-0.56
A_72_P133586	RND2	0.61	-0.38	-1.15	0.41	0.38	0.28	-0.84
A_72_P703899	LOC102163335	0.61	-0.46	-1.49	0.26	0.74	0.32	-0.74
A_72_P316713	Pfn2	0.05	0.04	-1.04	0.6	0.84	-0.07	-0.46
A_72_P214992	MYLK2	0.28	0.46	-1.66	0.62	0.61	-0.09	-0.63
A_72_P346473	LOC102166642	0.65	-0.67	-1.96	-0.39	-0.05	-0.09	-0.31
A_72_P279224	C8H9orf91	0.65	-1.06	-1.72	-0.27	-0.45	0.23	-0.78
A_72_P686083	SCAMP3	0.74	-0.09	-1.19	-0.44	0.02	0.23	-0.61
A_72_P431984	MBNL1	1.1	-0.22	-1.4	-0.79	0.26	0.11	-0.31
A_72_P077231	LOC101695119	1.24	0.33	-3.31	-0.69	0.11	0.32	-0.16
A_72_P141396	FA2H	1.26	0.92	-2.67	-0.35	-0.43	0.04	-0.44
A_72_P392373	SLC39A14	0.71	-0.07	-1.34	-0.23	-0.06	-0.59	0.06
A_72_P117711	RPL38	0.94	0.04	-2.8	-0.37	0.69	-0.71	0.08
A_72_P297719	SPTA1	0	0	-3.84	-1.42	0	0	-1.39
A_72_P672674	TIMP1	0.66	-1.09	-0.42	0.03	0.89	0.09	-0.01
A_72_P110096	LEF1	-0.41	-1.44	-0.79	-0.01	2.23	0.59	0.37
A_72_P035346	CCL2	0.07	-0.92	-0.76	-0.23	1.13	0.08	0.59
A_72_P088231	UCHL1	0.58	-1.39	-1.57	0.32	2.11	0.18	-0.03
A_72_P008531	NRIP3	0.11	-1.11	-1.33	1.03	0.94	0.23	0.08
A_72_P767881	LOC101685910	-0.15	-1.46	-2.49	1.1	0.97	-0.1	0.89
A_72_P747409	LOC101370467	-0.26	-1.33	-1.82	1.06	0.97	-0.11	0.85
A_72_P185391	PAX7	-0.08	-0.17	-1.46	0.85	0.61	0.08	0.16
A_72_P504309	PSAT1	0.04	-0.28	-0.82	0.07	0.86	-0.12	1.42
A_72_P365418	SLC4A7	-0.12	-0.55	-1.22	0.49	1.02	-0.02	0.97
A_72_P260302	LOC100517087	-0.06	-1.01	-1.58	0.04	1.54	0	1.52
A_72_P133756	CYP7B1	-0.57	-0.97	-0.65	0.31	1.13	0.05	0.73
A_72_P350928	ARHGAP29	-0.5	-0.42	-0.65	0.22	0.9	-0.01	0.69
A_72_P191616	TAF1D	-0.04	-0.73	-1.89	0.04	0.86	0.65	0.87
A_72_P052581	DAAM2	0.18	-0.82	-1.08	0.65	0.3	-0.97	0.12
A_72_P069201	CYTL1	-0.4	-0.76	-0.62	0.78	0.55	-0.49	-0.14
A_72_P332918	LOC102527562	-0.69	-0.07	-2.6	-0.13	-0.02	0.52	0.62
A_72_P414198	LOC100515902	-0.88	0.11	-1.36	0	0.21	-0.09	0.64
A_72_P300259	NDST1	-0.51	-0.18	-0.89	0.67	0.43	0.65	0.27
A_72_P140321	LOC101282437	-0.88	-0.32	-0.88	0.53	0.19	0.96	0.19
A_72_P383368	ARIH2	-0.68	-0.14	-0.94	0.41	0.24	0.87	-0.05
A_72_P322433	TTN	-0.61	0.21	-1.16	0.4	-0.01	0.61	-0.28
A_72_P047616	NT5DC4	-1.81	-0.06	-1.73	0.61	0.53	0.41	-0.66
A_72_P672323	USF1	-0.39	-0.78	-0.72	0.44	0.02	0.6	-0.03
A_72_P141121	RRAD	-0.45	-1.24	0.15	0	-0.52	-1.49	0.71
A_72_P322658	PRKCB	0.22	-1.74	0.41	-0.34	0.37	-1.56	1.07
A_72_P343103	ETS1	-0.08	-0.99	-0.38	0.19	0.3	-0.85	0.65
A_72_P366833	DSC2	0	-5.95	-0.73	-1.46	0	0	0
A_72_P729368	MGP	-0.68	-5.35	-1.39	0.23	1.21	-0.29	-0.16
A_72_P288509	LTB	0.65	-4.82	-1.41	-0.14	0.19	0	0.39
A_72_P185296	CLU	-0.07	-4.24	-0.46	0.28	0.59	-0.16	0.79
A_72_P329118	C3H2orf40	0.51	-7.47	-1.27	-0.35	1.13	-0.18	1.15
A_72_P344573	VPREB3	0.89	-5.02	0.14	0.96	-0.57	-0.02	-0.12
A_72_P176396	FABP6	1.5	-6	0.86	-0.35	1.24	0.04	-0.78
A_72_P776097	LOC101277134	-0.07	-2.38	-0.71	0.23	1.04	-0.03	1.16
A_72_P327028	LOC100739107	-0.14	-1.93	-0.31	-0.07	0.66	0.03	1
A_72_P773461	LOC102241286	0.06	-2.7	-0.42	0.67	0.84	0.29	0.93
A_72_P188446	LOC101040975	-0.21	-3.1	-0.61	0.44	0.51	0.03	1.2
A_72_P071316	LRRK2	-0.04	-1.46	-0.53	0.18	0.82	0.33	0.79
A_72_P736382	IGHA	0.46	-2	-1.23	0.23	1.02	0	1.05
A_72_P409838	GUCY1B3	0.11	-1.82	-0.73	0.3	0.88	0.15	0.47
A_72_P150086	CCL19	-0.02	-2.35	-1.02	-0.13	1.42	-0.11	0.59
A_72_P444306	LOC100152327	-0.04	-2.02	-1.05	0.87	0.78	0.26	1.03
A_72_P774246	LOC100053571	-0.11	-2	-1.43	0.7	0.92	0.18	1.12
A_72_P157096	LOC100624077	-0.17	-1.2	-1.1	0.2	0.25	0.1	0.84
A_72_P414318	HHEX	0.07	-1.86	0.12	0.29	0.66	-0.3	0.6
A_72_P383658	SMAD9	0.85	-1.88	-0.17	-0.02	0.43	0.02	0.74
A_72_P232742	CACNB4	0.66	-0.97	0.18	-0.23	0.61	-0.17	0.61
A_72_P442002	GPSM3	0.64	-1.33	-0.36	-0.62	0.45	0.16	0.25
A_72_P006471	DOK3	0.88	-1.75	-0.7	-0.68	0.33	-0.12	0.05
A_72_P071401	MEF2B	0.85	-2.64	-0.06	-1.95	0.08	0.02	-0.05
A_72_P035636	CNN1	0.87	-1.23	-0.72	-0.42	0.15	0.05	-0.55
A_72_P159686	TMEM154	-0.65	-0.65	0	-0.23	0.81	0.25	0.31
A_72_P365683	MST4	-0.32	-0.86	0.65	-0.14	0.53	0.06	0.97
A_72_P252217	LOC100519563	-0.19	-1.01	0.62	-0.32	0.57	-0.09	1.13
A_72_P502579	ARHGAP30	-0.38	-1.23	0.86	-0.22	0.66	-0.05	0.76
A_72_P141281	CPXM2	-0.24	-1.02	0.86	-0.34	0.75	0.04	0.71
A_72_P178131	CD2	-0.32	-0.83	0.7	-0.24	0.67	-0.12	0.52
A_72_P410468	STAP1	-0.31	-0.61	0.29	-0.01	0.74	0.05	0.97
A_72_P008936	FYN	-0.74	-0.73	0.61	-0.22	0.91	0.09	0.9
A_72_P185246	CCR10	-0.34	-0.86	0.6	-0.08	0.82	0.38	0.87
A_72_P319733	ST8SIA1	-0.34	-0.68	1.09	-0.48	0.66	-0.06	0.61
A_72_P295124	XYLT1	0.43	-1.93	0.54	-0.2	0.7	0.05	0.6
A_72_P232472	CD180	0.36	-1.74	0.61	-0.52	0.63	-0.15	0.32
A_72_P329083	DTX1	0.12	-0.68	0.39	-0.3	0.69	-0.32	0.6
A_72_P399773	SIT1	0.15	-1.71	0.47	-0.26	0.88	-0.08	1
A_72_P332678	KCNAB2	0.4	-1.23	0.31	-0.27	0.9	0.09	0.81
A_72_P293799	PIP4K2A	-0.12	-1.09	0.47	-0.35	0.66	0.01	0.74
A_72_P443441	CD247	-0.1	-1.08	0.6	-0.44	0.64	0	0.7
A_72_P223892	SCG5	0.24	-1.1	0.71	-0.47	0.68	0.04	0.77
A_72_P055756	CYFIP2	-0.25	-1.83	0.28	-0.13	0.61	0.06	0.72
A_72_P432739	CORO1A	-0.02	-1.83	0.13	-0.55	0.62	0.05	0.8
A_72_P174101	FAM65B	-0.59	-1.93	0.32	-0.87	0.54	0.24	0.79
A_72_P146401	SERPINF1	-0.07	-0.76	0.05	-0.16	0.75	-0.02	0.77
A_72_P100526	ITGA4	-0.47	-1.28	0.18	0.04	0.8	0.13	0.69
A_72_P761599	LOC396596	0.57	-0.72	0	-0.74	1.19	0	0.4
A_72_P395733	ITGAL	0.33	-0.69	0.34	-0.64	0.63	-0.05	0.07
A_72_P375623	SLA-DOA	0.48	-0.7	0.29	-0.69	0.27	0.15	0.59
