# Supplementary material for: Effects of Digested Onion Extracts on Intestinal Gene Expression: An Interspecies Comparison Using Different Intestine Models
Source: PLoS One. 2016 Sep 15;11(9):e0160719. doi: 10.1371/journal.pone.0160719 (PMC5025074; doi:10.1371/journal.pone.0160719)
Supplement: S5 Table — For SISP arrays, the FC of all individual test-pigs (denoted by a number) are presented. For all three species/arrays official human gene-symbols [Gene names] are provided according to the HUGO Gene Nomenclature Committee. The reader may sort specific lists of regulated genes by using the [up /down], [species-array], or ["array experiment" (e.g. Caco-2 Yod/Sd] headers. (XLSX) [file pone.0160719.s005.xlsx]

## Sheet: Suppl Table S5
adj.P.Val	P.Value			Description	duplicate is "2"	Yod/Sd 2	Yod/Sd 4	average Yod/Sd	Wod/Sd 5	GeneSymbol	Yod/Sd 1	Wod/Sd 6	Wod/Sd 7	Wod/Sd 8
0.168011	0.00379621			PREDICTED: Sus scrofa secretin (SCT), mR_	1	0.961679	2.34928	2.32705	5.6597	SCT	3.67019	1.62874	0.537232	1.8501
0.188698	0.00446251			Sus scrofa pancreatic and duode_l homeobox 1 (PDX1), mR_	1	0.953995	3.79222	2.67573	1.85821	PDX1	3.28098	2.73115	1.03205	2.80325
0.188325	0.00442782			PREDICTED: Sus scrofa uncharacterized LOC102161154 (LOC102161154), misc_R_	1	0.894972	0.446947	0.615595	0.660687	LOC102161154	0.504864	0.603854	1.97399	0.516478
0.347688	0.0101234			Sus scrofa folate hydrolase (prostate-specific membrane antigen) 1 (FOLH1), mR_	1	0.948665	4.13355	3.53508	3.9023	FOLH1	5.52302	2.36325	0.451825	1.67437
0.069018	0.00124076			Sus scrofa aldo-keto reductase family 1 member C2-like (LOC733635), mR_	1	0.905511	2.54822	3.15972	9.70524	AKR1C2	6.02542	5.89356	0.146524	5.70903
0.0840807	0.00157972			Sus scrofa aldo-keto reductase family 1, member C1 (AKR1C1), mR_	1	1.0512	3.01959	3.3768	13.7523	AKR1C1	6.0596	8.92793	0.173002	6.61791
S5_Table
Significantly differential expressed probes (ID) extracted from data-files of Rat, Caco2 and Pig-SISP arrays with a p-value <0.05 and a Fold Change (FC; Yod or Wod over Sd) of < 1.5 (up) or < 0.66 (down). For SISP arrays the FC off all individual test-pigs (denoted by a number) are presented. For all three species/arrays official human gene-symbols [Gene names] are provided according to the HUGO …
Description	Genesymbol	species-array	up/down	Rat Wod/Sd	Caco-2 Wod/Sd	Pig-SISP Wod/Sd 5	Pig-SISP Wod/Sd 6	Pig-SISP Wod/Sd 7	Pig-SISP Wod/Sd 8	Rat Yod/Sd	Caco-2 Yod/Sd	Pig-SISP Yod/Sd 1	Pig-SISP Yod/Sd 2	Pig-SISP Yod/Sd 4
NAD(P)H dehydrogenase, quinone 1	Nqo1	Caco2-Rat	up	5.21656	1.5307	_	_	_	_	5.28994	1.62762	_	_	_
glutamate-cysteine ligase, catalytic subunit	Gclc	Caco2-Rat	up	4.272	2.63471	_	_	_	_	4.27407	2.76297	_	_	_
heme oxygenase (decycling) 1	Hmox1	Caco2-Rat	up	3.53606	2.94764	_	_	_	_	3.12965	2.357	_	_	_
prostaglandin reductase 1	Ptgr1	Caco2-Rat	up	2.93808	1.56504	_	_	_	_	3.0051	1.54079	_	_	_
oxidative stress induced growth inhibitor 1	Osgin1	Caco2-Rat	up	2.48912	1.92568	_	_	_	_	2.6135	1.7405	_	_	_
UDP-glucose 6-dehydrogenase	Ugdh	Caco2-Rat	up	2.42683	1.70179	_	_	_	_	2.40775	1.75551	_	_	_
glutamate cysteine ligase, modifier subunit	Gclm	Caco2-Rat	up	2.07698	3.28256	_	_	_	_	2.02291	3.22815	_	_	_
sulfiredoxin 1	Srxn1	Caco2-Rat	up	2.04765	2.90952	_	_	_	_	2.05447	2.89066	_	_	_
canopy 4 homolog (zebrafish)	Cnpy4	Caco2-Rat	up	1.84282	1.58244	_	_	_	_	1.74787	1.71208	_	_	_
syntaxin binding protein 1	Stxbp1	Caco2-Rat	up	1.77244	2.22564	_	_	_	_	1.57489	1.84835	_	_	_
heat shock protein 1	Hspb1	Caco2-Rat	up	1.72568	1.50238	_	_	_	_	1.7137	1.65743	_	_	_
ATP-binding cassette, subfamily C (CFTR/MRP), member 5	Abcc5	Caco2-Rat	up	1.69346	1.84934	_	_	_	_	1.86707	2.2291	_	_	_
EP300 interacting inhibitor of differentiation 3	Eid3	Caco2-Rat	up	1.69099	1.69249	_	_	_	_	1.62516	2.15098	_	_	_
hydroxysteroid (17-beta) dehydrogenase 7	Hsd17b7	Caco2-Rat	down	0.607728	0.55232	_	_	_	_	0.613241	0.473782	_	_	_
RAS guanyl releasing protein 3 (calcium and DAG-regulated)	Rasgrp3	Caco2-Rat	down	0.569038	0.654919	_	_	_	_	0.605134	0.54612	_	_	_
annexin A1	ANXA1	Caco-2	up	_	1.55921	_	_	_	_	_	2.40498	_	_	_
beta-1,4-N-acetyl-galactosaminyl transferase 1	B4GALNT1	Caco-2	up	_	2.05655	_	_	_	_	_	1.76004	_	_	_
blood vessel epicardial substance	BVES	Caco-2	up	_	2.19344	_	_	_	_	_	1.91599	_	_	_
carbonic anhydrase II	CA2	Caco-2	up	_	1.71913	_	_	_	_	_	2.17111	_	_	_
calcium channel, voltage-dependent, beta 3 subunit	CACNB3	Caco-2	up	_	1.80596	_	_	_	_	_	1.90237	_	_	_
coiled-coil domain containing 103	CCDC103	Caco-2	up	_	1.551	_	_	_	_	_	2.33382	_	_	_
coiled-coil domain containing 88A	CCDC88A	Caco-2	up	_	1.93309	_	_	_	_	_	1.73894	_	_	_
cadherin 24, type 2	CDH24	Caco-2	up	_	1.62106	_	_	_	_	_	1.70324	_	_	_
claudin 3	CLDN3	Caco-2	up	_	1.5053	_	_	_	_	_	1.71021	_	_	_
cAMP responsive element binding protein 5	CREB5	Caco-2	up	_	1.51911	_	_	_	_	_	2.25191	_	_	_
fidgetin-like 2	FIGNL2	Caco-2	up	_	1.50069	_	_	_	_	_	1.68967	_	_	_
gamma-aminobutyric acid (GABA) B receptor, 1	GABBR1	Caco-2	up	_	1.724	_	_	_	_	_	1.5464	_	_	_
guanine nucleotide binding protein (G protein), alpha z polypeptide	GNAZ	Caco-2	up	_	1.50482	_	_	_	_	_	1.60928	_	_	_
G protein-coupled receptor, family C, group 5, member B	GPRC5B	Caco-2	up	_	1.74343	_	_	_	_	_	1.79786	_	_	_
glutathione peroxidase 2 (gastrointestinal)	GPX2	Caco-2	up	_	3.08769	_	_	_	_	_	3.58365	_	_	_
heat shock 70kDa protein 1B	HSPA1B	Caco-2	up	_	1.6875	_	_	_	_	_	1.55343	_	_	_
kinesin family member 3A	KIF3A	Caco-2	up	_	1.6236	_	_	_	_	_	1.9035	_	_	_
kinesin family member 3C	KIF3C	Caco-2	up	_	2.05241	_	_	_	_	_	2.47039	_	_	_
low density lipoprotein receptor-related protein 12	LRP12	Caco-2	up	_	2.15296	_	_	_	_	_	2.23344	_	_	_
microtubule-associated protein 1A	MAP1A	Caco-2	up	_	2.63578	_	_	_	_	_	2.18774	_	_	_
melanoma cell adhesion molecule	MCAM	Caco-2	up	_	1.74496	_	_	_	_	_	2.29197	_	_	_
myeloid/lymphoid or mixed-lineage leukemia (trithorax homolog, Drosophila) translocated to, 11	MLLT11	Caco-2	up	_	2.24603	_	_	_	_	_	2.0008	_	_	_
neuronal pentraxin I	NPTX1	Caco-2	up	_	1.54721	_	_	_	_	_	2.22216	_	_	_
nuclear receptor interacting protein 3	NRIP3	Caco-2	up	_	1.5436	_	_	_	_	_	1.72049	_	_	_
OTU domain, ubiquitin aldehyde binding 2	OTUB2	Caco-2	up	_	1.65712	_	_	_	_	_	2.15059	_	_	_
pleckstrin homology domain containing, family M (with RUN domain) member 1	PLEKHM1	Caco-2	up	_	1.64632	_	_	_	_	_	1.77476	_	_	_
processing of precursor 1, ribonuclease P/MRP subunit (S. cerevisiae)	POP1	Caco-2	up	_	1.51828	_	_	_	_	_	1.7257	_	_	_
phosphatidic acid phosphatase type 2C	PPAP2C	Caco-2	up	_	1.59485	_	_	_	_	_	1.79132	_	_	_
RAB31, member RAS oncogene family	RAB31	Caco-2	up	_	2.01584	_	_	_	_	_	2.35541	_	_	_
RNA binding motif protein 24	RBM24	Caco-2	up	_	1.53837	_	_	_	_	_	1.61872	_	_	_
septin 3	SEPT3	Caco-2	up	_	2.52055	_	_	_	_	_	1.7919	_	_	_
serpin peptidase inhibitor, clade E (nexin, plasminogen activator inhibitor type 1), member 1	SERPINE1	Caco-2	up	_	1.57486	_	_	_	_	_	2.10663	_	_	_
serpin peptidase inhibitor, clade E (nexin, plasminogen activator inhibitor type 1), member 2	SERPINE2	Caco-2	up	_	1.67189	_	_	_	_	_	2.19392	_	_	_
sarcoglycan, beta (43kDa dystrophin-associated glycoprotein)	SGCB	Caco-2	up	_	1.55545	_	_	_	_	_	1.62836	_	_	_
solute carrier family 29 (equilibrative nucleoside transporter), member 3	SLC29A3	Caco-2	up	_	1.78288	_	_	_	_	_	1.75444	_	_	_
solute carrier family 4, sodium borate transporter, member 11	SLC4A11	Caco-2	up	_	1.66841	_	_	_	_	_	1.67499	_	_	_
solute carrier family 7 (anionic amino acid transporter light chain, xc- system), member 11	SLC7A11	Caco-2	up	_	3.77339	_	_	_	_	_	3.89811	_	_	_
suppressor of glucose, autophagy associated 1	SOGA1	Caco-2	up	_	1.51026	_	_	_	_	_	1.58359	_	_	_
syntaxin 2	STX2	Caco-2	up	_	1.67317	_	_	_	_	_	1.58109	_	_	_
tryptophan 2,3-dioxygenase	TDO2	Caco-2	up	_	2.73605	_	_	_	_	_	3.64455	_	_	_
tubulin tyrosine ligase	TTL	Caco-2	up	_	1.55569	_	_	_	_	_	1.76393	_	_	_
thioredoxin reductase 1	TXNRD1	Caco-2	up	_	3.00412	_	_	_	_	_	3.05014	_	_	_
ubiquitin carboxyl-terminal esterase L1 (ubiquitin thiolesterase)	UCHL1	Caco-2	up	_	1.79387	_	_	_	_	_	1.83184	_	_	_
WAS protein family, member 1	WASF1	Caco-2	up	_	1.8284	_	_	_	_	_	2.23554	_	_	_
acyl-CoA oxidase 2, branched chain	ACOX2	Caco-2	down	_	0.586732	_	_	_	_	_	0.464901	_	_	_
alcohol dehydrogenase 4 (class II), pi polypeptide	ADH4	Caco-2	down	_	0.636941	_	_	_	_	_	0.542638	_	_	_
ankyrin repeat domain 37	ANKRD37	Caco-2	down	_	0.664718	_	_	_	_	_	0.563877	_	_	_
complement component 4 binding protein, beta	C4BPB	Caco-2	down	_	0.651926	_	_	_	_	_	0.582885	_	_	_
cell division cycle 14A	CDC14A	Caco-2	down	_	0.621697	_	_	_	_	_	0.62178	_	_	_
CREB3 regulatory factor	CREBRF	Caco-2	down	_	0.599358	_	_	_	_	_	0.47603	_	_	_
death-associated protein kinase 1	DAPK1	Caco-2	down	_	0.567549	_	_	_	_	_	0.490674	_	_	_
DEP domain containing 1	DEPDC1	Caco-2	down	_	0.625571	_	_	_	_	_	0.473497	_	_	_
dehydrogenase/reductase (SDR family) member 3	DHRS3	Caco-2	down	_	0.663667	_	_	_	_	_	0.641767	_	_	_
flavin containing monooxygenase 1	FMO1	Caco-2	down	_	0.654169	_	_	_	_	_	0.525632	_	_	_
glucose-6-phosphatase, catalytic subunit	G6PC	Caco-2	down	_	0.624388	_	_	_	_	_	0.467985	_	_	_
growth factor receptor-bound protein 7	GRB7	Caco-2	down	_	0.525732	_	_	_	_	_	0.524664	_	_	_
glycogen synthase 2 (liver)	GYS2	Caco-2	down	_	0.604187	_	_	_	_	_	0.48934	_	_	_
hypoxia inducible lipid droplet-associated	HILPDA	Caco-2	down	_	0.625359	_	_	_	_	_	0.479739	_	_	_
hexokinase 2	HK2	Caco-2	down	_	0.655859	_	_	_	_	_	0.659524	_	_	_
hepatocyte nuclear factor 4, gamma	HNF4G	Caco-2	down	_	0.656149	_	_	_	_	_	0.499035	_	_	_
interferon-induced protein with tetratricopeptide repeats 1	IFIT1	Caco-2	down	_	0.589133	_	_	_	_	_	0.378209	_	_	_
interferon-induced protein with tetratricopeptide repeats 2	IFIT2	Caco-2	down	_	0.595491	_	_	_	_	_	0.418294	_	_	_
insulin induced gene 1	INSIG1	Caco-2	down	_	0.561122	_	_	_	_	_	0.488801	_	_	_
kelch-like family member 24	KLHL24	Caco-2	down	_	0.598112	_	_	_	_	_	0.42626	_	_	_
lipase, endothelial	LIPG	Caco-2	down	_	0.626727	_	_	_	_	_	0.602676	_	_	_
N-acetyltransferase 8 (GCN5-related, putative)	NAT8	Caco-2	down	_	0.620032	_	_	_	_	_	0.441489	_	_	_
period circadian clock 1	PER1	Caco-2	down	_	0.658799	_	_	_	_	_	0.641134	_	_	_
phosphatidylinositol-4-phosphate 5-kinase, type I, beta	PIP5K1B	Caco-2	down	_	0.587532	_	_	_	_	_	0.467722	_	_	_
Rap guanine nucleotide exchange factor (GEF) 5	RAPGEF5	Caco-2	down	_	0.659433	_	_	_	_	_	0.603268	_	_	_
retinoic acid receptor, beta	RARB	Caco-2	down	_	0.611562	_	_	_	_	_	0.477359	_	_	_
solute carrier family 19 (thiamine transporter), member 3	SLC19A3	Caco-2	down	_	0.58604	_	_	_	_	_	0.413652	_	_	_
solute carrier family 5 (sodium/monocarboxylate cotransporter), member 12	SLC5A12	Caco-2	down	_	0.648039	_	_	_	_	_	0.592764	_	_	_
sphingomyelin phosphodiesterase 3, neutral membrane (neutral sphingomyelinase II)	SMPD3	Caco-2	down	_	0.638761	_	_	_	_	_	0.506329	_	_	_
StAR-related lipid transfer (START) domain containing 4	STARD4	Caco-2	down	_	0.603364	_	_	_	_	_	0.567048	_	_	_
t-complex 11, testis-specific-like 2	TCP11L2	Caco-2	down	_	0.581736	_	_	_	_	_	0.472532	_	_	_
xanthine dehydrogenase	XDH	Caco-2	down	_	0.665782	_	_	_	_	_	0.608348	_	_	_
aldo-keto reductase family 1, member C1	Akr1c1	Caco-2-Pig	up	_	2.61883	13.7523	8.92793	0.173002	6.61791	_	3.16499	6.0596	_	3.01959
aldo-keto reductase family 1, member C2	Akr1c2	Caco-2-Pig	up	_	2.10746	9.70524	5.89356	0.146524	5.70903	_	2.14078	6.02542	_	2.54822
Sus scrofa folate hydrolase (prostate-specific membrane antigen) 1 (FOLH1), mRNA	FOLH1	Pig	up	_	_	3.9023	2.36325	0.451825	1.67437	_	_	5.52302	_	4.13355
Sus scrofa pancreatic and duodenal homeobox 1 (PDX1), mRNA	PDX1	Pig	up	_	_	1.85821	2.73115	_	2.80325	_	_	3.28098	_	3.79222
PREDICTED: Sus scrofa secretin (SCT), mRNA	SCT	Pig	up	_	_	5.6597	1.62874	0.537232	1.8501	_	_	3.67019	_	2.34928
solute carrier family 16, member 5 (monocarboxylic acid transporter 6)	Slc16a5	Rat	up	16.0309	_	_	_	_	_	16.5111	_	_	_	_
alcohol dehydrogenase 4 (class II), pi polypeptide	Adh4	Rat	up	7.92078	_	_	_	_	_	8.22242	_	_	_	_
phosphoenolpyruvate carboxykinase 1 (soluble)	Pck1	Rat	up	7.12805	_	_	_	_	_	4.77359	_	_	_	_
glucose-6-phosphatase, catalytic subunit	G6pc	Rat	up	5.32695	_	_	_	_	_	4.97866	_	_	_	_
HIV-1 Tat interactive protein 2	Htatip2	Rat	up	5.21555	_	_	_	_	_	5.60574	_	_	_	_
cholinergic receptor, nicotinic, epsilon (muscle)	Chrne	Rat	up	3.62411	_	_	_	_	_	3.90541	_	_	_	_
choline dehydrogenase	Chdh	Rat	up	3.37421	_	_	_	_	_	3.09561	_	_	_	_
ectonucleoside triphosphate diphosphohydrolase 5	Entpd5	Rat	up	3.34845	_	_	_	_	_	3.32658	_	_	_	_
dopa decarboxylase (aromatic L-amino acid decarboxylase)	Ddc	Rat	up	3.22063	_	_	_	_	_	3.21061	_	_	_	_
epoxide hydrolase 1, microsomal (xenobiotic)	Ephx1	Rat	up	3.08593	_	_	_	_	_	3.36383	_	_	_	_
SEC14-like 2 (S. cerevisiae)	Sec14l2	Rat	up	3.05769	_	_	_	_	_	3.05673	_	_	_	_
monoamine oxidase A	Maoa	Rat	up	2.90075	_	_	_	_	_	3.25987	_	_	_	_
tsukushi, small leucine rich proteoglycan	Tsku	Rat	up	2.84031	_	_	_	_	_	2.98446	_	_	_	_
solute carrier family 39 (zinc transporter), member 4	Slc39a4	Rat	up	2.80486	_	_	_	_	_	3.81693	_	_	_	_
adrenomedullin	Adm	Rat	up	2.76614	_	_	_	_	_	2.34169	_	_	_	_
solute carrier family 6 (neurotransmitter transporter, betaine/GABA), member 12	Slc6a12	Rat	up	2.66765	_	_	_	_	_	2.95514	_	_	_	_
aldo-keto reductase family 1, member B1 (aldose reductase)	Akr1b1	Rat	up	2.49001	_	_	_	_	_	2.52524	_	_	_	_
cellular repressor of E1A-stimulated genes 1	Creg1	Rat	up	2.42463	_	_	_	_	_	2.47566	_	_	_	_
interleukin 17 receptor B	Il17rb	Rat	up	2.40297	_	_	_	_	_	2.19646	_	_	_	_
prenylcysteine oxidase 1	Pcyox1	Rat	up	2.35373	_	_	_	_	_	2.71327	_	_	_	_
solute carrier family 37 (glycerol-3-phosphate transporter), member 2	Slc37a2	Rat	up	2.34135	_	_	_	_	_	1.86289	_	_	_	_
solute carrier family 48 (heme transporter), member 1	Slc48a1	Rat	up	2.31099	_	_	_	_	_	1.92252	_	_	_	_
chemokine (C-X-C motif) ligand 2	Cxcl2	Rat	up	2.30882	_	_	_	_	_	1.93918	_	_	_	_
FXYD domain-containing ion transport regulator 2	Fxyd2	Rat	up	2.27854	_	_	_	_	_	2.18251	_	_	_	_
growth differentiation factor 15	Gdf15	Rat	up	2.25915	_	_	_	_	_	2.40224	_	_	_	_
inositol polyphosphate-5-phosphatase J	Inpp5j	Rat	up	2.23275	_	_	_	_	_	2.5296	_	_	_	_
retinol binding protein 7, cellular	Rbp7	Rat	up	2.18908	_	_	_	_	_	2.15357	_	_	_	_
interleukin 6	Il6	Rat	up	2.15818	_	_	_	_	_	1.67191	_	_	_	_
junctional adhesion molecule 3	Jam3	Rat	up	2.15288	_	_	_	_	_	1.76465	_	_	_	_
serum/glucocorticoid regulated kinase 2	Sgk2	Rat	up	2.14546	_	_	_	_	_	1.72905	_	_	_	_
solute carrier family 43, member 2	Slc43a2	Rat	up	2.12705	_	_	_	_	_	1.97811	_	_	_	_
solute carrier family 35, member E3	Slc35e3	Rat	up	2.09377	_	_	_	_	_	2.12111	_	_	_	_
microsomal glutathione S-transferase 2	Mgst2	Rat	up	2.09248	_	_	_	_	_	2.22015	_	_	_	_
ERO1-like (S. cerevisiae)	Ero1l	Rat	up	2.07703	_	_	_	_	_	2.11781	_	_	_	_
glutathione S-transferase Yc2 subunit	Gsta3	Rat	up	2.07468	_	_	_	_	_	1.98561	_	_	_	_
glutathione S-transferase alpha 4	Gsta4	Rat	up	2.07062	_	_	_	_	_	2.22216	_	_	_	_
pyruvate dehydrogenase kinase, isozyme 2	Pdk2	Rat	up	2.06177	_	_	_	_	_	2.20265	_	_	_	_
solute carrier family 2 (facilitated glucose/fructose transporter), member 5	Slc2a5	Rat	up	2.03964	_	_	_	_	_	2.09745	_	_	_	_
serine active site containing 1	Serac1	Rat	up	2.02801	_	_	_	_	_	2.10097	_	_	_	_
toll-like receptor 7	Tlr7	Rat	up	1.99686	_	_	_	_	_	2.06828	_	_	_	_
sialidase 1 (lysosomal sialidase)	Neu1	Rat	up	1.98982	_	_	_	_	_	2.01176	_	_	_	_
peroxisome proliferator-activated receptor gamma, coactivator 1 alpha	Ppargc1a	Rat	up	1.98648	_	_	_	_	_	1.73982	_	_	_	_
synaptopodin 2	Synpo2	Rat	up	1.97925	_	_	_	_	_	1.74506	_	_	_	_
ZW10 interactor	Zwint	Rat	up	1.97358	_	_	_	_	_	1.98985	_	_	_	_
leukemia inhibitory factor	Lif	Rat	up	1.95231	_	_	_	_	_	1.70195	_	_	_	_
leukemia inhibitory factor receptor alpha	Lifr	Rat	up	1.93567	_	_	_	_	_	1.77859	_	_	_	_
arachidonate 12-lipoxygenase	Alox12	Rat	up	1.92398	_	_	_	_	_	2.21357	_	_	_	_
solute carrier family 52, riboflavin transporter, member 2	Slc52a2	Rat	up	1.91625	_	_	_	_	_	1.9294	_	_	_	_
nudix (nucleoside diphosphate linked moiety X)-type motif 12	Nudt12	Rat	up	1.91605	_	_	_	_	_	1.81981	_	_	_	_
pregnancy-associated plasma protein A	Pappa	Rat	up	1.91034	_	_	_	_	_	1.72121	_	_	_	_
solute carrier family 46, member 3	Slc46a3	Rat	up	1.89843	_	_	_	_	_	1.92923	_	_	_	_
chemokine (C-C motif) ligand 24	Ccl24	Rat	up	1.89225	_	_	_	_	_	1.61984	_	_	_	_
pyruvate dehydrogenase kinase, isozyme 4	Pdk4	Rat	up	1.87977	_	_	_	_	_	1.93742	_	_	_	_
peroxisome proliferator activated receptor alpha	Ppara	Rat	up	1.8793	_	_	_	_	_	1.91012	_	_	_	_
heat shock 105/110 protein 1	Hsph1	Rat	up	1.87482	_	_	_	_	_	1.89876	_	_	_	_
proteasome (prosome, macropain) 26S subunit, non-ATPase, 5	Psmd5	Rat	up	1.86601	_	_	_	_	_	1.78724	_	_	_	_
EGL nine homolog 3 (C. elegans)	Egln3	Rat	up	1.86584	_	_	_	_	_	1.73501	_	_	_	_
potassium inwardly-rectifying channel, subfamily J, member 13	Kcnj13	Rat	up	1.8639	_	_	_	_	_	1.50378	_	_	_	_
solute carrier family 5 (sodium/myo-inositol cotransporter), member 3	Slc5a3	Rat	up	1.86241	_	_	_	_	_	1.84281	_	_	_	_
ubiquitin specific peptidase 2	Usp2	Rat	up	1.85761	_	_	_	_	_	1.54471	_	_	_	_
molybdenum cofactor synthesis 1	Mocs1	Rat	up	1.85758	_	_	_	_	_	1.98744	_	_	_	_
MORC family CW-type zinc finger 4	Morc4	Rat	up	1.84873	_	_	_	_	_	1.9928	_	_	_	_
malic enzyme 1, NADP(+)-dependent, cytosolic	Me1	Rat	up	1.84704	_	_	_	_	_	1.90076	_	_	_	_
tubulin folding cofactor E-like	Tbcel	Rat	up	1.8451	_	_	_	_	_	1.68024	_	_	_	_
sorting nexin 10	Snx10	Rat	up	1.8409	_	_	_	_	_	1.67826	_	_	_	_
glutathione S-transferase alpha 5	Gsta5	Rat	up	1.834	_	_	_	_	_	2.01157	_	_	_	_
biliverdin reductase B (flavin reductase (NADPH))	Blvrb	Rat	up	1.83218	_	_	_	_	_	1.63186	_	_	_	_
cholinergic receptor, muscarinic 3	Chrm3	Rat	up	1.82787	_	_	_	_	_	1.86297	_	_	_	_
phosphoglucomutase 1	Pgm1	Rat	up	1.81481	_	_	_	_	_	2.03506	_	_	_	_
synemin, intermediate filament protein	Synm	Rat	up	1.80836	_	_	_	_	_	1.75321	_	_	_	_
chromobox homolog 6	Cbx6	Rat	up	1.80565	_	_	_	_	_	1.69006	_	_	_	_
beta-carotene 15,15'-monooxygenase 1	Bcmo1	Rat	up	1.80522	_	_	_	_	_	1.83901	_	_	_	_
prostaglandin-endoperoxide synthase 2	Ptgs2	Rat	up	1.80274	_	_	_	_	_	1.70992	_	_	_	_
fructose-1,6-bisphosphatase 1	Fbp1	Rat	up	1.79637	_	_	_	_	_	1.70426	_	_	_	_
Cd4 molecule	Cd4	Rat	up	1.79286	_	_	_	_	_	1.72939	_	_	_	_
D-amino-acid oxidase	Dao	Rat	up	1.79228	_	_	_	_	_	2.017	_	_	_	_
patatin-like phospholipase domain containing 3	Pnpla3	Rat	up	1.78891	_	_	_	_	_	1.80201	_	_	_	_
solute carrier family 25, member 42	Slc25a42	Rat	up	1.78522	_	_	_	_	_	1.89419	_	_	_	_
chemokine (C-X-C motif) ligand 10	Cxcl10	Rat	up	1.77849	_	_	_	_	_	1.60794	_	_	_	_
phosphorylase, glycogen, muscle	Pygm	Rat	up	1.77087	_	_	_	_	_	1.74679	_	_	_	_
short chain dehydrogenase/reductase family 42E, member 1	Sdr42e1	Rat	up	1.76166	_	_	_	_	_	1.62721	_	_	_	_
glutathione S-transferase mu 2	Gstm2	Rat	up	1.74774	_	_	_	_	_	1.84927	_	_	_	_
HAUS augmin-like complex, subunit 8	Haus8	Rat	up	1.72996	_	_	_	_	_	1.57946	_	_	_	_
kinesin family member C2	KIFC2	Rat	up	1.72266	_	_	_	_	_	1.62634	_	_	_	_
cask-interacting protein 2	Caskin2	Rat	up	1.71287	_	_	_	_	_	1.92362	_	_	_	_
inducible T-cell co-stimulator	Icos	Rat	up	1.71179	_	_	_	_	_	1.51682	_	_	_	_
Ras-related GTP binding D	Rragd	Rat	up	1.70918	_	_	_	_	_	1.79839	_	_	_	_
solute carrier family 16, member 13 (monocarboxylic acid transporter 13)	Slc16a13	Rat	up	1.70824	_	_	_	_	_	1.74775	_	_	_	_
one cut homeobox 2	Onecut2	Rat	up	1.70085	_	_	_	_	_	2.12277	_	_	_	_
pleiomorphic adenoma gene-like 1	Plagl1	Rat	up	1.69799	_	_	_	_	_	1.50489	_	_	_	_
polo-like kinase 3	Plk3	Rat	up	1.69681	_	_	_	_	_	1.71427	_	_	_	_
transmembrane protein 189	Tmem189	Rat	up	1.69253	_	_	_	_	_	1.67774	_	_	_	_
DnaJ (Hsp40) homolog, subfamily C, member 25	Dnajc25	Rat	up	1.68934	_	_	_	_	_	1.79227	_	_	_	_
ATP-binding cassette, subfamily C (CFTR/MRP), member 2	Abcc2	Rat	up	1.68006	_	_	_	_	_	1.71612	_	_	_	_
ATP-binding cassette, subfamily B (MDR/TAP), member 9	Abcb9	Rat	up	1.67775	_	_	_	_	_	1.67179	_	_	_	_
erythrocyte membrane protein band 4.1-like 3	Epb41l3	Rat	up	1.66949	_	_	_	_	_	1.60768	_	_	_	_
adaptor-related protein complex 1, sigma 2 subunit	Ap1s2	Rat	up	1.66724	_	_	_	_	_	1.56137	_	_	_	_
crystallin, lambda 1	Cryl1	Rat	up	1.6557	_	_	_	_	_	1.65774	_	_	_	_
beta-carotene oxygenase 2	Bco2	Rat	up	1.65085	_	_	_	_	_	1.60032	_	_	_	_
prion protein	Prnp	Rat	up	1.65028	_	_	_	_	_	1.51967	_	_	_	_
integrin, alpha 2B	Itga2b	Rat	up	1.64814	_	_	_	_	_	1.50751	_	_	_	_
low density lipoprotein receptor-related protein 8, apolipoprotein e receptor	Lrp8	Rat	up	1.64048	_	_	_	_	_	1.64502	_	_	_	_
glycerophosphocholine phosphodiesterase GDE1 homolog (S. cerevisiae)	Gpcpd1	Rat	up	1.63461	_	_	_	_	_	1.56997	_	_	_	_
CDP-diacylglycerol synthase (phosphatidate cytidylyltransferase) 2	Cds2	Rat	up	1.6288	_	_	_	_	_	1.54593	_	_	_	_
nuclear receptor subfamily 0, group B, member 2	Nr0b2	Rat	up	1.62849	_	_	_	_	_	1.51365	_	_	_	_
four and a half LIM domains 1	Fhl1	Rat	up	1.62803	_	_	_	_	_	1.65576	_	_	_	_
D-dopachrome tautomerase	Ddt	Rat	up	1.6268	_	_	_	_	_	1.74012	_	_	_	_
cytoplasmic linker associated protein 1	Clasp1	Rat	up	1.62474	_	_	_	_	_	1.57617	_	_	_	_
palmitoyl-protein thioesterase 2	Ppt2	Rat	up	1.62152	_	_	_	_	_	1.85571	_	_	_	_
N-myristoyltransferase 1	Nmt1	Rat	up	1.62082	_	_	_	_	_	1.71651	_	_	_	_
ephrin A4	Efna4	Rat	up	1.61958	_	_	_	_	_	1.50141	_	_	_	_
DnaJ (Hsp40) homolog, subfamily C, member 12	Dnajc12	Rat	up	1.61797	_	_	_	_	_	1.80614	_	_	_	_
argonaute RISC catalytic component 3	Ago3	Rat	up	1.61794	_	_	_	_	_	1.92813	_	_	_	_
progestin and adipoQ receptor family member VII	Paqr7	Rat	up	1.61062	_	_	_	_	_	1.54454	_	_	_	_
solute carrier family 25, member 44	Slc25a44	Rat	up	1.60383	_	_	_	_	_	1.69829	_	_	_	_
centrosomal protein 76	Cep76	Rat	up	1.59815	_	_	_	_	_	1.62957	_	_	_	_
glycogen synthase 1, muscle	Gys1	Rat	up	1.59538	_	_	_	_	_	1.99538	_	_	_	_
ectonucleotide pyrophosphatase/phosphodiesterase 2	Enpp2	Rat	up	1.59292	_	_	_	_	_	1.5204	_	_	_	_
chondroitin polymerizing factor 2	Chpf2	Rat	up	1.5927	_	_	_	_	_	1.56187	_	_	_	_
phosphomannomutase 1	Pmm1	Rat	up	1.59064	_	_	_	_	_	1.55066	_	_	_	_
solute carrier family 35, member G1	Slc35g1	Rat	up	1.59057	_	_	_	_	_	1.64282	_	_	_	_
coiled-coil domain containing 126	Ccdc126	Rat	up	1.58143	_	_	_	_	_	1.50691	_	_	_	_
isocitrate dehydrogenase 1 (NADP+), soluble	Idh1	Rat	up	1.58102	_	_	_	_	_	1.64427	_	_	_	_
natriuretic peptide receptor A/guanylate cyclase A (atrionatriuretic peptide receptor A)	Npr1	Rat	up	1.58096	_	_	_	_	_	1.51469	_	_	_	_
inositol polyphosphate-5-phosphatase B	Inpp5b	Rat	up	1.5776	_	_	_	_	_	1.69673	_	_	_	_
scavenger receptor class B, member 1	Scarb1	Rat	up	1.5694	_	_	_	_	_	1.50702	_	_	_	_
glutathione S-transferase pi 1	Gstp1	Rat	up	1.56741	_	_	_	_	_	1.78792	_	_	_	_
peroxisomal membrane protein 4	Pxmp4	Rat	up	1.56488	_	_	_	_	_	1.66014	_	_	_	_
DnaJ (Hsp40) homolog, subfamily C, member 18	Dnajc18	Rat	up	1.56359	_	_	_	_	_	1.84014	_	_	_	_
differentially expressed in FDCP 8 homolog (mouse)	Def8	Rat	up	1.56213	_	_	_	_	_	1.53036	_	_	_	_
HEAT repeat containing 5A	Heatr5a	Rat	up	1.56104	_	_	_	_	_	1.635	_	_	_	_
acyl-CoA oxidase 1, palmitoyl	Acox1	Rat	up	1.56041	_	_	_	_	_	1.53091	_	_	_	_
calmin	Clmn	Rat	up	1.54795	_	_	_	_	_	1.68051	_	_	_	_
mitochondrial fission process 1	Mtfp1	Rat	up	1.54781	_	_	_	_	_	1.63219	_	_	_	_
low density lipoprotein receptor-related protein 1	Lrp1	Rat	up	1.54658	_	_	_	_	_	1.66695	_	_	_	_
CUGBP, Elav-like family member 3	Celf3	Rat	up	1.54537	_	_	_	_	_	2.04364	_	_	_	_
transmembrane protein 62	Tmem62	Rat	up	1.54079	_	_	_	_	_	1.62492	_	_	_	_
3-hydroxy-3-methylglutaryl-CoA synthase 2 (mitochondrial)	Hmgcs2	Rat	up	1.54004	_	_	_	_	_	1.90218	_	_	_	_
matrix metallopeptidase 15	Mmp15	Rat	up	1.53355	_	_	_	_	_	1.61864	_	_	_	_
family with sequence similarity 168, member A	Fam168a	Rat	up	1.53252	_	_	_	_	_	1.65519	_	_	_	_
family with sequence similarity 216, member A	Fam216a	Rat	up	1.5322	_	_	_	_	_	1.51835	_	_	_	_
mitogen activated protein kinase kinase kinase 12	Map3k12	Rat	up	1.53131	_	_	_	_	_	1.61697	_	_	_	_
zinc finger, DHHC-type containing 7	Zdhhc7	Rat	up	1.53072	_	_	_	_	_	1.53067	_	_	_	_
family with sequence similarity 13, member A	Fam13a	Rat	up	1.51856	_	_	_	_	_	1.53388	_	_	_	_
Cd81 molecule	Cd81	Rat	up	1.51555	_	_	_	_	_	1.49992	_	_	_	_
LSM10, U7 small nuclear RNA associated	Lsm10	Rat	up	1.5125	_	_	_	_	_	1.62881	_	_	_	_
coiled-coil domain containing 93	Ccdc93	Rat	up	1.5087	_	_	_	_	_	1.54687	_	_	_	_
ADAMTS-like 5	Adamtsl5	Rat	up	1.50522	_	_	_	_	_	1.58367	_	_	_	_
N-acetylglutamate synthase	Nags	Rat	up	1.50293	_	_	_	_	_	1.61049	_	_	_	_
high mobility group AT-hook 2	Hmga2	Rat	down	0.664606	_	_	_	_	_	0.647926	_	_	_	_
glycosyltransferase-like domain containing 1	Gtdc1	Rat	down	0.66333	_	_	_	_	_	0.638809	_	_	_	_
zinc finger and BTB domain containing 38	Zbtb38	Rat	down	0.663065	_	_	_	_	_	0.60298	_	_	_	_
transmembrane and coiled-coil domains 4	Tmco4	Rat	down	0.661067	_	_	_	_	_	0.613304	_	_	_	_
TBC1 domain family, member 5	Tbc1d5	Rat	down	0.66025	_	_	_	_	_	0.661033	_	_	_	_
matrix Gla protein	Mgp	Rat	down	0.660033	_	_	_	_	_	0.53335	_	_	_	_
G protein-coupled receptor 55	Gpr55	Rat	down	0.660024	_	_	_	_	_	0.659644	_	_	_	_
sterile alpha motif domain containing 5	Samd5	Rat	down	0.659823	_	_	_	_	_	0.579384	_	_	_	_
arginase, liver	Arg1	Rat	down	0.659772	_	_	_	_	_	0.604141	_	_	_	_
SRY (sex determining region Y)-box 7	Sox7	Rat	down	0.659219	_	_	_	_	_	0.660592	_	_	_	_
family with sequence similarity 43, member A	Fam43a	Rat	down	0.657857	_	_	_	_	_	0.548109	_	_	_	_
sema domain, short basic domain, secreted, (semaphorin) 3C	Sema3c	Rat	down	0.655571	_	_	_	_	_	0.501031	_	_	_	_
sprouty homolog 2 (Drosophila)	Spry2	Rat	down	0.654556	_	_	_	_	_	0.656683	_	_	_	_
acetyl-CoA carboxylase alpha	Acaca	Rat	down	0.65372	_	_	_	_	_	0.654048	_	_	_	_
purinergic receptor P2Y, G-protein coupled, 1	P2ry1	Rat	down	0.651297	_	_	_	_	_	0.639327	_	_	_	_
ADAM metallopeptidase domain 12	Adam12	Rat	down	0.649432	_	_	_	_	_	0.559347	_	_	_	_
tetratricopeptide repeat domain 9	Ttc9	Rat	down	0.648773	_	_	_	_	_	0.611097	_	_	_	_
branched chain amino acid transaminase 1, cytosolic	Bcat1	Rat	down	0.648514	_	_	_	_	_	0.530418	_	_	_	_
xylosyltransferase 1	Xylt1	Rat	down	0.645797	_	_	_	_	_	0.635305	_	_	_	_
tripartite motif-containing 40	Trim40	Rat	down	0.644415	_	_	_	_	_	0.654238	_	_	_	_
ankyrin repeat domain 28	Ankrd28	Rat	down	0.643373	_	_	_	_	_	0.533575	_	_	_	_
SMAD family member 3	Smad3	Rat	down	0.64096	_	_	_	_	_	0.635529	_	_	_	_
phosphomevalonate kinase	Pmvk	Rat	down	0.640248	_	_	_	_	_	0.634286	_	_	_	_
solute carrier family 1 (neutral amino acid transporter), member 5	Slc1a5	Rat	down	0.640012	_	_	_	_	_	0.607575	_	_	_	_
alpha-kinase 1	Alpk1	Rat	down	0.638899	_	_	_	_	_	0.541345	_	_	_	_
leucine rich adaptor protein 1-like	Lurap1l	Rat	down	0.638223	_	_	_	_	_	0.580831	_	_	_	_
eukaryotic translation initiation factor 1	Eif1	Rat	down	0.636527	_	_	_	_	_	0.661141	_	_	_	_
par-6 (partitioning defective 6) homolog beta (C. elegans)	Pard6b	Rat	down	0.635083	_	_	_	_	_	0.665625	_	_	_	_
F-box protein 4	Fbxo4	Rat	down	0.634986	_	_	_	_	_	0.625754	_	_	_	_
phosphoribosyl transferase domain containing 1	Prtfdc1	Rat	down	0.63386	_	_	_	_	_	0.567183	_	_	_	_
integrin, alpha 2	Itga2	Rat	down	0.629567	_	_	_	_	_	0.584104	_	_	_	_
pyruvate dehydrogenase kinase, isozyme 1	Pdk1	Rat	down	0.629143	_	_	_	_	_	0.655706	_	_	_	_
CD86 molecule	Cd86	Rat	down	0.626865	_	_	_	_	_	0.504153	_	_	_	_
MAP3K12 binding inhibitory protein 1	Mbip	Rat	down	0.626385	_	_	_	_	_	0.593441	_	_	_	_
myxovirus (influenza virus) resistance 2	Mx2	Rat	down	0.626159	_	_	_	_	_	0.653052	_	_	_	_
5,10-methenyltetrahydrofolate synthetase (5-formyltetrahydrofolate cyclo-ligase)	Mthfs	Rat	down	0.620759	_	_	_	_	_	0.618552	_	_	_	_
apolipoprotein D	Apod	Rat	down	0.619389	_	_	_	_	_	0.643453	_	_	_	_
transient receptor potential cation channel, subfamily C, member 6	Trpc6	Rat	down	0.619187	_	_	_	_	_	0.584401	_	_	_	_
lipocalin 2	Lcn2	Rat	down	0.618496	_	_	_	_	_	0.553503	_	_	_	_
dedicator of cyto-kinesis 1	Dock1	Rat	down	0.617013	_	_	_	_	_	0.579909	_	_	_	_
LIM domain 7	Lmo7	Rat	down	0.615912	_	_	_	_	_	0.566504	_	_	_	_
neuronal guanine nucleotide exchange factor	Ngef	Rat	down	0.613951	_	_	_	_	_	0.61985	_	_	_	_
very low density lipoprotein receptor	Vldlr	Rat	down	0.61383	_	_	_	_	_	0.533828	_	_	_	_
laminin, beta 3	Lamb3	Rat	down	0.611258	_	_	_	_	_	0.573048	_	_	_	_
tyrosyl-tRNA synthetase 2 (mitochondrial)	Yars2	Rat	down	0.60992	_	_	_	_	_	0.655974	_	_	_	_
3-hydroxy-3-methylglutaryl-CoA reductase	Hmgcr	Rat	down	0.609838	_	_	_	_	_	0.617319	_	_	_	_
forkhead box A1	Foxa1	Rat	down	0.608577	_	_	_	_	_	0.648568	_	_	_	_
tetraspanin 1	Tspan1	Rat	down	0.60735	_	_	_	_	_	0.592493	_	_	_	_
solute carrier family 25 (mitochondrial carrier, phosphate carrier), member 24	Slc25a24	Rat	down	0.605764	_	_	_	_	_	0.601799	_	_	_	_
phosphoenolpyruvate carboxykinase 2 (mitochondrial)	Pck2	Rat	down	0.604457	_	_	_	_	_	0.663797	_	_	_	_
regulator of G-protein signaling 16	Rgs16	Rat	down	0.603186	_	_	_	_	_	0.522091	_	_	_	_
pleckstrin 2	Plek2	Rat	down	0.60225	_	_	_	_	_	0.586685	_	_	_	_
mitogen-activated protein kinase 6	Mapk6	Rat	down	0.601958	_	_	_	_	_	0.548656	_	_	_	_
fucosidase, alpha-L- 2, plasma	Fuca2	Rat	down	0.597909	_	_	_	_	_	0.573428	_	_	_	_
RAB27B, member RAS oncogene family	Rab27b	Rat	down	0.593284	_	_	_	_	_	0.554909	_	_	_	_
transcription factor 21	Tcf21	Rat	down	0.592665	_	_	_	_	_	0.536664	_	_	_	_
fermitin family member 1	Fermt1	Rat	down	0.59206	_	_	_	_	_	0.622831	_	_	_	_
2 ' -5 ' -oligoadenylate synthetase 3	Oas3	Rat	down	0.589983	_	_	_	_	_	0.56474	_	_	_	_
vaccinia related kinase 2	Vrk2	Rat	down	0.587018	_	_	_	_	_	0.546269	_	_	_	_
chemokine (C-C motif) ligand 5	Ccl5	Rat	down	0.586614	_	_	_	_	_	0.533965	_	_	_	_
ring finger protein 43	Rnf43	Rat	down	0.582685	_	_	_	_	_	0.610163	_	_	_	_
retinoic acid induced 14	Rai14	Rat	down	0.582626	_	_	_	_	_	0.549439	_	_	_	_
CD96 molecule	Cd96	Rat	down	0.58257	_	_	_	_	_	0.458003	_	_	_	_
phosphoglycerate dehydrogenase	Phgdh	Rat	down	0.580032	_	_	_	_	_	0.6027	_	_	_	_
insulin-like growth factor binding protein 5	Igfbp5	Rat	down	0.57926	_	_	_	_	_	0.510134	_	_	_	_
nuclear receptor subfamily 1, group H, member 4	Nr1h4	Rat	down	0.57226	_	_	_	_	_	0.601368	_	_	_	_
acetoacetyl-CoA synthetase	Aacs	Rat	down	0.570444	_	_	_	_	_	0.57577	_	_	_	_
integrin, alpha 6	Itga6	Rat	down	0.570229	_	_	_	_	_	0.553164	_	_	_	_
RAB6B, member RAS oncogene family	Rab6b	Rat	down	0.570174	_	_	_	_	_	0.495075	_	_	_	_
serine threonine kinase 39	Stk39	Rat	down	0.569102	_	_	_	_	_	0.553041	_	_	_	_
coiled-coil domain containing 64	Ccdc64	Rat	down	0.565752	_	_	_	_	_	0.59848	_	_	_	_
actin, alpha 1, skeletal muscle	Acta1	Rat	down	0.565278	_	_	_	_	_	0.564674	_	_	_	_
transglutaminase 1 (protein-glutamine-gamma-glutamyltransferase)	Tgm1	Rat	down	0.550538	_	_	_	_	_	0.441717	_	_	_	_
toll-like receptor 4	Tlr4	Rat	down	0.549417	_	_	_	_	_	0.544216	_	_	_	_
lysyl oxidase-like 4	Loxl4	Rat	down	0.549257	_	_	_	_	_	0.394956	_	_	_	_
axin 2	Axin2	Rat	down	0.543315	_	_	_	_	_	0.631209	_	_	_	_
homer homolog 2 (Drosophila)	Homer2	Rat	down	0.539662	_	_	_	_	_	0.515437	_	_	_	_
small proline-rich protein 1A	Sprr1a	Rat	down	0.536292	_	_	_	_	_	0.493142	_	_	_	_
centromere protein A	Cenpa	Rat	down	0.536146	_	_	_	_	_	0.646202	_	_	_	_
proprotein convertase subtilisin/kexin type 9	Pcsk9	Rat	down	0.532907	_	_	_	_	_	0.567041	_	_	_	_
Cd276 molecule	Cd276	Rat	down	0.530297	_	_	_	_	_	0.47106	_	_	_	_
laminin, gamma 2	Lamc2	Rat	down	0.529702	_	_	_	_	_	0.483904	_	_	_	_
methylenetetrahydrofolate dehydrogenase (NADP+ dependent) 1-like	Mthfd1l	Rat	down	0.509262	_	_	_	_	_	0.489375	_	_	_	_
leucine rich repeat containing 2	Lrrc2	Rat	down	0.505379	_	_	_	_	_	0.472336	_	_	_	_
solute carrier family 6 (amino acid transporter), member 14	Slc6a14	Rat	down	0.498893	_	_	_	_	_	0.503235	_	_	_	_
GRAM domain containing 2	Gramd2	Rat	down	0.493221	_	_	_	_	_	0.515115	_	_	_	_
transforming growth factor, beta receptor 1	Tgfbr1	Rat	down	0.489869	_	_	_	_	_	0.63739	_	_	_	_
oxidized low density lipoprotein (lectin-like) receptor 1	Olr1	Rat	down	0.488857	_	_	_	_	_	0.473679	_	_	_	_
HRAS-like suppressor family, member 5	Hrasls5	Rat	down	0.480962	_	_	_	_	_	0.511513	_	_	_	_
ankyrin repeat domain 22	Ankrd22	Rat	down	0.479845	_	_	_	_	_	0.467632	_	_	_	_
stearoyl-CoA desaturase (delta-9-desaturase)	Scd	Rat	down	0.478633	_	_	_	_	_	0.476385	_	_	_	_
ArfGAP with SH3 domain, ankyrin repeat and PH domain 1	Asap1	Rat	down	0.477926	_	_	_	_	_	0.409703	_	_	_	_
serpin peptidase inhibitor, clade B (ovalbumin), member 5	Serpinb5	Rat	down	0.477751	_	_	_	_	_	0.443481	_	_	_	_
integrin, beta 6	Itgb6	Rat	down	0.457807	_	_	_	_	_	0.376535	_	_	_	_
interleukin 33	Il33	Rat	down	0.450288	_	_	_	_	_	0.302666	_	_	_	_
atonal homolog 1 (Drosophila)	Atoh1	Rat	down	0.436219	_	_	_	_	_	0.41387	_	_	_	_
solute carrier family 28 (sodium-coupled nucleoside transporter), member 2	Slc28a2	Rat	down	0.423349	_	_	_	_	_	0.453071	_	_	_	_
chemokine (C-C motif) ligand 20	Ccl20	Rat	down	0.417487	_	_	_	_	_	0.382165	_	_	_	_
matrix metallopeptidase 7	Mmp7	Rat	down	0.380667	_	_	_	_	_	0.310781	_	_	_	_
5-hydroxytryptamine (serotonin) receptor 4, G protein-coupled	Htr4	Rat	down	0.360711	_	_	_	_	_	0.38631	_	_	_	_
lysophosphatidic acid receptor 3	Lpar3	Rat	down	0.336172	_	_	_	_	_	0.312699	_	_	_	_
